# Supplementary material for: Identifying ceRNA Networks Associated With the Susceptibility and Persistence of Atrial Fibrillation Through Weighted Gene Co-Expression Network Analysis
Source: Front Genet. 2021 Jun 23;12:653474. doi: 10.3389/fgene.2021.653474 (PMC8261127; doi:10.3389/fgene.2021.653474)
Supplement: Supplementary file 2 [file Table_2.XLSX]

## Sheet: magenta
Triple network in magenta module
lncRNA	miRNA	mRNA
MIR1-1HG-AS1	hsa-miR-183-5p	GBP4
MIR1-1HG-AS1	hsa-miR-652-3p	GBP4
SNHG28	hsa-miR-27a-3p	FMO1
SNHG28	hsa-miR-27a-3p	WDR62
SNHG28	hsa-miR-27a-3p	OAS1
SNHG28	hsa-miR-129-2-3p	OAS1
SNHG28	hsa-miR-1343-3p	P2RX6
SNHG28	hsa-miR-27a-3p	HAS3
SNHG28	hsa-miR-129-2-3p	HAS3
SNHG28	hsa-miR-27a-3p	CDH23
SNHG28	hsa-miR-129-2-3p	P2RX3
SNHG28	hsa-miR-129-2-3p	ACCS
SNHG28	hsa-miR-1343-3p	PPM1H
SNHG28	hsa-miR-27a-3p	PPM1H
SNHG28	hsa-miR-129-2-3p	OAS3
SNHG28	hsa-miR-27a-3p	OAS3
SNHG28	hsa-miR-1343-3p	OAS3
SNHG28	hsa-miR-129-2-3p	OAS2
SNHG28	hsa-miR-27a-3p	OAS2
SNHG28	hsa-miR-129-2-3p	BTN3A3
SNHG28	hsa-miR-27a-3p	BTN3A3
SNHG28	hsa-miR-27a-3p	CDH6
SNHG28	hsa-miR-27a-3p	APOBEC2
SNHG28	hsa-miR-129-2-3p	SSUH2
SNHG28	hsa-miR-1343-3p	SSUH2
SNHG28	hsa-miR-27a-3p	ATP1B2
SNHG28	hsa-miR-129-2-3p	BST2
SNHG28	hsa-miR-1343-3p	BST2
SNHG28	hsa-miR-1343-3p	PNPLA7
SNHG28	hsa-miR-129-2-3p	IDO1
SNHG28	hsa-miR-27a-3p	IDO1
SNHG28	hsa-miR-129-2-3p	TRIM22
SNHG28	hsa-miR-27a-3p	TRIM22
SNHG28	hsa-miR-27a-3p	XAF1
SNHG28	hsa-miR-129-2-3p	XAF1
SNHG28	hsa-miR-27a-3p	CMPK2
SNHG28	hsa-miR-129-2-3p	CMPK2
SNHG28	hsa-miR-27a-3p	SPX
SNHG28	hsa-miR-1343-3p	OASL
SNHG28	hsa-miR-129-2-3p	OASL
SNHG28	hsa-miR-129-2-3p	CCDC146
SNHG28	hsa-miR-129-2-3p	RTP4
SNHG28	hsa-miR-129-2-3p	IFI44L
SNHG28	hsa-miR-27a-3p	IFI44L
SNHG28	hsa-miR-129-2-3p	STAMBPL1
SNHG28	hsa-miR-27a-3p	STAMBPL1
SNHG28	hsa-miR-27a-3p	MNS1
SNHG28	hsa-miR-129-2-3p	MNS1
SNHG28	hsa-miR-129-2-3p	HERC6
SNHG28	hsa-miR-27a-3p	HERC6
SNHG28	hsa-miR-129-2-3p	TAPBPL
SNHG28	hsa-miR-27a-3p	TAPBPL
SNHG28	hsa-miR-27a-3p	CYP11A1
SNHG28	hsa-miR-27a-3p	NLRC5
SNHG28	hsa-miR-129-2-3p	NLRC5
SNHG28	hsa-miR-1343-3p	RGS5
SNHG28	hsa-miR-129-2-3p	RGS5
SNHG28	hsa-miR-129-2-3p	STAC
SNHG28	hsa-miR-1343-3p	STAC
SNHG28	hsa-miR-129-2-3p	CLEC4F
SNHG28	hsa-miR-27a-3p	MX1
SNHG28	hsa-miR-129-2-3p	MX1
SNHG28	hsa-miR-1343-3p	MX1
SNHG28	hsa-miR-27a-3p	PAFAH2
SNHG28	hsa-miR-129-2-3p	EXTL1
SNHG28	hsa-miR-27a-3p	PKD1L1
SNHG28	hsa-miR-129-2-3p	SLC45A3
SNHG28	hsa-miR-1343-3p	ACE
SNHG28	hsa-miR-27a-3p	B3GALT2
SNHG28	hsa-miR-129-2-3p	B3GALT2
SNHG28	hsa-miR-129-2-3p	GBP4
SNHG28	hsa-miR-129-2-3p	ACP6
SNHG28	hsa-miR-27a-3p	ACP6
SNHG28	hsa-miR-27a-3p	EGFLAM
SNHG28	hsa-miR-27a-3p	SLC16A9
SNHG28	hsa-miR-129-2-3p	SLC16A9
SNHG28	hsa-miR-1343-3p	SLC16A9
SNHG28	hsa-miR-1343-3p	SALL2
SNHG28	hsa-miR-129-2-3p	PRRT2
SNHG28	hsa-miR-27a-3p	PRRT2
SNHG28	hsa-miR-1343-3p	RAB26
SNHG28	hsa-miR-27a-3p	ENTPD3
SNHG28	hsa-miR-129-2-3p	ENTPD3
SNHG28	hsa-miR-129-2-3p	BATF2
SNHG28	hsa-miR-1343-3p	BATF2
SNHG28	hsa-miR-1343-3p	MUC3A
SNHG28	hsa-miR-27a-3p	MUC3A
SNHG28	hsa-miR-129-2-3p	FAXDC2
SNHG28	hsa-miR-27a-3p	GPR27
SNHG28	hsa-miR-27a-3p	SAMD9L
SNHG28	hsa-miR-129-2-3p	SAMD9L
SNHG28	hsa-miR-27a-3p	DAND5
SNHG28	hsa-miR-129-2-3p	RTL3
SNHG28	hsa-miR-27a-3p	WSCD1
SNHG28	hsa-miR-129-2-3p	DDX60L
SNHG28	hsa-miR-1343-3p	DDX60L
SNHG28	hsa-miR-27a-3p	OPCML
SNHG28	hsa-miR-129-2-3p	OPCML
SNHG28	hsa-miR-129-2-3p	FAM217B
SNHG28	hsa-miR-27a-3p	FAM217B
SNHG28	hsa-miR-129-2-3p	CYS1
SNHG28	hsa-miR-27a-3p	TNFRSF25
SNHG28	hsa-miR-129-2-3p	TNFRSF25
HCP5	hsa-miR-671-5p	ANOS1
HCP5	hsa-miR-744-5p	ANOS1
HCP5	hsa-miR-20a-3p	LAMA4
HCP5	hsa-miR-93-3p	LAMA4
HCP5	hsa-miR-125a-3p	LAMA4
HCP5	hsa-miR-671-5p	CCDC146
HCP5	hsa-miR-101-3p	CCDC146
HCP5	hsa-miR-93-3p	STAMBPL1
HCP5	hsa-miR-101-3p	STAMBPL1
HCP5	hsa-miR-21-3p	STAMBPL1
HCP5	hsa-miR-205-5p	ACP6
HCP5	hsa-miR-21-3p	ACP6
HCP5	hsa-miR-145-5p	ACP6
HCP5	hsa-miR-140-5p	SALL2
HCP5	hsa-miR-21-3p	SALL2
HCP5	hsa-miR-378g	HSD11B2
HCP5	hsa-miR-769-3p	HSD11B2
HCP5	hsa-miR-92a-3p	SAMD9L
HCP5	hsa-miR-32-5p	SAMD9L
HCP5	hsa-miR-101-3p	SAMD9L
HCP5	hsa-miR-92b-3p	SAMD9L
HCP5	hsa-miR-21-3p	SAMD9L
HCP5	hsa-miR-205-5p	IFIT1
HCP5	hsa-miR-33b-5p	IFIT1
HCP5	hsa-miR-145-5p	IFIT1
HCP5	hsa-miR-671-5p	IFIT1
HCP5	hsa-miR-21-3p	IFIT1
HCP5	hsa-miR-1254	IFIT1
HCG27	hsa-miR-27a-3p	FMO1
HCG27	hsa-miR-195-5p	ANOS1
HCG27	hsa-miR-195-5p	TMEM159
HCG27	hsa-miR-27a-3p	TMEM159
HCG27	hsa-miR-27a-3p	WDR62
HCG27	hsa-miR-195-5p	WDR62
HCG27	hsa-miR-27a-3p	HAS3
HCG27	hsa-miR-941	HAS3
HCG27	hsa-miR-195-5p	EYA1
HCG27	hsa-miR-27a-3p	EYA1
HCG27	hsa-miR-27a-3p	CDH23
HCG27	hsa-miR-27a-3p	RERGL
HCG27	hsa-miR-27a-3p	CDH6
HCG27	hsa-miR-195-5p	CDH6
HCG27	hsa-miR-195-5p	PTCH2
HCG27	hsa-miR-27a-3p	APOBEC2
HCG27	hsa-miR-27a-3p	ATP1B2
HCG27	hsa-miR-941	RGN
HCG27	hsa-miR-27a-3p	IDO1
HCG27	hsa-miR-941	TRIM22
HCG27	hsa-miR-27a-3p	TRIM22
HCG27	hsa-miR-27a-3p	CMPK2
HCG27	hsa-miR-941	CMPK2
HCG27	hsa-miR-27a-3p	SPX
HCG27	hsa-miR-941	CCDC146
HCG27	hsa-miR-27a-3p	TAPBPL
HCG27	hsa-miR-195-5p	SESN3
HCG27	hsa-miR-27a-3p	SESN3
HCG27	hsa-miR-941	SESN3
HCG27	hsa-miR-195-5p	PPP1R1C
HCG27	hsa-miR-941	ACSS1
HCG27	hsa-miR-27a-3p	PAFAH2
HCG27	hsa-miR-195-5p	PAFAH2
HCG27	hsa-miR-27a-3p	PKD1L1
HCG27	hsa-miR-195-5p	B3GALT2
HCG27	hsa-miR-27a-3p	B3GALT2
HCG27	hsa-miR-27a-3p	ACP6
HCG27	hsa-miR-27a-3p	EGFLAM
HCG27	hsa-miR-27a-3p	ENTPD3
HCG27	hsa-miR-27a-3p	MUC3A
HCG27	hsa-miR-27a-3p	GPR27
HCG27	hsa-miR-195-5p	KLHL38
HCG27	hsa-miR-195-5p	SCN4B
HCG27	hsa-miR-27a-3p	DAND5
HCG27	hsa-miR-941	DAND5
HCG27	hsa-miR-27a-3p	WSCD1
HCG27	hsa-miR-27a-3p	OPCML
HCG27	hsa-miR-195-5p	CYP4F12
HCG27	hsa-miR-27a-3p	TLR5
HCG27	hsa-miR-195-5p	FAM217B
HCG27	hsa-miR-27a-3p	FAM217B
HCG27	hsa-miR-27a-3p	COL11A2
CCDC18-AS1	hsa-miR-27a-3p	FMO1
CCDC18-AS1	hsa-miR-27a-3p	OAS1
CCDC18-AS1	hsa-miR-9-5p	OAS1
CCDC18-AS1	hsa-miR-124-3p	OAS1
CCDC18-AS1	hsa-miR-27a-3p	GATA3
CCDC18-AS1	hsa-miR-27b-3p	GATA3
CCDC18-AS1	hsa-miR-124-3p	GATA3
CCDC18-AS1	hsa-miR-27a-3p	PPM1H
CCDC18-AS1	hsa-miR-27b-3p	PPM1H
CCDC18-AS1	hsa-miR-27a-3p	BTN3A3
CCDC18-AS1	hsa-miR-125a-5p	BTN3A3
CCDC18-AS1	hsa-miR-125b-5p	BTN3A3
CCDC18-AS1	hsa-miR-124-3p	GBP1
CCDC18-AS1	hsa-miR-27a-3p	GBP1
CCDC18-AS1	hsa-miR-9-5p	PTCH2
CCDC18-AS1	hsa-miR-125b-5p	PTCH2
CCDC18-AS1	hsa-miR-125a-5p	PTCH2
CCDC18-AS1	hsa-miR-124-3p	IFIT3
CCDC18-AS1	hsa-miR-9-5p	IFIT3
CCDC18-AS1	hsa-miR-27b-3p	IFIT3
CCDC18-AS1	hsa-miR-124-3p	IFIT2
CCDC18-AS1	hsa-miR-9-5p	IFIT2
CCDC18-AS1	hsa-miR-27b-3p	IFIT2
CCDC18-AS1	hsa-miR-27a-3p	APOBEC2
CCDC18-AS1	hsa-miR-124-3p	XAF1
CCDC18-AS1	hsa-miR-27a-3p	XAF1
CCDC18-AS1	hsa-miR-124-3p	CMPK2
CCDC18-AS1	hsa-miR-27a-3p	CMPK2
CCDC18-AS1	hsa-miR-27b-3p	SPX
CCDC18-AS1	hsa-miR-27a-3p	SPX
CCDC18-AS1	hsa-miR-27b-3p	OASL
CCDC18-AS1	hsa-miR-9-5p	OASL
CCDC18-AS1	hsa-miR-124-3p	OASL
CCDC18-AS1	hsa-miR-27a-3p	AGAP2
CCDC18-AS1	hsa-miR-27b-3p	AGAP2
CCDC18-AS1	hsa-miR-9-5p	STAMBPL1
CCDC18-AS1	hsa-miR-27b-3p	STAMBPL1
CCDC18-AS1	hsa-miR-27a-3p	STAMBPL1
CCDC18-AS1	hsa-miR-27a-3p	MNS1
CCDC18-AS1	hsa-miR-124-3p	MNS1
CCDC18-AS1	hsa-miR-27a-3p	CYP11A1
CCDC18-AS1	hsa-miR-124-3p	RGS5
CCDC18-AS1	hsa-miR-369-3p	RGS5
CCDC18-AS1	hsa-miR-9-5p	RGS5
CCDC18-AS1	hsa-miR-27a-3p	PLEKHA6
CCDC18-AS1	hsa-miR-125b-5p	PLEKHA6
CCDC18-AS1	hsa-miR-27b-3p	PLEKHA6
CCDC18-AS1	hsa-miR-124-3p	PLEKHA6
CCDC18-AS1	hsa-miR-369-3p	FAM13C
CCDC18-AS1	hsa-miR-124-3p	FAM13C
CCDC18-AS1	hsa-miR-9-5p	SESN3
CCDC18-AS1	hsa-miR-27b-3p	SESN3
CCDC18-AS1	hsa-miR-27a-3p	SESN3
CCDC18-AS1	hsa-miR-369-3p	SESN3
CCDC18-AS1	hsa-miR-4326	SESN3
CCDC18-AS1	hsa-miR-940	SESN3
CCDC18-AS1	hsa-miR-124-3p	SESN3
CCDC18-AS1	hsa-miR-125b-5p	ACSS1
CCDC18-AS1	hsa-miR-125a-5p	ACSS1
CCDC18-AS1	hsa-miR-27a-3p	PKD1L1
CCDC18-AS1	hsa-miR-27a-3p	ACP6
CCDC18-AS1	hsa-miR-338-3p	ACP6
CCDC18-AS1	hsa-miR-124-3p	ACP6
CCDC18-AS1	hsa-miR-27a-3p	EGFLAM
CCDC18-AS1	hsa-miR-9-5p	PRRT2
CCDC18-AS1	hsa-miR-27a-3p	PRRT2
CCDC18-AS1	hsa-miR-9-5p	CSRNP3
CCDC18-AS1	hsa-miR-338-3p	CSRNP3
CCDC18-AS1	hsa-miR-369-3p	CSRNP3
CCDC18-AS1	hsa-miR-27a-3p	OPCML
CCDC18-AS1	hsa-miR-382-5p	OPCML
CCDC18-AS1	hsa-miR-9-5p	IFIT1
CCDC18-AS1	hsa-miR-124-3p	IFIT1
CCDC18-AS1	hsa-miR-27b-3p	IFIT1
CCDC18-AS1	hsa-miR-124-3p	ISG15
CCDC18-AS1	hsa-miR-27b-3p	ISG15
CCDC18-AS1	hsa-miR-27a-3p	ISG15
CCDC18-AS1	hsa-miR-9-5p	ISG15
CCDC18-AS1	hsa-miR-124-3p	FAM217B
CCDC18-AS1	hsa-miR-27a-3p	FAM217B
CCDC18-AS1	hsa-miR-369-3p	FAM217B
CCDC18-AS1	hsa-miR-27b-3p	FAM217B
CCDC18-AS1	hsa-miR-27a-3p	TNFRSF25
CCDC18-AS1	hsa-miR-27b-3p	TNFRSF25
CCDC18-AS1	hsa-miR-124-3p	TNFRSF25
AC018647.1	hsa-miR-27a-3p	FMO1
AC018647.1	hsa-miR-16-5p	ANOS1
AC018647.1	hsa-miR-195-5p	ANOS1
AC018647.1	hsa-miR-27a-3p	WDR62
AC018647.1	hsa-miR-195-5p	WDR62
AC018647.1	hsa-miR-16-5p	WDR62
AC018647.1	hsa-miR-27a-3p	OAS1
AC018647.1	hsa-miR-16-5p	OAS1
AC018647.1	hsa-miR-124-3p	OAS1
AC018647.1	hsa-miR-27a-3p	EYA1
AC018647.1	hsa-miR-27b-3p	EYA1
AC018647.1	hsa-miR-16-5p	EYA1
AC018647.1	hsa-miR-195-5p	EYA1
AC018647.1	hsa-miR-27a-3p	PPM1H
AC018647.1	hsa-miR-27b-3p	PPM1H
AC018647.1	hsa-miR-124-3p	OAS3
AC018647.1	hsa-miR-16-5p	OAS3
AC018647.1	hsa-miR-27a-3p	OAS3
AC018647.1	hsa-miR-16-5p	LAMA4
AC018647.1	hsa-miR-195-5p	LAMA4
AC018647.1	hsa-miR-124-3p	LAMA4
AC018647.1	hsa-miR-195-5p	CDH6
AC018647.1	hsa-miR-27a-3p	CDH6
AC018647.1	hsa-miR-16-5p	GBP1
AC018647.1	hsa-miR-124-3p	GBP1
AC018647.1	hsa-miR-27a-3p	GBP1
AC018647.1	hsa-miR-124-3p	IFIT2
AC018647.1	hsa-miR-27b-3p	IFIT2
AC018647.1	hsa-miR-16-5p	IFIT2
AC018647.1	hsa-miR-27a-3p	APOBEC2
AC018647.1	hsa-miR-485-3p	BST2
AC018647.1	hsa-miR-124-3p	BST2
AC018647.1	hsa-miR-16-5p	BST2
AC018647.1	hsa-miR-27a-3p	XAF1
AC018647.1	hsa-miR-124-3p	XAF1
AC018647.1	hsa-miR-195-5p	PATJ
AC018647.1	hsa-miR-485-3p	PATJ
AC018647.1	hsa-miR-124-3p	CMPK2
AC018647.1	hsa-miR-27a-3p	CMPK2
AC018647.1	hsa-miR-27a-3p	SPX
AC018647.1	hsa-miR-27b-3p	SPX
AC018647.1	hsa-miR-16-5p	NREP
AC018647.1	hsa-miR-124-3p	NREP
AC018647.1	hsa-miR-27b-3p	NREP
AC018647.1	hsa-miR-124-3p	OASL
AC018647.1	hsa-miR-27b-3p	OASL
AC018647.1	hsa-miR-16-5p	OASL
AC018647.1	hsa-miR-27a-3p	AGAP2
AC018647.1	hsa-miR-27b-3p	AGAP2
AC018647.1	hsa-miR-124-3p	IFI44L
AC018647.1	hsa-miR-27a-3p	IFI44L
AC018647.1	hsa-miR-27b-3p	IFI44L
AC018647.1	hsa-miR-16-5p	IFI44L
AC018647.1	hsa-miR-27a-3p	STAMBPL1
AC018647.1	hsa-miR-27b-3p	STAMBPL1
AC018647.1	hsa-miR-16-5p	STAMBPL1
AC018647.1	hsa-miR-124-3p	MNS1
AC018647.1	hsa-miR-27a-3p	MNS1
AC018647.1	hsa-miR-27a-3p	CYP11A1
AC018647.1	hsa-miR-27a-3p	NLRC5
AC018647.1	hsa-miR-16-5p	NLRC5
AC018647.1	hsa-miR-218-5p	NLRC5
AC018647.1	hsa-miR-15b-5p	RGS5
AC018647.1	hsa-miR-16-5p	RGS5
AC018647.1	hsa-miR-124-3p	RGS5
AC018647.1	hsa-miR-15a-5p	RGS5
AC018647.1	hsa-miR-195-5p	RGS5
AC018647.1	hsa-miR-124-3p	MX1
AC018647.1	hsa-miR-27a-3p	MX1
AC018647.1	hsa-miR-16-5p	MX1
AC018647.1	hsa-miR-27a-3p	PKD1L1
AC018647.1	hsa-miR-218-5p	B3GALT2
AC018647.1	hsa-miR-195-5p	B3GALT2
AC018647.1	hsa-miR-27a-3p	B3GALT2
AC018647.1	hsa-miR-27a-3p	ACP6
AC018647.1	hsa-miR-124-3p	ACP6
AC018647.1	hsa-miR-338-3p	ACP6
AC018647.1	hsa-miR-124-3p	SERPINI1
AC018647.1	hsa-miR-16-5p	SERPINI1
AC018647.1	hsa-miR-27a-3p	EGFLAM
AC018647.1	hsa-miR-16-5p	RAB26
AC018647.1	hsa-miR-124-3p	RAB26
AC018647.1	hsa-miR-16-5p	GPR27
AC018647.1	hsa-miR-27a-3p	GPR27
AC018647.1	hsa-miR-16-5p	KLHL38
AC018647.1	hsa-miR-195-5p	KLHL38
AC018647.1	hsa-miR-195-5p	SCN4B
AC018647.1	hsa-miR-124-3p	SCN4B
AC018647.1	hsa-miR-16-5p	MX2
AC018647.1	hsa-miR-195-5p	MX2
AC018647.1	hsa-miR-27a-3p	OPCML
AC018647.1	hsa-miR-432-5p	OPCML
AC018647.1	hsa-miR-27b-3p	IFIT1
AC018647.1	hsa-miR-16-5p	IFIT1
AC018647.1	hsa-miR-218-5p	IFIT1
AC018647.1	hsa-miR-485-3p	IFIT1
AC018647.1	hsa-miR-124-3p	IFIT1
AC018647.1	hsa-miR-195-5p	CYP4F12
AC018647.1	hsa-miR-16-5p	CYP4F12
AC018647.1	hsa-miR-27a-3p	ISG15
AC018647.1	hsa-miR-27b-3p	ISG15
AC018647.1	hsa-miR-124-3p	ISG15
AC018647.1	hsa-miR-16-5p	ISG15
AC018647.1	hsa-miR-27a-3p	TNFRSF25
AC018647.1	hsa-miR-124-3p	TNFRSF25
AC018647.1	hsa-miR-27b-3p	TNFRSF25
LINC01341	hsa-miR-218-5p	GATA3
LINC01341	hsa-miR-218-5p	NLRC5
LINC01341	hsa-miR-218-5p	SLC45A3
LINC01341	hsa-miR-218-5p	B3GALT2
A2M-AS1	hsa-miR-1-3p	ANOS1
A2M-AS1	hsa-miR-1-3p	WDR62
A2M-AS1	hsa-miR-1-3p	SEMA5B
A2M-AS1	hsa-miR-1-3p	RGN
A2M-AS1	hsa-miR-425-5p	NREP
A2M-AS1	hsa-miR-1-3p	NREP
A2M-AS1	hsa-miR-1-3p	STAC
A2M-AS1	hsa-miR-1-3p	PAFAH2
A2M-AS1	hsa-miR-1-3p	PKD1L1
A2M-AS1	hsa-miR-1-3p	SALL2
A2M-AS1	hsa-miR-1-3p	MUC3A
ZNF436-AS1	hsa-miR-16-5p	ANOS1
ZNF436-AS1	hsa-miR-195-5p	ANOS1
ZNF436-AS1	hsa-miR-34a-5p	TSPAN32
ZNF436-AS1	hsa-miR-16-5p	OAS1
ZNF436-AS1	hsa-miR-27a-3p	OAS1
ZNF436-AS1	hsa-miR-449a	OAS1
ZNF436-AS1	hsa-miR-34a-5p	SNPH
ZNF436-AS1	hsa-miR-27a-3p	SNPH
ZNF436-AS1	hsa-miR-27a-3p	HAS3
ZNF436-AS1	hsa-miR-181a-2-3p	HAS3
ZNF436-AS1	hsa-miR-7-5p	EYA1
ZNF436-AS1	hsa-miR-16-5p	EYA1
ZNF436-AS1	hsa-miR-195-5p	EYA1
ZNF436-AS1	hsa-miR-27a-3p	EYA1
ZNF436-AS1	hsa-miR-181a-2-3p	OAS3
ZNF436-AS1	hsa-miR-27a-3p	OAS3
ZNF436-AS1	hsa-miR-16-5p	OAS3
ZNF436-AS1	hsa-miR-449a	OAS3
ZNF436-AS1	hsa-miR-34a-5p	OAS3
ZNF436-AS1	hsa-miR-34a-5p	OAS2
ZNF436-AS1	hsa-miR-27a-3p	OAS2
ZNF436-AS1	hsa-miR-148a-5p	OAS2
ZNF436-AS1	hsa-miR-7-5p	OAS2
ZNF436-AS1	hsa-miR-449a	OAS2
ZNF436-AS1	hsa-miR-449a	BTN3A3
ZNF436-AS1	hsa-miR-16-5p	BTN3A3
ZNF436-AS1	hsa-miR-10b-5p	BTN3A3
ZNF436-AS1	hsa-miR-7-5p	BTN3A3
ZNF436-AS1	hsa-miR-27a-3p	BTN3A3
ZNF436-AS1	hsa-miR-195-5p	CDH6
ZNF436-AS1	hsa-miR-449a	CDH6
ZNF436-AS1	hsa-miR-27a-3p	CDH6
ZNF436-AS1	hsa-miR-7-5p	IFIH1
ZNF436-AS1	hsa-miR-449a	IFIH1
ZNF436-AS1	hsa-miR-16-5p	IFIH1
ZNF436-AS1	hsa-miR-16-5p	GBP1
ZNF436-AS1	hsa-miR-7-5p	GBP1
ZNF436-AS1	hsa-miR-10b-5p	GBP1
ZNF436-AS1	hsa-miR-27a-3p	GBP1
ZNF436-AS1	hsa-miR-449a	IFIT2
ZNF436-AS1	hsa-miR-34a-5p	IFIT2
ZNF436-AS1	hsa-miR-16-5p	IFIT2
ZNF436-AS1	hsa-miR-7-5p	IFIT2
ZNF436-AS1	hsa-miR-10b-5p	BST2
ZNF436-AS1	hsa-miR-34a-5p	BST2
ZNF436-AS1	hsa-miR-449a	BST2
ZNF436-AS1	hsa-miR-16-5p	BST2
ZNF436-AS1	hsa-miR-34a-5p	IDO1
ZNF436-AS1	hsa-miR-27a-3p	IDO1
ZNF436-AS1	hsa-miR-449a	IDO1
ZNF436-AS1	hsa-miR-10b-5p	TRIM22
ZNF436-AS1	hsa-miR-27a-3p	TRIM22
ZNF436-AS1	hsa-miR-449a	TRIM22
ZNF436-AS1	hsa-miR-34a-5p	XAF1
ZNF436-AS1	hsa-miR-27a-3p	XAF1
ZNF436-AS1	hsa-miR-449a	XAF1
ZNF436-AS1	hsa-miR-27a-3p	CMPK2
ZNF436-AS1	hsa-miR-449a	CMPK2
ZNF436-AS1	hsa-miR-34a-5p	CMPK2
ZNF436-AS1	hsa-miR-7-5p	SPX
ZNF436-AS1	hsa-miR-27a-3p	SPX
ZNF436-AS1	hsa-miR-34a-5p	NREP
ZNF436-AS1	hsa-miR-7-5p	NREP
ZNF436-AS1	hsa-miR-10b-5p	NREP
ZNF436-AS1	hsa-miR-16-5p	NREP
ZNF436-AS1	hsa-miR-449a	IFI44L
ZNF436-AS1	hsa-miR-16-5p	IFI44L
ZNF436-AS1	hsa-miR-34a-5p	IFI44L
ZNF436-AS1	hsa-miR-27a-3p	IFI44L
ZNF436-AS1	hsa-miR-7-5p	IFI44
ZNF436-AS1	hsa-miR-16-5p	IFI44
ZNF436-AS1	hsa-miR-449a	IFI44
ZNF436-AS1	hsa-miR-34a-5p	IFI44
ZNF436-AS1	hsa-miR-34a-5p	MNS1
ZNF436-AS1	hsa-miR-10b-5p	MNS1
ZNF436-AS1	hsa-miR-27a-3p	MNS1
ZNF436-AS1	hsa-miR-34a-5p	HERC6
ZNF436-AS1	hsa-miR-27a-3p	HERC6
ZNF436-AS1	hsa-miR-449a	HERC6
ZNF436-AS1	hsa-miR-16-5p	HERC5
ZNF436-AS1	hsa-miR-10b-5p	HERC5
ZNF436-AS1	hsa-miR-449a	HERC5
ZNF436-AS1	hsa-miR-449a	TAPBPL
ZNF436-AS1	hsa-miR-27a-3p	TAPBPL
ZNF436-AS1	hsa-miR-10b-5p	TAPBPL
ZNF436-AS1	hsa-miR-16-5p	LRIG3
ZNF436-AS1	hsa-miR-10b-5p	LRIG3
ZNF436-AS1	hsa-miR-148a-5p	LRIG3
ZNF436-AS1	hsa-miR-7-5p	LRIG3
ZNF436-AS1	hsa-miR-218-5p	NLRC5
ZNF436-AS1	hsa-miR-16-5p	NLRC5
ZNF436-AS1	hsa-miR-27a-3p	NLRC5
ZNF436-AS1	hsa-miR-34a-5p	NLRC5
ZNF436-AS1	hsa-miR-15b-5p	RGS5
ZNF436-AS1	hsa-miR-15a-5p	RGS5
ZNF436-AS1	hsa-miR-7-5p	RGS5
ZNF436-AS1	hsa-miR-16-5p	RGS5
ZNF436-AS1	hsa-miR-34a-5p	RGS5
ZNF436-AS1	hsa-miR-195-5p	RGS5
ZNF436-AS1	hsa-miR-27a-3p	PLEKHA6
ZNF436-AS1	hsa-miR-10b-5p	PLEKHA6
ZNF436-AS1	hsa-miR-195-5p	PLEKHA6
ZNF436-AS1	hsa-miR-15a-5p	SESN3
ZNF436-AS1	hsa-miR-27a-3p	SESN3
ZNF436-AS1	hsa-miR-195-5p	SESN3
ZNF436-AS1	hsa-miR-7-5p	SESN3
ZNF436-AS1	hsa-miR-16-5p	SESN3
ZNF436-AS1	hsa-miR-15b-5p	SESN3
ZNF436-AS1	hsa-miR-218-5p	SESN3
ZNF436-AS1	hsa-miR-34a-5p	PPP1R1C
ZNF436-AS1	hsa-miR-16-5p	PPP1R1C
ZNF436-AS1	hsa-miR-195-5p	PPP1R1C
ZNF436-AS1	hsa-miR-16-5p	MX1
ZNF436-AS1	hsa-miR-449a	MX1
ZNF436-AS1	hsa-miR-27a-3p	MX1
ZNF436-AS1	hsa-miR-34a-5p	MX1
ZNF436-AS1	hsa-miR-34a-5p	SLC45A3
ZNF436-AS1	hsa-miR-218-5p	SLC45A3
ZNF436-AS1	hsa-miR-27a-3p	B3GALT2
ZNF436-AS1	hsa-miR-218-5p	B3GALT2
ZNF436-AS1	hsa-miR-195-5p	B3GALT2
ZNF436-AS1	hsa-miR-27a-3p	ACP6
ZNF436-AS1	hsa-miR-34a-5p	ACP6
ZNF436-AS1	hsa-miR-27a-3p	EGFLAM
ZNF436-AS1	hsa-miR-10b-5p	SLC16A9
ZNF436-AS1	hsa-miR-15b-5p	SLC16A9
ZNF436-AS1	hsa-miR-16-5p	SLC16A9
ZNF436-AS1	hsa-miR-15a-5p	SLC16A9
ZNF436-AS1	hsa-miR-27a-3p	SLC16A9
ZNF436-AS1	hsa-miR-10b-5p	RAB26
ZNF436-AS1	hsa-miR-16-5p	RAB26
ZNF436-AS1	hsa-miR-10b-5p	BATF2
ZNF436-AS1	hsa-miR-449a	BATF2
ZNF436-AS1	hsa-miR-7-5p	GPR27
ZNF436-AS1	hsa-miR-27a-3p	GPR27
ZNF436-AS1	hsa-miR-16-5p	GPR27
ZNF436-AS1	hsa-miR-195-5p	KLHL38
ZNF436-AS1	hsa-miR-16-5p	KLHL38
ZNF436-AS1	hsa-miR-16-5p	DDX60L
ZNF436-AS1	hsa-miR-7-5p	DDX60L
ZNF436-AS1	hsa-miR-449a	DDX60L
ZNF436-AS1	hsa-miR-148a-5p	DDX60L
ZNF436-AS1	hsa-miR-195-5p	MX2
ZNF436-AS1	hsa-miR-449a	MX2
ZNF436-AS1	hsa-miR-34a-5p	MX2
ZNF436-AS1	hsa-miR-16-5p	MX2
ZNF436-AS1	hsa-miR-218-5p	IFIT1
ZNF436-AS1	hsa-miR-449a	IFIT1
ZNF436-AS1	hsa-miR-34a-5p	IFIT1
ZNF436-AS1	hsa-miR-16-5p	IFIT1
ZNF436-AS1	hsa-miR-195-5p	CYP4F12
ZNF436-AS1	hsa-miR-16-5p	CYP4F12
ZNF436-AS1	hsa-miR-16-5p	ISG15
ZNF436-AS1	hsa-miR-27a-3p	ISG15
ZNF436-AS1	hsa-miR-449a	ISG15
ZNF436-AS1	hsa-miR-140-5p	SLC6A9
ZNF436-AS1	hsa-miR-16-5p	SLC6A9
ZNF436-AS1	hsa-miR-27a-3p	SLC6A9
ZNF436-AS1	hsa-miR-4726-3p	SLC6A9
ZNF436-AS1	hsa-miR-296-3p	SLC6A9
ZNF436-AS1	hsa-miR-34a-5p	SLC6A9
ZNF436-AS1	hsa-miR-34a-5p	TNFRSF25
ZNF436-AS1	hsa-miR-27a-3p	TNFRSF25
ZNF436-AS1	hsa-miR-15a-5p	NBPF1
ZNF436-AS1	hsa-miR-15b-5p	NBPF1
ZNF436-AS1	hsa-miR-195-5p	NBPF1
ZNF436-AS1	hsa-miR-16-5p	NBPF1
ZNF436-AS1	hsa-miR-449a	APOBEC3G
ZNF436-AS1	hsa-miR-148a-5p	APOBEC3G
AC104083.1	hsa-miR-16-5p	ANOS1
AC104083.1	hsa-let-7b-5p	ANOS1
AC104083.1	hsa-miR-195-5p	ANOS1
AC104083.1	hsa-miR-107	BTN3A1
AC104083.1	hsa-miR-302c-3p	BTN3A1
AC104083.1	hsa-miR-16-5p	BTN3A1
AC104083.1	hsa-miR-103a-3p	BTN3A1
AC104083.1	hsa-miR-34a-5p	TSPAN32
AC104083.1	hsa-miR-107	WDR62
AC104083.1	hsa-miR-16-5p	WDR62
AC104083.1	hsa-miR-195-5p	WDR62
AC104083.1	hsa-miR-103a-3p	WDR62
AC104083.1	hsa-miR-34a-5p	WDR62
AC104083.1	hsa-miR-19a-3p	SNPH
AC104083.1	hsa-miR-1271-5p	SNPH
AC104083.1	hsa-miR-19b-3p	SNPH
AC104083.1	hsa-miR-34a-5p	SNPH
AC104083.1	hsa-miR-103a-3p	EYA1
AC104083.1	hsa-let-7b-5p	EYA1
AC104083.1	hsa-miR-195-5p	EYA1
AC104083.1	hsa-miR-16-5p	EYA1
AC104083.1	hsa-miR-107	EYA1
AC104083.1	hsa-miR-16-5p	GATA3
AC104083.1	hsa-miR-15a-5p	GATA3
AC104083.1	hsa-miR-34a-5p	GATA3
AC104083.1	hsa-miR-320a	GATA3
AC104083.1	hsa-miR-15b-5p	GATA3
AC104083.1	hsa-miR-195-5p	GATA3
AC104083.1	hsa-miR-21-5p	GATA3
AC104083.1	hsa-miR-107	OAS3
AC104083.1	hsa-miR-130b-3p	OAS3
AC104083.1	hsa-miR-34a-5p	OAS3
AC104083.1	hsa-miR-16-5p	OAS3
AC104083.1	hsa-miR-449a	OAS3
AC104083.1	hsa-miR-301a-3p	OAS3
AC104083.1	hsa-miR-454-3p	OAS3
AC104083.1	hsa-miR-301b-3p	OAS3
AC104083.1	hsa-miR-103a-3p	OAS3
AC104083.1	hsa-miR-449a	BTN3A3
AC104083.1	hsa-miR-107	BTN3A3
AC104083.1	hsa-let-7b-5p	BTN3A3
AC104083.1	hsa-miR-103a-3p	BTN3A3
AC104083.1	hsa-miR-16-5p	BTN3A3
AC104083.1	hsa-miR-182-5p	BTN3A3
AC104083.1	hsa-miR-30e-3p	LAMA4
AC104083.1	hsa-miR-30d-3p	LAMA4
AC104083.1	hsa-miR-195-5p	LAMA4
AC104083.1	hsa-miR-30a-3p	LAMA4
AC104083.1	hsa-miR-16-5p	LAMA4
AC104083.1	hsa-miR-449a	CDH6
AC104083.1	hsa-miR-195-5p	CDH6
AC104083.1	hsa-miR-107	CDH6
AC104083.1	hsa-miR-103a-3p	CDH6
AC104083.1	hsa-let-7b-5p	CDH6
AC104083.1	hsa-miR-9-5p	PTCH2
AC104083.1	hsa-miR-195-5p	PTCH2
AC104083.1	hsa-miR-497-5p	PTCH2
AC104083.1	hsa-miR-125b-2-3p	NREP
AC104083.1	hsa-miR-34a-5p	NREP
AC104083.1	hsa-miR-130b-3p	NREP
AC104083.1	hsa-miR-454-3p	NREP
AC104083.1	hsa-miR-301a-3p	NREP
AC104083.1	hsa-miR-301b-3p	NREP
AC104083.1	hsa-miR-16-5p	NREP
AC104083.1	hsa-miR-98-5p	NREP
AC104083.1	hsa-let-7b-5p	IFI44
AC104083.1	hsa-miR-16-5p	IFI44
AC104083.1	hsa-miR-34a-5p	IFI44
AC104083.1	hsa-miR-449a	IFI44
AC104083.1	hsa-miR-19b-3p	IFI44
AC104083.1	hsa-miR-130b-3p	HERC6
AC104083.1	hsa-miR-449a	HERC6
AC104083.1	hsa-miR-301b-3p	HERC6
AC104083.1	hsa-miR-34a-5p	HERC6
AC104083.1	hsa-miR-301a-3p	HERC6
AC104083.1	hsa-miR-30e-3p	HERC5
AC104083.1	hsa-let-7b-5p	HERC5
AC104083.1	hsa-miR-30d-3p	HERC5
AC104083.1	hsa-miR-30a-3p	HERC5
AC104083.1	hsa-miR-9-5p	HERC5
AC104083.1	hsa-miR-16-5p	HERC5
AC104083.1	hsa-miR-449a	HERC5
AC104083.1	hsa-miR-449a	STAC
AC104083.1	hsa-miR-107	STAC
AC104083.1	hsa-miR-103a-3p	STAC
AC104083.1	hsa-miR-19b-3p	FAM13C
AC104083.1	hsa-miR-369-3p	FAM13C
AC104083.1	hsa-miR-19a-3p	FAM13C
AC104083.1	hsa-miR-195-5p	PAFAH2
AC104083.1	hsa-miR-15b-5p	PAFAH2
AC104083.1	hsa-let-7e-5p	PAFAH2
AC104083.1	hsa-miR-16-5p	PAFAH2
AC104083.1	hsa-miR-15a-5p	PAFAH2
AC104083.1	hsa-miR-103a-3p	B3GALT2
AC104083.1	hsa-miR-107	B3GALT2
AC104083.1	hsa-miR-195-5p	B3GALT2
AC104083.1	hsa-miR-21-5p	SERPINI1
AC104083.1	hsa-miR-182-5p	SERPINI1
AC104083.1	hsa-miR-16-5p	SERPINI1
AC104083.1	hsa-miR-107	SERPINI1
AC104083.1	hsa-miR-107	PRRT2
AC104083.1	hsa-miR-103a-3p	PRRT2
AC104083.1	hsa-miR-182-5p	PRRT2
AC104083.1	hsa-miR-9-5p	PRRT2
AC104083.1	hsa-miR-497-5p	PRRT2
AC104083.1	hsa-miR-34a-5p	FAXDC2
AC104083.1	hsa-miR-21-5p	FAXDC2
AC104083.1	hsa-let-7b-5p	DAND5
AC104083.1	hsa-miR-182-5p	DAND5
AC104083.1	hsa-let-7b-5p	MX2
AC104083.1	hsa-miR-16-5p	MX2
AC104083.1	hsa-miR-449a	MX2
AC104083.1	hsa-miR-107	MX2
AC104083.1	hsa-miR-195-5p	MX2
AC104083.1	hsa-miR-34a-5p	MX2
AC104083.1	hsa-let-7b-5p	SLC6A9
AC104083.1	hsa-miR-16-5p	SLC6A9
AC104083.1	hsa-let-7e-5p	SLC6A9
AC104083.1	hsa-let-7f-5p	SLC6A9
AC104083.1	hsa-miR-96-5p	SLC6A9
AC104083.1	hsa-let-7g-5p	SLC6A9
AC104083.1	hsa-let-7a-5p	SLC6A9
AC104083.1	hsa-miR-34a-5p	SLC6A9
AC104083.1	hsa-let-7i-5p	SLC6A9
AC104083.1	hsa-let-7b-5p	COL27A1
AC104083.1	hsa-miR-181a-5p	COL27A1
AC104083.1	hsa-miR-16-5p	COL27A1
AC104083.1	hsa-let-7a-5p	COL27A1
AC104083.1	hsa-miR-126-5p	COL27A1
AC104083.1	hsa-miR-484	COL27A1
AC104083.1	hsa-miR-182-5p	TNFRSF25
AC104083.1	hsa-miR-34a-5p	TNFRSF25
AC104083.1	hsa-let-7b-5p	TNFRSF25
AC104083.1	hsa-miR-181a-5p	C1QTNF9
AL513534.3	hsa-miR-26a-5p	OAS1
AL513534.3	hsa-miR-221-3p	OAS1
AL513534.3	hsa-miR-30d-5p	OAS1
AL513534.3	hsa-miR-106b-5p	OAS2
AL513534.3	hsa-miR-30d-5p	OAS2
AL513534.3	hsa-miR-26b-5p	OAS2
AL513534.3	hsa-miR-221-3p	OAS2
AL513534.3	hsa-miR-26a-5p	OAS2
AL513534.3	hsa-miR-20a-5p	OAS2
AL513534.3	hsa-miR-20a-5p	BTN3A3
AL513534.3	hsa-miR-30d-5p	BTN3A3
AL513534.3	hsa-miR-106b-5p	BTN3A3
AL513534.3	hsa-miR-26b-5p	BTN3A3
AL513534.3	hsa-miR-26b-5p	GBP1
AL513534.3	hsa-miR-26a-5p	GBP1
AL513534.3	hsa-miR-30d-5p	GBP1
AL513534.3	hsa-miR-30d-5p	IFIT2
AL513534.3	hsa-miR-221-3p	IFIT2
AL513534.3	hsa-miR-26a-5p	IFIT2
AL513534.3	hsa-miR-26b-5p	PRRG3
AL513534.3	hsa-miR-221-3p	TRIM22
AL513534.3	hsa-miR-26a-5p	TRIM22
AL513534.3	hsa-miR-26b-5p	TRIM22
AL513534.3	hsa-miR-26b-5p	RSAD2
AL513534.3	hsa-miR-221-3p	RSAD2
AL513534.3	hsa-miR-30d-5p	RSAD2
AL513534.3	hsa-miR-26a-5p	RSAD2
AL513534.3	hsa-miR-26a-5p	CCDC146
AL513534.3	hsa-miR-20a-5p	CCDC146
AL513534.3	hsa-miR-221-3p	IFI44L
AL513534.3	hsa-miR-20a-5p	IFI44L
AL513534.3	hsa-miR-30d-5p	IFI44L
AL513534.3	hsa-miR-26a-5p	IFI44L
AL513534.3	hsa-miR-106b-5p	IFI44L
AL513534.3	hsa-miR-30d-5p	IFI44
AL513534.3	hsa-miR-221-3p	IFI44
AL513534.3	hsa-miR-20a-5p	IFI44
AL513534.3	hsa-miR-26a-5p	IFI44
AL513534.3	hsa-miR-26b-5p	IFI44
AL513534.3	hsa-miR-30a-5p	STAC
AL513534.3	hsa-miR-30e-5p	STAC
AL513534.3	hsa-miR-30b-5p	FAM13C
AL513534.3	hsa-miR-30c-5p	FAM13C
AL513534.3	hsa-miR-340-5p	ANKRD29
AL513534.3	hsa-miR-106b-5p	ANKRD29
AL513534.3	hsa-miR-20a-5p	ANKRD29
AL513534.3	hsa-miR-30d-5p	MX1
AL513534.3	hsa-miR-30a-5p	MX1
AL513534.3	hsa-miR-26a-5p	MX1
AL513534.3	hsa-miR-33b-5p	B3GALT2
AL513534.3	hsa-miR-33a-5p	B3GALT2
AL513534.3	hsa-miR-26a-5p	SAMD9L
AL513534.3	hsa-miR-106b-5p	SAMD9L
AL513534.3	hsa-miR-30d-5p	SAMD9L
AL513534.3	hsa-miR-33a-3p	SAMD9L
AL513534.3	hsa-miR-20a-5p	SAMD9L
AL513534.3	hsa-miR-221-3p	SAMD9L
AL513534.3	hsa-miR-106b-5p	CSRNP3
AL513534.3	hsa-miR-20a-5p	CSRNP3
AL513534.3	hsa-miR-26a-5p	CSRNP3
AL513534.3	hsa-miR-33a-5p	CSRNP3
AL513534.3	hsa-miR-33b-5p	CSRNP3
AL513534.3	hsa-miR-26b-5p	DDX60L
AL513534.3	hsa-miR-221-3p	DDX60L
AL513534.3	hsa-miR-221-3p	MX2
AL513534.3	hsa-miR-26a-5p	MX2
AL513534.3	hsa-miR-30a-5p	MX2
AL513534.3	hsa-miR-26a-5p	LRRC55
AL513534.3	hsa-miR-33b-5p	IFIT1
AL513534.3	hsa-miR-20a-5p	IFIT1
AL513534.3	hsa-miR-26a-5p	IFIT1
AL513534.3	hsa-miR-33a-5p	IFIT1
AL513534.3	hsa-miR-221-3p	IFIT1
AL513534.3	hsa-miR-30d-5p	IFIT1
AL513534.3	hsa-miR-20a-5p	BTN3A2
AL513534.3	hsa-miR-221-3p	BTN3A2
AL513534.3	hsa-miR-106b-5p	BTN3A2
AL513534.3	hsa-miR-30d-5p	ISG15
AL513534.3	hsa-miR-26a-5p	ISG15
AL513534.3	hsa-miR-221-3p	ISG15
AC068473.3	hsa-miR-125a-5p	BTN3A3
AC068473.3	hsa-miR-125b-5p	BTN3A3
AC068473.3	hsa-miR-125b-5p	PTCH2
AC068473.3	hsa-miR-125a-5p	PTCH2
AC068473.3	hsa-miR-125a-5p	ACSS1
AC068473.3	hsa-miR-125b-5p	ACSS1
RPARP-AS1	hsa-miR-34a-5p	TSPAN32
RPARP-AS1	hsa-miR-449a	DHX58
RPARP-AS1	hsa-miR-129-2-3p	DHX58
RPARP-AS1	hsa-miR-129-2-3p	ACCS
RPARP-AS1	hsa-miR-34a-5p	ACCS
RPARP-AS1	hsa-miR-34a-5p	OAS3
RPARP-AS1	hsa-miR-449a	OAS3
RPARP-AS1	hsa-miR-129-2-3p	OAS3
RPARP-AS1	hsa-miR-129-2-3p	LAMA4
RPARP-AS1	hsa-miR-20a-3p	LAMA4
RPARP-AS1	hsa-miR-129-2-3p	IFIT3
RPARP-AS1	hsa-miR-34a-5p	IFIT3
RPARP-AS1	hsa-miR-449a	IFIT3
RPARP-AS1	hsa-miR-129-2-3p	IFIT2
RPARP-AS1	hsa-miR-449a	IFIT2
RPARP-AS1	hsa-miR-34a-5p	IFIT2
RPARP-AS1	hsa-miR-34a-5p	IFI6
RPARP-AS1	hsa-miR-449a	IFI6
RPARP-AS1	hsa-miR-129-2-3p	IFI6
RPARP-AS1	hsa-miR-34a-5p	BST2
RPARP-AS1	hsa-miR-129-2-3p	BST2
RPARP-AS1	hsa-miR-449a	BST2
RPARP-AS1	hsa-miR-34a-5p	IDO1
RPARP-AS1	hsa-miR-449a	IDO1
RPARP-AS1	hsa-miR-129-2-3p	IDO1
RPARP-AS1	hsa-miR-34a-5p	XAF1
RPARP-AS1	hsa-miR-129-2-3p	XAF1
RPARP-AS1	hsa-miR-449a	XAF1
RPARP-AS1	hsa-miR-129-2-3p	EPSTI1
RPARP-AS1	hsa-miR-449a	EPSTI1
RPARP-AS1	hsa-miR-129-2-3p	RSAD2
RPARP-AS1	hsa-miR-449a	RSAD2
RPARP-AS1	hsa-miR-34a-5p	RSAD2
RPARP-AS1	hsa-miR-34a-5p	CMPK2
RPARP-AS1	hsa-miR-449a	CMPK2
RPARP-AS1	hsa-miR-129-2-3p	CMPK2
RPARP-AS1	hsa-miR-449a	RTP4
RPARP-AS1	hsa-miR-129-2-3p	RTP4
RPARP-AS1	hsa-miR-129-2-3p	IFI44
RPARP-AS1	hsa-miR-449a	IFI44
RPARP-AS1	hsa-miR-34a-5p	IFI44
RPARP-AS1	hsa-miR-129-2-3p	MNS1
RPARP-AS1	hsa-miR-34a-5p	MNS1
RPARP-AS1	hsa-miR-129-2-3p	HERC6
RPARP-AS1	hsa-miR-449a	HERC6
RPARP-AS1	hsa-miR-34a-5p	HERC6
RPARP-AS1	hsa-miR-129-2-3p	TAPBPL
RPARP-AS1	hsa-miR-449a	TAPBPL
RPARP-AS1	hsa-miR-34a-5p	NLRC5
RPARP-AS1	hsa-miR-129-2-3p	NLRC5
RPARP-AS1	hsa-miR-129-2-3p	RGS5
RPARP-AS1	hsa-miR-34a-5p	RGS5
RPARP-AS1	hsa-miR-181a-5p	RGS5
RPARP-AS1	hsa-miR-129-2-3p	STAC
RPARP-AS1	hsa-miR-449a	STAC
RPARP-AS1	hsa-miR-129-2-3p	CLEC4F
RPARP-AS1	hsa-miR-129-2-3p	ANKRD29
RPARP-AS1	hsa-miR-34a-5p	ANKRD29
RPARP-AS1	hsa-miR-449a	MX1
RPARP-AS1	hsa-miR-34a-5p	MX1
RPARP-AS1	hsa-miR-129-2-3p	MX1
RPARP-AS1	hsa-miR-33a-5p	PKD1L1
RPARP-AS1	hsa-miR-34a-5p	SLC45A3
RPARP-AS1	hsa-miR-129-2-3p	SLC45A3
RPARP-AS1	hsa-miR-33b-5p	B3GALT2
RPARP-AS1	hsa-miR-33a-5p	B3GALT2
RPARP-AS1	hsa-miR-129-2-3p	B3GALT2
RPARP-AS1	hsa-miR-20a-3p	GBP4
RPARP-AS1	hsa-miR-129-2-3p	GBP4
RPARP-AS1	hsa-miR-449a	GBP4
RPARP-AS1	hsa-miR-129-2-3p	ACP6
RPARP-AS1	hsa-miR-34a-5p	ACP6
RPARP-AS1	hsa-miR-129-2-3p	BATF2
RPARP-AS1	hsa-miR-449a	BATF2
RPARP-AS1	hsa-miR-34a-5p	FAXDC2
RPARP-AS1	hsa-miR-129-2-3p	FAXDC2
RPARP-AS1	hsa-miR-449a	DDX60L
RPARP-AS1	hsa-miR-129-2-3p	DDX60L
RPARP-AS1	hsa-miR-34a-5p	MX2
RPARP-AS1	hsa-miR-449a	MX2
RPARP-AS1	hsa-miR-129-2-3p	MX2
RPARP-AS1	hsa-miR-34a-5p	IFIT1
RPARP-AS1	hsa-miR-33b-5p	IFIT1
RPARP-AS1	hsa-miR-449a	IFIT1
RPARP-AS1	hsa-miR-129-2-3p	IFIT1
RPARP-AS1	hsa-miR-33a-5p	IFIT1
RPARP-AS1	hsa-miR-129-2-3p	CYS1
RPARP-AS1	hsa-miR-34a-5p	TNFRSF25
RPARP-AS1	hsa-miR-129-2-3p	TNFRSF25
RPARP-AS1	hsa-miR-181a-5p	C1QTNF9

## Sheet: tan
Triple network in tan module
lncRNA	miRNA	mRNA
MIAT	hsa-miR-93-5p	RUNX3
MIAT	hsa-miR-20b-5p	RUNX3
MIAT	hsa-miR-17-5p	RUNX3
MIAT	hsa-miR-27a-3p	POU2F2
MIAT	hsa-miR-27b-3p	POU2F2
MIAT	hsa-miR-29b-3p	POU2F2
MIAT	hsa-miR-29a-3p	POU2F2
MIAT	hsa-miR-29c-3p	POU2F2
MIAT	hsa-miR-27a-3p	PRDM1
MIAT	hsa-miR-29c-3p	PRDM1
MIAT	hsa-miR-181a-5p	PRDM1
MIAT	hsa-miR-29b-3p	PRDM1
MIAT	hsa-miR-29a-3p	PRDM1
MIAT	hsa-miR-9-3p	PRDM1
MIAT	hsa-miR-19a-3p	IL2RB
MIAT	hsa-miR-19b-3p	IL2RB
MIAT	hsa-miR-181a-5p	IL2RB
MIAT	hsa-miR-7-5p	IL2RB
MIAT	hsa-miR-27a-3p	IL2RB
MIAT	hsa-miR-27a-3p	GZMH
MIAT	hsa-miR-873-5p	IL21R
MIAT	hsa-miR-7-5p	IL21R
MIAT	hsa-miR-9-3p	IL21R
MIAT	hsa-miR-185-5p	CCR6
MIAT	hsa-miR-181a-5p	CCR6
MIAT	hsa-miR-27a-3p	CCR6
MIAT	hsa-miR-27a-3p	GZMK
MIAT	hsa-miR-19b-3p	SDC1
MIAT	hsa-miR-221-3p	SDC1
MIAT	hsa-miR-19a-3p	SDC1
MIAT	hsa-miR-29c-3p	SDC1
MIAT	hsa-miR-27a-3p	NEK6
MIAT	hsa-miR-29c-3p	NEK6
MIAT	hsa-miR-27b-3p	NEK6
MIAT	hsa-miR-27a-3p	CCR2
MIAT	hsa-miR-27a-3p	RUNX2
MIAT	hsa-miR-29b-3p	RUNX2
MIAT	hsa-miR-19a-3p	RUNX2
MIAT	hsa-miR-19b-3p	RUNX2
MIAT	hsa-miR-320a	RUNX2
MIAT	hsa-miR-93-5p	BCL11B
MIAT	hsa-miR-17-5p	BCL11B
MIAT	hsa-miR-20b-5p	BCL11B
MIAT	hsa-miR-320a	BCL11B
MIAT	hsa-miR-320a	LEF1
MIAT	hsa-miR-93-5p	LEF1
MIAT	hsa-miR-27a-3p	LEF1
MIAT	hsa-miR-22-3p	SKAP1
MIAT	hsa-miR-27a-3p	SKAP1
MIAT	hsa-miR-29c-3p	SKAP1
MIAT	hsa-miR-27a-3p	FCRL5
MIAT	hsa-miR-27a-3p	SCML4
MIAT	hsa-miR-185-5p	CD8A
MIAT	hsa-miR-7-5p	CD8A
MIAT	hsa-miR-93-5p	TAGAP
MIAT	hsa-miR-17-5p	TAGAP
MIAT	hsa-miR-20b-5p	TAGAP
MIAT	hsa-miR-27a-3p	NIBAN3
MIAT	hsa-miR-139-5p	CXCL10
MIAT	hsa-miR-27a-3p	CXCL10
MIAT	hsa-miR-27b-3p	CXCL10
MIAT	hsa-miR-27a-3p	GPR171
MIAT	hsa-miR-17-5p	GPR171
MIAT	hsa-miR-27a-3p	CD3E
AC136475.3	hsa-miR-129-2-3p	TRAF3IP3
AC136475.3	hsa-miR-99b-5p	CD6
AC136475.3	hsa-miR-129-2-3p	ADAM28
AC136475.3	hsa-miR-1224-3p	ATP2A3
AC136475.3	hsa-miR-326	ATP2A3
AC136475.3	hsa-miR-340-3p	ATP2A3
AC136475.3	hsa-miR-129-2-3p	CACNA1I
AC136475.3	hsa-miR-99b-5p	GZMB
AC136475.3	hsa-miR-129-2-3p	KLRB1
AC136475.3	hsa-miR-129-2-3p	ITK
AC136475.3	hsa-miR-129-2-3p	CD2
AC136475.3	hsa-miR-129-2-3p	ZBP1
AC136475.3	hsa-miR-129-2-3p	PSD4
AC136475.3	hsa-miR-24-3p	PSD4
AC136475.3	hsa-miR-129-2-3p	ZMYND15
AC136475.3	hsa-miR-99b-5p	GZMA
AC136475.3	hsa-miR-129-2-3p	GZMA
AC136475.3	hsa-miR-129-2-3p	DPEP2
AC136475.3	hsa-miR-99b-5p	CXCL10
AC136475.3	hsa-miR-129-2-3p	CXCL10
AC136475.3	hsa-miR-129-2-3p	CTSW
AC136475.3	hsa-miR-99b-5p	GAPT
AC136475.3	hsa-miR-99b-5p	HLA-DOA
AC136475.3	hsa-miR-129-2-3p	HLA-DOB
MMP25-AS1	hsa-miR-1-3p	MDK
MMP25-AS1	hsa-miR-940	MDK
MMP25-AS1	hsa-miR-1-3p	LIMD2
MMP25-AS1	hsa-miR-106b-3p	LIMD2
MMP25-AS1	hsa-miR-3180-3p	LIMD2
MMP25-AS1	hsa-miR-940	LIMD2
MMP25-AS1	hsa-miR-1-3p	CD1C
MMP25-AS1	hsa-miR-330-3p	PARP15
MMP25-AS1	hsa-miR-1-3p	TBC1D10C
MMP25-AS1	hsa-miR-330-3p	GAPT
AC004687.1	hsa-miR-877-5p	PIM2
AC004687.1	hsa-miR-877-5p	PTPN22

## Sheet: turquoise
Triple network in turquoise module
lncRNA	miRNA	mRNA
C15orf56	hsa-miR-335-5p	ASB4
C15orf56	hsa-miR-335-5p	USH1C
C15orf56	hsa-miR-335-5p	TKTL1
C15orf56	hsa-miR-335-5p	CYB561
C15orf56	hsa-miR-335-5p	DAPK2
C15orf56	hsa-miR-335-5p	PTPRU
C15orf56	hsa-miR-335-5p	PYGM
C15orf56	hsa-miR-335-5p	ASIC4
C15orf56	hsa-miR-335-5p	CD5L
C15orf56	hsa-miR-335-5p	SNCB
C15orf56	hsa-miR-335-5p	NAALAD2
C15orf56	hsa-miR-335-5p	SLC5A1
C15orf56	hsa-miR-335-5p	GALNT16
C15orf56	hsa-miR-335-5p	FAM189A1
C15orf56	hsa-miR-335-5p	RUNDC3B
C15orf56	hsa-miR-335-5p	RARRES2
C15orf56	hsa-miR-335-5p	CNTNAP3
C15orf56	hsa-miR-335-5p	RNF43
C15orf56	hsa-miR-335-5p	ALDOC
C15orf56	hsa-miR-335-5p	FAM149A
C15orf56	hsa-miR-335-5p	SLC27A6
C15orf56	hsa-miR-335-5p	HRH2
C15orf56	hsa-miR-335-5p	RBP1
C15orf56	hsa-miR-335-5p	ITGB6
C15orf56	hsa-miR-335-5p	RALGPS2
C15orf56	hsa-miR-335-5p	NT5C1A
C15orf56	hsa-miR-335-5p	CA14
C15orf56	hsa-miR-335-5p	CPNE5
C15orf56	hsa-miR-335-5p	EREG
C15orf56	hsa-miR-335-5p	GATA5
C15orf56	hsa-miR-335-5p	DMGDH
C15orf56	hsa-miR-335-5p	LGR6
C15orf56	hsa-miR-335-5p	TMCC2
C15orf56	hsa-miR-335-5p	CHL1
C15orf56	hsa-miR-335-5p	SOX5
C15orf56	hsa-miR-335-5p	PPP1R1A
C15orf56	hsa-miR-335-5p	ARHGEF4
C15orf56	hsa-miR-335-5p	SLC44A5
C15orf56	hsa-miR-335-5p	SLC38A4
C15orf56	hsa-miR-335-5p	TTYH2
C15orf56	hsa-miR-335-5p	RORC
C15orf56	hsa-miR-335-5p	SELENBP1
C15orf56	hsa-miR-335-5p	RNF175
C15orf56	hsa-miR-335-5p	DLG2
C15orf56	hsa-miR-335-5p	MAT1A
C15orf56	hsa-miR-335-5p	TMEM178A
C15orf56	hsa-miR-335-5p	ART3
C15orf56	hsa-miR-335-5p	TNNI1
C15orf56	hsa-miR-335-5p	PLCD3
C15orf56	hsa-miR-335-5p	SCNN1D
C15orf56	hsa-miR-335-5p	PPM1L
C15orf56	hsa-miR-335-5p	DNAJC5G
C15orf56	hsa-miR-335-5p	DNALI1
C15orf56	hsa-miR-335-5p	OTOGL
C15orf56	hsa-miR-335-5p	ACSF2
C15orf56	hsa-miR-335-5p	FAM83B
C15orf56	hsa-miR-335-5p	LRP1B
C15orf56	hsa-miR-335-5p	ROR2
C15orf56	hsa-miR-335-5p	MN1
C15orf56	hsa-miR-335-5p	SH3TC2
C15orf56	hsa-miR-335-5p	REPS2
C15orf56	hsa-miR-335-5p	CEL
C15orf56	hsa-miR-335-5p	SOSTDC1
C15orf56	hsa-miR-335-5p	GPR22
C15orf56	hsa-miR-335-5p	PIFO
C15orf56	hsa-miR-335-5p	CHRNA7
C15orf56	hsa-miR-335-5p	KDF1
C15orf56	hsa-miR-335-5p	FAM216B
C15orf56	hsa-miR-335-5p	AATK
C15orf56	hsa-miR-335-5p	MARCHF11
C15orf56	hsa-miR-335-5p	KLHL32
C15orf56	hsa-miR-335-5p	TRDN
C15orf56	hsa-miR-335-5p	RGS7BP
C15orf56	hsa-miR-335-5p	FYB2
C15orf56	hsa-miR-335-5p	COL4A5
C15orf56	hsa-miR-335-5p	SMTNL2
C15orf56	hsa-miR-335-5p	JAKMIP3
C15orf56	hsa-miR-335-5p	NKAIN2
C15orf56	hsa-miR-335-5p	GREB1
C15orf56	hsa-miR-335-5p	RASGEF1A
C15orf56	hsa-miR-335-5p	RORB
C15orf56	hsa-miR-335-5p	TCEA3
C15orf56	hsa-miR-335-5p	DOK6
C15orf56	hsa-miR-335-5p	TRMT9B
NINJ2-AS1	hsa-miR-24-3p	PANX2
NINJ2-AS1	hsa-miR-24-3p	HLF
NINJ2-AS1	hsa-miR-137	HLF
NINJ2-AS1	hsa-miR-24-3p	HRH2
NINJ2-AS1	hsa-miR-33a-5p	FAM78A
NINJ2-AS1	hsa-miR-24-3p	FAM78A
NINJ2-AS1	hsa-miR-99a-5p	CIB2
NINJ2-AS1	hsa-miR-100-5p	CIB2
NINJ2-AS1	hsa-miR-99b-5p	FEZ1
NINJ2-AS1	hsa-miR-24-3p	FEZ1
NINJ2-AS1	hsa-miR-99a-5p	SLC7A11
NINJ2-AS1	hsa-miR-33a-5p	SLC7A11
NINJ2-AS1	hsa-miR-100-5p	SLC7A11
NINJ2-AS1	hsa-miR-33a-5p	BEND6
NINJ2-AS1	hsa-miR-137	BEND6
NINJ2-AS1	hsa-miR-24-3p	SH3TC2
NINJ2-AS1	hsa-miR-100-5p	KCND3
NINJ2-AS1	hsa-miR-99a-5p	KCND3
NINJ2-AS1	hsa-miR-137	CADM2
NINJ2-AS1	hsa-miR-33a-5p	CADM2
NINJ2-AS1	hsa-miR-24-3p	H2AW
NINJ2-AS1	hsa-miR-99b-5p	H2AW
NINJ2-AS1	hsa-miR-137	KCNQ5
NINJ2-AS1	hsa-miR-33a-5p	KCNQ5
NINJ2-AS1	hsa-miR-99a-5p	RGS9BP
NINJ2-AS1	hsa-miR-100-5p	RGS9BP
NINJ2-AS1	hsa-miR-100-5p	KCNJ11
NINJ2-AS1	hsa-miR-99a-5p	KCNJ11
LINC02716	hsa-miR-146a-5p	ITGA2B
LINC02716	hsa-miR-146a-5p	CACNA2D2
LINC02716	hsa-miR-146a-5p	HFE
LINC02716	hsa-miR-146a-5p	CHDH
LINC02716	hsa-miR-146a-5p	HSF2
LINC02716	hsa-miR-146a-5p	EPN3
LINC02716	hsa-miR-146a-5p	FGFR2
LINC02716	hsa-miR-146a-5p	ISOC1
LINC02716	hsa-miR-146a-5p	PYGM
LINC02716	hsa-miR-146a-5p	KCNN2
LINC02716	hsa-miR-146a-5p	C1QTNF3
LINC02716	hsa-miR-146a-5p	CD82
LINC02716	hsa-miR-146a-5p	PHACTR3
LINC02716	hsa-miR-146a-5p	FOXRED2
LINC02716	hsa-miR-146a-5p	HPN
LINC02716	hsa-miR-146a-5p	GRIK5
LINC02716	hsa-miR-146a-5p	CNTNAP3
LINC02716	hsa-miR-146a-5p	HLF
LINC02716	hsa-miR-146a-5p	ALDOC
LINC02716	hsa-miR-146a-5p	GABRA4
LINC02716	hsa-miR-146a-5p	PHACTR1
LINC02716	hsa-miR-146a-5p	SLC27A6
LINC02716	hsa-miR-146a-5p	RALGPS2
LINC02716	hsa-miR-146a-5p	NT5C1A
LINC02716	hsa-miR-146a-5p	TNFSF4
LINC02716	hsa-miR-146a-5p	CASC1
LINC02716	hsa-miR-146a-5p	GHRH
LINC02716	hsa-miR-146a-5p	KCNIP2
LINC02716	hsa-miR-146a-5p	HIVEP3
LINC02716	hsa-miR-146a-5p	STRIP2
LINC02716	hsa-miR-146a-5p	GATA5
LINC02716	hsa-miR-146a-5p	AC002316.1
LINC02716	hsa-miR-146a-5p	RBM38
LINC02716	hsa-miR-146a-5p	MTUS2
LINC02716	hsa-miR-146a-5p	LGR6
LINC02716	hsa-miR-146a-5p	ARHGEF4
LINC02716	hsa-miR-146a-5p	ADAMTS7
LINC02716	hsa-miR-146a-5p	SLC44A5
LINC02716	hsa-miR-146a-5p	CPNE8
LINC02716	hsa-miR-146a-5p	GNAL
LINC02716	hsa-miR-146a-5p	GAREM1
LINC02716	hsa-miR-146a-5p	TTYH2
LINC02716	hsa-miR-146a-5p	SELENBP1
LINC02716	hsa-miR-146a-5p	DDIT4L
LINC02716	hsa-miR-146a-5p	TIFA
LINC02716	hsa-miR-146a-5p	RNF175
LINC02716	hsa-miR-146a-5p	TRIM7
LINC02716	hsa-miR-146a-5p	SDK1
LINC02716	hsa-miR-146a-5p	MAT1A
LINC02716	hsa-miR-146a-5p	BEND6
LINC02716	hsa-miR-146a-5p	GRID2
LINC02716	hsa-miR-146a-5p	RAB39B
LINC02716	hsa-miR-146a-5p	CACNA1D
LINC02716	hsa-miR-146a-5p	TNNI1
LINC02716	hsa-miR-146a-5p	TFF3
LINC02716	hsa-miR-146a-5p	SSTR5
LINC02716	hsa-miR-146a-5p	SCNN1D
LINC02716	hsa-miR-146a-5p	SLC15A2
LINC02716	hsa-miR-146a-5p	DNALI1
LINC02716	hsa-miR-146a-5p	ADCY1
LINC02716	hsa-miR-146a-5p	PHKG1
LINC02716	hsa-miR-146a-5p	PTER
LINC02716	hsa-miR-146a-5p	RCOR2
LINC02716	hsa-miR-146a-5p	CASKIN1
LINC02716	hsa-miR-146a-5p	LGI3
LINC02716	hsa-miR-146a-5p	TPPP
LINC02716	hsa-miR-146a-5p	SLC16A11
LINC02716	hsa-miR-146a-5p	GAL3ST3
LINC02716	hsa-miR-146a-5p	KDF1
LINC02716	hsa-miR-146a-5p	TSPEAR
LINC02716	hsa-miR-146a-5p	LPCAT4
LINC02716	hsa-miR-146a-5p	GPR35
LINC02716	hsa-miR-146a-5p	WDR97
LINC02716	hsa-miR-146a-5p	FAM216B
LINC02716	hsa-miR-146a-5p	NRXN1
LINC02716	hsa-miR-146a-5p	C1orf105
LINC02716	hsa-miR-146a-5p	H2AW
LINC02716	hsa-miR-146a-5p	AATK
LINC02716	hsa-miR-146a-5p	FAM181B
LINC02716	hsa-miR-146a-5p	DHRS7C
LINC02716	hsa-miR-146a-5p	C14orf180
LINC02716	hsa-miR-146a-5p	RALYL
LINC02716	hsa-miR-146a-5p	SDR42E1
LINC02716	hsa-miR-146a-5p	AGBL4
LINC02716	hsa-miR-146a-5p	RGS9BP
LINC02716	hsa-miR-146a-5p	KCNJ11
LINC02716	hsa-miR-146a-5p	SMTNL2
LINC02716	hsa-miR-146a-5p	JAKMIP3
LINC02716	hsa-miR-146a-5p	NOXA1
LINC02716	hsa-miR-146a-5p	S100A14
LINC02716	hsa-miR-146a-5p	RORB
LINC02716	hsa-miR-146a-5p	FOXO6
LINC02716	hsa-miR-146a-5p	DOK6
LINC02716	hsa-miR-146a-5p	ATP6V1G2
LINC02716	hsa-miR-146a-5p	TENM3
LINC02716	hsa-miR-146a-5p	C1orf226
AC117453.1	hsa-miR-28-5p	CTTNBP2
AC117453.1	hsa-miR-708-5p	CTTNBP2
AC117453.1	hsa-miR-28-5p	ENPP5
AC117453.1	hsa-miR-708-5p	ENPP5
AC117453.1	hsa-miR-28-5p	DLG2
AC117453.1	hsa-miR-708-5p	DLG2
AC117453.1	hsa-miR-28-5p	JAM2
AC117453.1	hsa-miR-708-5p	JAM2
AC117453.1	hsa-miR-708-5p	ATP2B2
AC117453.1	hsa-miR-28-5p	PLCD3
AC117453.1	hsa-miR-708-5p	PLCD3
AC117453.1	hsa-miR-28-5p	ADGRV1
AC117453.1	hsa-miR-708-5p	NSUN7
AC117453.1	hsa-miR-28-5p	NSUN7
RORB-AS1	hsa-miR-382-5p	GABRA4
RORB-AS1	hsa-miR-382-5p	AC002316.1
RORB-AS1	hsa-miR-382-5p	ATP2B2
RORB-AS1	hsa-miR-382-5p	STEAP2
RORB-AS1	hsa-miR-382-5p	KCNQ5
BX284668.2	hsa-miR-34a-5p	ELMOD1
BX284668.2	hsa-miR-221-5p	ELMOD1
BX284668.2	hsa-miR-488-3p	SLC30A3
BX284668.2	hsa-miR-34a-5p	SLC30A3
BX284668.2	hsa-miR-34a-5p	IGFBP5
BX284668.2	hsa-miR-221-5p	IGFBP5
BX284668.2	hsa-miR-99a-5p	IGFBP5
BX284668.2	hsa-miR-211-5p	IGFBP5
BX284668.2	hsa-miR-542-5p	IGFBP5
BX284668.2	hsa-miR-125b-5p	DGKB
BX284668.2	hsa-miR-125a-5p	DGKB
BX284668.2	hsa-miR-99a-5p	CIB2
BX284668.2	hsa-miR-100-5p	CIB2
BX284668.2	hsa-miR-34a-5p	CIB2
BX284668.2	hsa-miR-125a-5p	LMTK3
BX284668.2	hsa-miR-125b-5p	LMTK3
BX284668.2	hsa-miR-3176	GPSM1
BX284668.2	hsa-miR-34a-5p	GPSM1
BX284668.2	hsa-miR-221-5p	GPSM1
BX284668.2	hsa-miR-204-5p	GPSM1
BX284668.2	hsa-miR-328-3p	GPSM1
BX284668.2	hsa-miR-125b-5p	CACNB2
BX284668.2	hsa-miR-125a-5p	CACNB2
BX284668.2	hsa-miR-125a-5p	PLA2G4F
BX284668.2	hsa-miR-125b-5p	PLA2G4F
BX284668.2	hsa-miR-100-5p	KCND3
BX284668.2	hsa-miR-34a-5p	KCND3
BX284668.2	hsa-miR-99a-5p	KCND3
BX284668.2	hsa-miR-34a-5p	LPCAT4
BX284668.2	hsa-miR-15b-3p	LPCAT4
BX284668.2	hsa-miR-100-5p	RGS9BP
BX284668.2	hsa-miR-99a-5p	RGS9BP
PSMG3-AS1	hsa-miR-195-5p	CDH10
PSMG3-AS1	hsa-miR-16-5p	CDH10
PSMG3-AS1	hsa-miR-15a-5p	LAMC2
PSMG3-AS1	hsa-miR-497-5p	LAMC2
PSMG3-AS1	hsa-miR-15b-5p	LAMC2
PSMG3-AS1	hsa-miR-195-5p	LAMC2
PSMG3-AS1	hsa-miR-7-5p	LAMC2
PSMG3-AS1	hsa-miR-15a-5p	ISOC1
PSMG3-AS1	hsa-miR-29b-1-5p	ISOC1
PSMG3-AS1	hsa-miR-7-5p	ISOC1
PSMG3-AS1	hsa-miR-15b-5p	ISOC1
PSMG3-AS1	hsa-miR-16-5p	ISOC1
PSMG3-AS1	hsa-miR-497-5p	ADAM11
PSMG3-AS1	hsa-miR-424-5p	ADAM11
PSMG3-AS1	hsa-miR-15b-5p	SEMA3A
PSMG3-AS1	hsa-miR-16-5p	SEMA3A
PSMG3-AS1	hsa-miR-15a-5p	SEMA3A
PSMG3-AS1	hsa-miR-16-5p	GPC4
PSMG3-AS1	hsa-miR-15a-5p	GPC4
PSMG3-AS1	hsa-miR-15b-5p	GPC4
PSMG3-AS1	hsa-miR-195-5p	GPC4
PSMG3-AS1	hsa-miR-16-5p	CTTNBP2
PSMG3-AS1	hsa-miR-15a-5p	CTTNBP2
PSMG3-AS1	hsa-miR-15b-5p	CTTNBP2
PSMG3-AS1	hsa-miR-424-5p	CTTNBP2
PSMG3-AS1	hsa-miR-497-5p	CTTNBP2
PSMG3-AS1	hsa-miR-214-3p	FOXRED2
PSMG3-AS1	hsa-miR-7-5p	FOXRED2
PSMG3-AS1	hsa-miR-195-5p	FOXRED2
PSMG3-AS1	hsa-miR-15b-5p	RPS6KA5
PSMG3-AS1	hsa-miR-7-5p	RPS6KA5
PSMG3-AS1	hsa-miR-19b-3p	RPS6KA5
PSMG3-AS1	hsa-miR-195-5p	RPS6KA5
PSMG3-AS1	hsa-miR-16-5p	RPS6KA5
PSMG3-AS1	hsa-miR-4726-3p	RPS6KA5
PSMG3-AS1	hsa-miR-15a-5p	RPS6KA5
PSMG3-AS1	hsa-miR-15a-5p	RNF43
PSMG3-AS1	hsa-miR-4690-5p	RNF43
PSMG3-AS1	hsa-miR-15b-5p	RNF43
PSMG3-AS1	hsa-miR-16-5p	RNF43
PSMG3-AS1	hsa-miR-195-5p	RNF43
PSMG3-AS1	hsa-miR-16-5p	ALDOC
PSMG3-AS1	hsa-miR-7-5p	ALDOC
PSMG3-AS1	hsa-miR-195-5p	ALDOC
PSMG3-AS1	hsa-miR-214-3p	ALDOC
PSMG3-AS1	hsa-miR-195-5p	ADAM23
PSMG3-AS1	hsa-miR-15a-5p	ADAM23
PSMG3-AS1	hsa-miR-15b-5p	ADAM23
PSMG3-AS1	hsa-miR-16-5p	ADAM23
PSMG3-AS1	hsa-miR-7-5p	IGFBP5
PSMG3-AS1	hsa-miR-16-5p	IGFBP5
PSMG3-AS1	hsa-miR-15a-5p	IGFBP5
PSMG3-AS1	hsa-miR-34b-5p	IGFBP5
PSMG3-AS1	hsa-miR-195-5p	IGFBP5
PSMG3-AS1	hsa-miR-424-5p	IGFBP5
PSMG3-AS1	hsa-miR-15b-5p	IGFBP5
PSMG3-AS1	hsa-miR-16-5p	GDA
PSMG3-AS1	hsa-miR-574-5p	GDA
PSMG3-AS1	hsa-miR-19b-3p	GDA
PSMG3-AS1	hsa-miR-7-5p	GDA
PSMG3-AS1	hsa-miR-497-5p	POF1B
PSMG3-AS1	hsa-miR-195-5p	POF1B
PSMG3-AS1	hsa-miR-34b-5p	STRIP2
PSMG3-AS1	hsa-miR-16-5p	STRIP2
PSMG3-AS1	hsa-miR-214-3p	STRIP2
PSMG3-AS1	hsa-miR-331-5p	PRKAB2
PSMG3-AS1	hsa-miR-15a-5p	PRKAB2
PSMG3-AS1	hsa-miR-15b-5p	PRKAB2
PSMG3-AS1	hsa-miR-16-5p	PRKAB2
PSMG3-AS1	hsa-miR-424-5p	PRKAB2
PSMG3-AS1	hsa-miR-27b-5p	PRKAB2
PSMG3-AS1	hsa-miR-497-5p	PRKAB2
PSMG3-AS1	hsa-miR-195-5p	PRKAB2
PSMG3-AS1	hsa-miR-19b-3p	AC002316.1
PSMG3-AS1	hsa-miR-424-5p	AC002316.1
PSMG3-AS1	hsa-miR-7-5p	AC002316.1
PSMG3-AS1	hsa-miR-15b-5p	SOX5
PSMG3-AS1	hsa-miR-195-5p	SOX5
PSMG3-AS1	hsa-miR-16-5p	SOX5
PSMG3-AS1	hsa-miR-15a-5p	SOX5
PSMG3-AS1	hsa-miR-16-5p	ARHGEF4
PSMG3-AS1	hsa-miR-27b-5p	ARHGEF4
PSMG3-AS1	hsa-miR-16-5p	SLC44A5
PSMG3-AS1	hsa-miR-7-5p	SLC44A5
PSMG3-AS1	hsa-miR-214-3p	SLC44A5
PSMG3-AS1	hsa-miR-15a-5p	BARD1
PSMG3-AS1	hsa-miR-15b-5p	BARD1
PSMG3-AS1	hsa-miR-16-5p	BARD1
PSMG3-AS1	hsa-miR-195-5p	BARD1
PSMG3-AS1	hsa-miR-34b-5p	SLC38A4
PSMG3-AS1	hsa-miR-424-5p	SLC38A4
PSMG3-AS1	hsa-miR-19b-3p	FGF7
PSMG3-AS1	hsa-miR-15a-5p	FGF7
PSMG3-AS1	hsa-miR-195-5p	GAREM1
PSMG3-AS1	hsa-miR-424-5p	GAREM1
PSMG3-AS1	hsa-miR-16-5p	GAREM1
PSMG3-AS1	hsa-miR-15b-5p	GAREM1
PSMG3-AS1	hsa-miR-15a-5p	GAREM1
PSMG3-AS1	hsa-miR-195-5p	SLC44A3
PSMG3-AS1	hsa-miR-16-5p	SLC44A3
PSMG3-AS1	hsa-miR-195-5p	CELSR2
PSMG3-AS1	hsa-miR-15a-5p	CELSR2
PSMG3-AS1	hsa-miR-3943	CELSR2
PSMG3-AS1	hsa-miR-15b-5p	CELSR2
PSMG3-AS1	hsa-miR-16-5p	CELSR2
PSMG3-AS1	hsa-miR-497-5p	CELSR2
PSMG3-AS1	hsa-miR-15b-5p	SUSD4
PSMG3-AS1	hsa-miR-15a-5p	SUSD4
PSMG3-AS1	hsa-miR-424-5p	SUSD4
PSMG3-AS1	hsa-miR-214-3p	PXDNL
PSMG3-AS1	hsa-miR-7-5p	CABLES2
PSMG3-AS1	hsa-miR-195-5p	CABLES2
PSMG3-AS1	hsa-miR-16-5p	CABLES2
PSMG3-AS1	hsa-miR-214-3p	CABLES2
PSMG3-AS1	hsa-miR-16-5p	BCL2L11
PSMG3-AS1	hsa-miR-34b-5p	BCL2L11
PSMG3-AS1	hsa-miR-3943	BCL2L11
PSMG3-AS1	hsa-miR-339-5p	BCL2L11
PSMG3-AS1	hsa-miR-15a-5p	BCL2L11
PSMG3-AS1	hsa-miR-214-3p	BCL2L11
PSMG3-AS1	hsa-miR-146b-3p	BCL2L11
PSMG3-AS1	hsa-miR-195-5p	BCL2L11
PSMG3-AS1	hsa-miR-19b-3p	BCL2L11
PSMG3-AS1	hsa-miR-497-5p	BCL2L11
PSMG3-AS1	hsa-miR-424-5p	BCL2L11
PSMG3-AS1	hsa-miR-574-5p	BCL2L11
PSMG3-AS1	hsa-miR-15b-5p	CACNA2D3
PSMG3-AS1	hsa-miR-15a-5p	CACNA2D3
PSMG3-AS1	hsa-miR-16-5p	CACNA2D3
PSMG3-AS1	hsa-miR-195-5p	SLC16A14
PSMG3-AS1	hsa-miR-15a-5p	SLC16A14
PSMG3-AS1	hsa-miR-15b-5p	SLC16A14
PSMG3-AS1	hsa-miR-16-5p	SLC16A14
PSMG3-AS1	hsa-miR-16-5p	GABRB1
PSMG3-AS1	hsa-miR-195-5p	GABRB1
PSMG3-AS1	hsa-miR-16-5p	KIAA0895
PSMG3-AS1	hsa-miR-7-5p	KIAA0895
PSMG3-AS1	hsa-miR-195-5p	KIAA0895
PSMG3-AS1	hsa-miR-424-5p	KIAA0895
PSMG3-AS1	hsa-miR-15b-5p	KIAA0895
PSMG3-AS1	hsa-miR-2115-5p	COG5
PSMG3-AS1	hsa-miR-16-5p	COG5
PSMG3-AS1	hsa-miR-29b-1-5p	COG5
PSMG3-AS1	hsa-miR-19b-3p	COG5
PSMG3-AS1	hsa-miR-214-3p	OTOGL
PSMG3-AS1	hsa-miR-146b-3p	OTOGL
PSMG3-AS1	hsa-miR-16-5p	MN1
PSMG3-AS1	hsa-miR-19b-3p	MN1
PSMG3-AS1	hsa-miR-15a-5p	MN1
PSMG3-AS1	hsa-miR-7-5p	MN1
PSMG3-AS1	hsa-miR-16-5p	MTSS1
PSMG3-AS1	hsa-miR-7-5p	MTSS1
PSMG3-AS1	hsa-miR-15b-5p	CADM2
PSMG3-AS1	hsa-miR-7-5p	CADM2
PSMG3-AS1	hsa-miR-34b-5p	CADM2
PSMG3-AS1	hsa-miR-19b-3p	CADM2
PSMG3-AS1	hsa-miR-195-5p	CADM2
PSMG3-AS1	hsa-miR-15b-5p	NR2F1
PSMG3-AS1	hsa-miR-16-5p	NR2F1
PSMG3-AS1	hsa-miR-195-5p	NR2F1
PSMG3-AS1	hsa-miR-15a-5p	NR2F1
PSMG3-AS1	hsa-miR-497-5p	NR2F1
PSMG3-AS1	hsa-miR-424-5p	GEMIN4
PSMG3-AS1	hsa-miR-15a-5p	GEMIN4
PSMG3-AS1	hsa-miR-497-5p	GEMIN4
PSMG3-AS1	hsa-miR-16-5p	GEMIN4
PSMG3-AS1	hsa-miR-15b-5p	GEMIN4
PSMG3-AS1	hsa-miR-15a-5p	H2AW
PSMG3-AS1	hsa-miR-15b-5p	H2AW
PSMG3-AS1	hsa-miR-424-5p	H2AW
PSMG3-AS1	hsa-miR-16-5p	H2AW
PSMG3-AS1	hsa-miR-214-3p	H2AW
PSMG3-AS1	hsa-miR-16-5p	RGS6
PSMG3-AS1	hsa-miR-195-5p	RGS6
PSMG3-AS1	hsa-miR-424-5p	KCNQ5
PSMG3-AS1	hsa-miR-497-5p	KCNQ5
PSMG3-AS1	hsa-miR-4726-3p	KCNQ5
PSMG3-AS1	hsa-miR-19b-3p	KCNQ5
PSMG3-AS1	hsa-miR-497-5p	DNER
PSMG3-AS1	hsa-miR-16-5p	DNER
PSMG3-AS1	hsa-miR-15b-5p	DNER
PSMG3-AS1	hsa-miR-195-5p	DNER
PSMG3-AS1	hsa-miR-15a-5p	DNER
PSMG3-AS1	hsa-miR-7-5p	DNER
PSMG3-AS1	hsa-miR-195-5p	COL4A5
PSMG3-AS1	hsa-miR-16-5p	COL4A5
PSMG3-AS1	hsa-miR-15b-5p	COL4A5
PSMG3-AS1	hsa-miR-15a-5p	COL4A5
PSMG3-AS1	hsa-miR-19b-3p	NKAIN2
PSMG3-AS1	hsa-miR-195-5p	NKAIN2
PSMG3-AS1	hsa-miR-7-5p	S100A14
PSMG3-AS1	hsa-miR-26b-3p	S100A14
PSMG3-AS1	hsa-miR-19b-3p	GREB1
PSMG3-AS1	hsa-miR-15b-5p	GREB1
PSMG3-AS1	hsa-miR-195-5p	GREB1
PSMG3-AS1	hsa-miR-16-5p	GREB1
PSMG3-AS1	hsa-miR-15a-5p	GREB1
PSMG3-AS1	hsa-miR-424-5p	ZNF33B
PSMG3-AS1	hsa-miR-15b-5p	ZNF33B
PSMG3-AS1	hsa-miR-15a-5p	ZNF33B
PSMG3-AS1	hsa-miR-16-5p	ZNF33B
PSMG3-AS1	hsa-miR-331-5p	ZNF33B
PSMG3-AS1	hsa-miR-195-5p	BLM
PSMG3-AS1	hsa-miR-214-3p	BLM
PSMG3-AS1	hsa-miR-7-5p	BLM
PSMG3-AS1	hsa-miR-16-5p	BLM
PSMG3-AS1	hsa-miR-497-5p	DLL1
PSMG3-AS1	hsa-miR-424-5p	DLL1
PSMG3-AS1	hsa-miR-15b-5p	DLL1
PSMG3-AS1	hsa-miR-15a-5p	DLL1
PSMG3-AS1	hsa-miR-16-5p	DLL1
PSMG3-AS1	hsa-miR-195-5p	DLL1
PSMG3-AS1	hsa-miR-7-5p	FOXO6
PSMG3-AS1	hsa-miR-16-5p	FOXO6
PSMG3-AS1	hsa-miR-424-5p	PEG10
PSMG3-AS1	hsa-miR-4690-5p	PEG10
PSMG3-AS1	hsa-miR-19b-3p	PEG10
PSMG3-AS1	hsa-miR-16-5p	PEG10
PSMG3-AS1	hsa-miR-15a-5p	PEG10
PSMG3-AS1	hsa-miR-195-5p	PEG10
PSMG3-AS1	hsa-miR-7-5p	PEG10
PSMG3-AS1	hsa-miR-15b-5p	PEG10
PSMG3-AS1	hsa-miR-4726-3p	PEG10
PSMG3-AS1	hsa-miR-497-5p	PEG10
PSMG3-AS1	hsa-miR-424-5p	FRRS1L
PSMG3-AS1	hsa-miR-15a-5p	FRRS1L
PSMG3-AS1	hsa-miR-195-5p	FRRS1L
PSMG3-AS1	hsa-miR-195-5p	TMEM178B
PSMG3-AS1	hsa-miR-497-5p	TMEM178B
PSMG3-AS1	hsa-miR-15b-5p	TMEM178B
PSMG3-AS1	hsa-miR-15a-5p	TMEM178B
PSMG3-AS1	hsa-miR-16-5p	TMEM178B
LINC01814	hsa-miR-192-5p	CHDH
LINC01814	hsa-miR-192-5p	IL17RB
LINC01814	hsa-miR-192-5p	GPC4
LINC01814	hsa-miR-192-5p	RAP1GAP
LINC01814	hsa-miR-192-5p	FERMT1
LINC01814	hsa-miR-192-5p	CNTNAP3
LINC01814	hsa-miR-149-5p	ARHGEF4
LINC01814	hsa-miR-192-5p	CIB2
LINC01814	hsa-miR-192-5p	PAK6
LINC01814	hsa-miR-192-5p	CYP4V2
LINC01814	hsa-miR-149-5p	CABLES2
LINC01814	hsa-miR-149-5p	ELAVL4
LINC01814	hsa-miR-149-5p	C1orf115
LINC01814	hsa-miR-149-5p	SLC15A2
LINC01814	hsa-miR-149-5p	CACNB2
LINC01814	hsa-miR-192-5p	MTSS1
LINC01814	hsa-miR-192-5p	ZNF273
LINC01844	hsa-miR-129-5p	ENOSF1
LINC01844	hsa-miR-129-5p	NR2F1
LINC00844	hsa-miR-30c-5p	CYB561
LINC00844	hsa-miR-30b-5p	CYB561
LINC00844	hsa-miR-30c-5p	HSF2
LINC00844	hsa-miR-30b-5p	HSF2
LINC00844	hsa-miR-30c-5p	SEMA3A
LINC00844	hsa-miR-30b-5p	SEMA3A
LINC00844	hsa-miR-30c-5p	CTTNBP2
LINC00844	hsa-miR-30b-5p	CTTNBP2
LINC00844	hsa-miR-30b-5p	RBFOX1
LINC00844	hsa-miR-30c-5p	RBFOX1
LINC00844	hsa-miR-30c-5p	HLF
LINC00844	hsa-miR-30b-5p	HLF
LINC00844	hsa-miR-30c-5p	ENPP5
LINC00844	hsa-miR-30b-5p	ENPP5
LINC00844	hsa-miR-135a-5p	CNTN3
LINC00844	hsa-miR-30c-5p	RALGPS2
LINC00844	hsa-miR-30b-5p	RALGPS2
LINC00844	hsa-miR-30b-5p	CHL1
LINC00844	hsa-miR-30c-5p	CHL1
LINC00844	hsa-miR-30b-5p	TSPAN2
LINC00844	hsa-miR-30c-5p	TSPAN2
LINC00844	hsa-miR-30b-5p	SLC44A5
LINC00844	hsa-miR-30c-5p	SLC44A5
LINC00844	hsa-miR-30c-5p	CPNE8
LINC00844	hsa-miR-30b-5p	CPNE8
LINC00844	hsa-miR-30b-5p	CDH13
LINC00844	hsa-miR-30c-5p	CDH13
LINC00844	hsa-miR-30b-5p	TIFA
LINC00844	hsa-miR-30c-5p	TIFA
LINC00844	hsa-miR-30b-5p	FAM124A
LINC00844	hsa-miR-30c-5p	FAM124A
LINC00844	hsa-miR-30c-5p	SLC7A11
LINC00844	hsa-miR-30b-5p	SLC7A11
LINC00844	hsa-miR-30b-5p	FAM81A
LINC00844	hsa-miR-30c-5p	FAM81A
LINC00844	hsa-miR-30c-5p	GABRB1
LINC00844	hsa-miR-30b-5p	GABRB1
LINC00844	hsa-miR-135a-5p	HCN1
LINC00844	hsa-miR-30c-5p	TPPP
LINC00844	hsa-miR-30b-5p	TPPP
LINC00844	hsa-miR-135a-5p	CADM2
LINC00844	hsa-miR-30c-5p	CADM2
LINC00844	hsa-miR-30b-5p	CADM2
LINC00844	hsa-miR-30b-5p	NRXN1
LINC00844	hsa-miR-30c-5p	NRXN1
LINC00844	hsa-miR-135a-5p	RALYL
LINC00844	hsa-miR-30c-5p	GABRA5
LINC00844	hsa-miR-30b-5p	GABRA5
LINC00844	hsa-miR-30c-5p	SBK1
LINC00844	hsa-miR-30b-5p	SBK1
LINC00844	hsa-miR-30c-5p	JAKMIP3
LINC00844	hsa-miR-30b-5p	JAKMIP3
LINC00844	hsa-miR-30b-5p	DOK6
LINC00844	hsa-miR-30c-5p	DOK6
DNAJC3-DT	hsa-miR-137	ADAM22
DNAJC3-DT	hsa-miR-365b-3p	ADAM22
DNAJC3-DT	hsa-miR-365a-3p	ADAM22
DNAJC3-DT	hsa-miR-142-3p	ADAM22
DNAJC3-DT	hsa-miR-26a-5p	EPN3
DNAJC3-DT	hsa-miR-200b-3p	EPN3
DNAJC3-DT	hsa-miR-628-3p	ISOC1
DNAJC3-DT	hsa-miR-200c-3p	ISOC1
DNAJC3-DT	hsa-miR-200b-3p	ISOC1
DNAJC3-DT	hsa-miR-369-3p	RBFOX1
DNAJC3-DT	hsa-miR-181a-5p	RBFOX1
DNAJC3-DT	hsa-miR-26b-5p	CD82
DNAJC3-DT	hsa-miR-26a-5p	CD82
DNAJC3-DT	hsa-miR-200c-3p	CD82
DNAJC3-DT	hsa-miR-92a-3p	BMP7
DNAJC3-DT	hsa-miR-32-5p	BMP7
DNAJC3-DT	hsa-miR-137	BMP7
DNAJC3-DT	hsa-miR-26a-5p	BMP7
DNAJC3-DT	hsa-miR-181a-5p	FERMT1
DNAJC3-DT	hsa-miR-200c-3p	FERMT1
DNAJC3-DT	hsa-miR-365a-3p	PIP5K1B
DNAJC3-DT	hsa-miR-365b-3p	PIP5K1B
DNAJC3-DT	hsa-miR-32-5p	RNF43
DNAJC3-DT	hsa-miR-19b-1-5p	RNF43
DNAJC3-DT	hsa-miR-19a-5p	RNF43
DNAJC3-DT	hsa-miR-26a-5p	GABRA4
DNAJC3-DT	hsa-miR-181a-5p	GABRA4
DNAJC3-DT	hsa-miR-369-3p	GABRA4
DNAJC3-DT	hsa-miR-186-3p	ENPP5
DNAJC3-DT	hsa-miR-200c-3p	ENPP5
DNAJC3-DT	hsa-miR-369-3p	ENPP5
DNAJC3-DT	hsa-miR-574-5p	ENPP5
DNAJC3-DT	hsa-miR-200b-3p	SLC27A6
DNAJC3-DT	hsa-miR-26b-5p	SLC27A6
DNAJC3-DT	hsa-miR-369-3p	CNTN3
DNAJC3-DT	hsa-miR-137	CNTN3
DNAJC3-DT	hsa-miR-26b-5p	SERPINI2
DNAJC3-DT	hsa-miR-26a-5p	GRB14
DNAJC3-DT	hsa-miR-26b-5p	GRB14
DNAJC3-DT	hsa-miR-200c-3p	GRB14
DNAJC3-DT	hsa-miR-365b-3p	GDA
DNAJC3-DT	hsa-miR-574-5p	GDA
DNAJC3-DT	hsa-miR-181a-5p	GDA
DNAJC3-DT	hsa-miR-365a-3p	GDA
DNAJC3-DT	hsa-miR-628-3p	GDA
DNAJC3-DT	hsa-miR-26a-5p	GDA
DNAJC3-DT	hsa-miR-26b-5p	TRIM6
DNAJC3-DT	hsa-miR-32-5p	TRIM6
DNAJC3-DT	hsa-miR-200b-3p	GRIA3
DNAJC3-DT	hsa-miR-137	GRIA3
DNAJC3-DT	hsa-miR-26a-5p	GRIA3
DNAJC3-DT	hsa-miR-200c-3p	GRIA3
DNAJC3-DT	hsa-miR-181a-5p	CHL1
DNAJC3-DT	hsa-miR-365a-3p	CHL1
DNAJC3-DT	hsa-miR-369-3p	CHL1
DNAJC3-DT	hsa-miR-365b-3p	CHL1
DNAJC3-DT	hsa-miR-628-5p	TRIM45
DNAJC3-DT	hsa-miR-186-3p	TRIM45
DNAJC3-DT	hsa-miR-26b-5p	BARD1
DNAJC3-DT	hsa-miR-181c-5p	BARD1
DNAJC3-DT	hsa-miR-181a-5p	BARD1
DNAJC3-DT	hsa-miR-26a-5p	BARD1
DNAJC3-DT	hsa-miR-92a-3p	SLC40A1
DNAJC3-DT	hsa-miR-137	SLC40A1
DNAJC3-DT	hsa-miR-32-5p	SLC40A1
DNAJC3-DT	hsa-miR-200c-3p	ASXL3
DNAJC3-DT	hsa-miR-200b-3p	ASXL3
DNAJC3-DT	hsa-miR-26b-5p	ASXL3
DNAJC3-DT	hsa-miR-200b-3p	GAREM1
DNAJC3-DT	hsa-miR-92a-3p	GAREM1
DNAJC3-DT	hsa-miR-32-5p	GAREM1
DNAJC3-DT	hsa-miR-200c-3p	SELENBP1
DNAJC3-DT	hsa-miR-26b-5p	SELENBP1
DNAJC3-DT	hsa-miR-19b-1-5p	ZNF711
DNAJC3-DT	hsa-miR-19a-5p	ZNF711
DNAJC3-DT	hsa-miR-26a-5p	ZNF711
DNAJC3-DT	hsa-miR-26b-5p	ZNF711
DNAJC3-DT	hsa-miR-200b-3p	ZNF711
DNAJC3-DT	hsa-miR-628-3p	ZNF711
DNAJC3-DT	hsa-miR-200c-3p	ZNF711
DNAJC3-DT	hsa-miR-181a-5p	ZNF711
DNAJC3-DT	hsa-miR-181c-5p	ZNF711
DNAJC3-DT	hsa-miR-26b-5p	SLC7A11
DNAJC3-DT	hsa-miR-200c-3p	SLC7A11
DNAJC3-DT	hsa-miR-181a-5p	SLC7A11
DNAJC3-DT	hsa-miR-92a-3p	SLC7A11
DNAJC3-DT	hsa-miR-142-3p	SLC7A11
DNAJC3-DT	hsa-miR-181c-5p	SLC7A11
DNAJC3-DT	hsa-miR-26a-5p	SLC7A11
DNAJC3-DT	hsa-miR-92a-3p	PTPRD
DNAJC3-DT	hsa-miR-369-3p	PTPRD
DNAJC3-DT	hsa-miR-200c-3p	PTPRD
DNAJC3-DT	hsa-miR-200b-3p	PTPRD
DNAJC3-DT	hsa-miR-26a-5p	PTPRD
DNAJC3-DT	hsa-miR-32-5p	PTPRD
DNAJC3-DT	hsa-miR-365a-3p	KCNJ3
DNAJC3-DT	hsa-miR-369-3p	KCNJ3
DNAJC3-DT	hsa-miR-365b-3p	KCNJ3
DNAJC3-DT	hsa-miR-19b-1-5p	SLC15A2
DNAJC3-DT	hsa-miR-19a-5p	SLC15A2
DNAJC3-DT	hsa-miR-26a-5p	CACNB2
DNAJC3-DT	hsa-miR-26b-5p	CACNB2
DNAJC3-DT	hsa-miR-369-3p	GABRB3
DNAJC3-DT	hsa-miR-574-5p	GABRB3
DNAJC3-DT	hsa-miR-26b-5p	GABRB3
DNAJC3-DT	hsa-miR-26b-5p	ACSF2
DNAJC3-DT	hsa-miR-26a-5p	ACSF2
DNAJC3-DT	hsa-miR-26b-5p	LRP1B
DNAJC3-DT	hsa-miR-628-5p	LRP1B
DNAJC3-DT	hsa-miR-369-3p	STXBP6
DNAJC3-DT	hsa-miR-365b-3p	STXBP6
DNAJC3-DT	hsa-miR-365a-3p	STXBP6
DNAJC3-DT	hsa-miR-26a-5p	STXBP6
DNAJC3-DT	hsa-miR-181c-5p	P2RY1
DNAJC3-DT	hsa-miR-19b-1-5p	P2RY1
DNAJC3-DT	hsa-miR-181a-5p	P2RY1
DNAJC3-DT	hsa-miR-19a-5p	P2RY1
DNAJC3-DT	hsa-miR-26b-5p	TPPP
DNAJC3-DT	hsa-miR-92a-3p	TPPP
DNAJC3-DT	hsa-miR-32-5p	TPPP
DNAJC3-DT	hsa-miR-142-3p	KCND3
DNAJC3-DT	hsa-miR-200c-3p	KCND3
DNAJC3-DT	hsa-miR-200c-3p	SPTLC3
DNAJC3-DT	hsa-miR-26a-5p	SPTLC3
DNAJC3-DT	hsa-miR-369-3p	CADM2
DNAJC3-DT	hsa-miR-137	CADM2
DNAJC3-DT	hsa-miR-26a-5p	CADM2
DNAJC3-DT	hsa-miR-181a-5p	CADM2
DNAJC3-DT	hsa-miR-137	NRXN1
DNAJC3-DT	hsa-miR-369-3p	NRXN1
DNAJC3-DT	hsa-miR-26a-5p	NRXN1
DNAJC3-DT	hsa-miR-574-5p	NRXN1
DNAJC3-DT	hsa-miR-181a-5p	NRXN1
DNAJC3-DT	hsa-miR-181a-5p	KCNQ5
DNAJC3-DT	hsa-miR-137	KCNQ5
DNAJC3-DT	hsa-miR-181c-5p	KCNQ5
DNAJC3-DT	hsa-miR-365a-3p	S100A14
DNAJC3-DT	hsa-miR-26a-5p	S100A14
DNAJC3-DT	hsa-miR-26b-5p	MYBPC1
DNAJC3-DT	hsa-miR-200c-3p	GREB1
DNAJC3-DT	hsa-miR-26a-5p	GREB1
DNAJC3-DT	hsa-miR-200b-3p	GREB1
DNAJC3-DT	hsa-miR-26b-5p	GREB1
DNAJC3-DT	hsa-miR-26b-5p	BLM
DNAJC3-DT	hsa-miR-26a-5p	BLM
DNAJC3-DT	hsa-miR-628-5p	BLM
DNAJC3-DT	hsa-miR-181a-5p	ZNF273
DNAJC3-DT	hsa-miR-26a-5p	ZNF273
DNAJC3-DT	hsa-miR-181c-5p	ZNF273
DNAJC3-DT	hsa-miR-181a-5p	RORB
DNAJC3-DT	hsa-miR-181c-5p	RORB
DNAJC3-DT	hsa-miR-26b-5p	RORB
DNAJC3-DT	hsa-miR-369-3p	RORB
AC037441.1	hsa-miR-221-5p	ELMOD1
AC037441.1	hsa-miR-221-5p	CASKIN1
AC037441.1	hsa-miR-221-5p	AATK
AC037441.1	hsa-miR-221-5p	NOXA1
LINC02432	hsa-miR-375	CACNA1G
LINC02432	hsa-miR-582-5p	GNAO1
LINC02432	hsa-miR-185-3p	GNAO1
LINC02432	hsa-miR-194-5p	TESC
LINC02432	hsa-miR-124-3p	TESC
LINC02432	hsa-miR-124-3p	CHADL
LINC02432	hsa-miR-185-3p	FAM189A1
LINC02432	hsa-miR-582-5p	FAM189A1
LINC02432	hsa-miR-124-3p	KNG1
LINC02432	hsa-miR-194-5p	EREG
LINC02432	hsa-miR-124-3p	EREG
LINC02432	hsa-miR-382-5p	AC002316.1
LINC02432	hsa-miR-124-3p	AC002316.1
LINC02432	hsa-miR-124-3p	BHMT2
LINC02432	hsa-miR-124-3p	PPP1R1A
LINC02432	hsa-miR-125a-5p	DGKB
LINC02432	hsa-miR-125b-5p	DGKB
LINC02432	hsa-miR-124-3p	PLA2G12B
LINC02432	hsa-miR-124-3p	TMEM132B
LINC02432	hsa-miR-194-5p	TMEM132B
LINC02432	hsa-miR-124-3p	SORD
LINC02432	hsa-miR-194-5p	SORD
LINC02432	hsa-miR-125a-5p	CDH13
LINC02432	hsa-miR-125b-5p	CDH13
LINC02432	hsa-miR-125a-5p	LMTK3
LINC02432	hsa-miR-125b-5p	LMTK3
LINC02432	hsa-miR-124-3p	CELSR2
LINC02432	hsa-miR-185-3p	CELSR2
LINC02432	hsa-miR-194-5p	CELSR2
LINC02432	hsa-miR-124-3p	SELENBP1
LINC02432	hsa-miR-194-5p	SELENBP1
LINC02432	hsa-miR-124-3p	CYP4V2
LINC02432	hsa-miR-194-5p	CYP4V2
LINC02432	hsa-miR-382-5p	PTPRD
LINC02432	hsa-miR-125a-5p	PTPRD
LINC02432	hsa-miR-125b-5p	PTPRD
LINC02432	hsa-miR-375	KCNJ3
LINC02432	hsa-miR-125a-5p	KCNJ3
LINC02432	hsa-miR-125b-5p	KCNJ3
LINC02432	hsa-miR-1299	TLR3
LINC02432	hsa-miR-124-3p	TLR3
LINC02432	hsa-miR-125b-5p	CACNB2
LINC02432	hsa-miR-125a-5p	CACNB2
LINC02432	hsa-miR-125a-5p	PLA2G4F
LINC02432	hsa-miR-125b-5p	PLA2G4F
LINC02432	hsa-miR-375	SPTLC3
LINC02432	hsa-miR-124-3p	SPTLC3
LINC02432	hsa-miR-339-5p	AGBL4
LINC02432	hsa-miR-375	TRDN
LINC02432	hsa-miR-194-5p	TRDN
LINC02432	hsa-miR-375	SMIM5
LINC00964	hsa-miR-34a-5p	ITGA2B
LINC00964	hsa-miR-34a-5p	ASB4
LINC00964	hsa-miR-34a-5p	USH1C
LINC00964	hsa-miR-34a-5p	ADAM22
LINC00964	hsa-miR-34a-5p	CYB561
LINC00964	hsa-miR-34a-5p	SYT13
LINC00964	hsa-miR-34a-5p	CDH10
LINC00964	hsa-miR-34a-5p	IL17RB
LINC00964	hsa-miR-34a-5p	LAMC2
LINC00964	hsa-miR-34a-5p	PTPRU
LINC00964	hsa-miR-34a-5p	NTHL1
LINC00964	hsa-miR-34a-5p	FGFR2
LINC00964	hsa-miR-34a-5p	ISOC1
LINC00964	hsa-miR-34a-5p	CLEC2D
LINC00964	hsa-miR-34a-5p	RAP1GAP
LINC00964	hsa-miR-34a-5p	AKR1B1
LINC00964	hsa-miR-34a-5p	GNAO1
LINC00964	hsa-miR-34a-5p	FOXRED2
LINC00964	hsa-miR-34a-5p	BMP7
LINC00964	hsa-miR-34a-5p	FERMT1
LINC00964	hsa-miR-34a-5p	CNTNAP3
LINC00964	hsa-miR-34a-5p	PIP5K1B
LINC00964	hsa-miR-34a-5p	ELMOD1
LINC00964	hsa-miR-34a-5p	SLC30A3
LINC00964	hsa-miR-34a-5p	RALGPS2
LINC00964	hsa-miR-34a-5p	PRDX1
LINC00964	hsa-miR-34a-5p	GDA
LINC00964	hsa-miR-34a-5p	TRIM6
LINC00964	hsa-miR-34a-5p	EREG
LINC00964	hsa-miR-34a-5p	STRIP2
LINC00964	hsa-miR-34a-5p	C1QL1
LINC00964	hsa-miR-34a-5p	RBM38
LINC00964	hsa-miR-34a-5p	DMGDH
LINC00964	hsa-miR-34a-5p	SOX5
LINC00964	hsa-miR-34a-5p	CCNJL
LINC00964	hsa-miR-34a-5p	CIB2
LINC00964	hsa-miR-34a-5p	SLC44A5
LINC00964	hsa-miR-34a-5p	BARD1
LINC00964	hsa-miR-34a-5p	SLC40A1
LINC00964	hsa-miR-34a-5p	FGF7
LINC00964	hsa-miR-34a-5p	GAREM1
LINC00964	hsa-miR-34a-5p	SELENBP1
LINC00964	hsa-miR-34a-5p	CORIN
LINC00964	hsa-miR-34a-5p	SNCA
LINC00964	hsa-miR-34a-5p	TIFA
LINC00964	hsa-miR-34a-5p	TRIM7
LINC00964	hsa-miR-34a-5p	SH3KBP1
LINC00964	hsa-miR-34a-5p	ASTN2
LINC00964	hsa-miR-34a-5p	FEZ1
LINC00964	hsa-miR-34a-5p	CABLES2
LINC00964	hsa-miR-34a-5p	FAM124A
LINC00964	hsa-miR-34a-5p	TMEM178A
LINC00964	hsa-miR-34a-5p	PTDSS1
LINC00964	hsa-miR-34a-5p	FAM81A
LINC00964	hsa-miR-34a-5p	PLCD3
LINC00964	hsa-miR-34a-5p	SLC16A14
LINC00964	hsa-miR-34a-5p	SGPP2
LINC00964	hsa-miR-34a-5p	DNALI1
LINC00964	hsa-miR-34a-5p	COG5
LINC00964	hsa-miR-34a-5p	ADCY1
LINC00964	hsa-miR-34a-5p	ACSF2
LINC00964	hsa-miR-34a-5p	STXBP6
LINC00964	hsa-miR-34a-5p	ROR2
LINC00964	hsa-miR-34a-5p	MN1
LINC00964	hsa-miR-34a-5p	REPS2
LINC00964	hsa-miR-34a-5p	SLN
LINC00964	hsa-miR-34a-5p	MTSS1
LINC00964	hsa-miR-34a-5p	ATP6V0E2
LINC00964	hsa-miR-34a-5p	SOSTDC1
LINC00964	hsa-miR-34a-5p	KCND3
LINC00964	hsa-miR-34a-5p	CADM2
LINC00964	hsa-miR-34a-5p	LPCAT4
LINC00964	hsa-miR-34a-5p	GEMIN4
LINC00964	hsa-miR-34a-5p	FAM216B
LINC00964	hsa-miR-34a-5p	NRXN1
LINC00964	hsa-miR-34a-5p	RNF182
LINC00964	hsa-miR-34a-5p	H2AW
LINC00964	hsa-miR-34a-5p	EFHC2
LINC00964	hsa-miR-34a-5p	KLHL32
LINC00964	hsa-miR-34a-5p	PRELID2
LINC00964	hsa-miR-34a-5p	DNER
LINC00964	hsa-miR-34a-5p	SMTNL2
LINC00964	hsa-miR-34a-5p	S100A14
LINC00964	hsa-miR-34a-5p	ZNF33B
LINC00964	hsa-miR-34a-5p	BLM
LINC00964	hsa-miR-34a-5p	ZNF273
LINC00964	hsa-miR-34a-5p	DOK6
LINC00964	hsa-miR-34a-5p	SMIM1
LINC00964	hsa-miR-34a-5p	C1orf226
LINC01018	hsa-miR-425-5p	ADAM22
LINC01018	hsa-miR-218-5p	ADAM22
LINC01018	hsa-miR-425-5p	CYB561
LINC01018	hsa-miR-493-3p	CYB561
LINC01018	hsa-miR-425-5p	HLF
LINC01018	hsa-miR-218-5p	HLF
LINC01018	hsa-miR-373-3p	ITGB6
LINC01018	hsa-miR-373-3p	NT5C1A
LINC01018	hsa-miR-373-3p	OIT3
LINC01018	hsa-miR-373-3p	SUSD4
LINC01018	hsa-miR-218-5p	SUSD4
LINC01018	hsa-miR-373-3p	GSDMC
LINC01018	hsa-miR-361-5p	PCDH15
LINC01018	hsa-miR-373-3p	PCDH15
LINC01018	hsa-miR-149-5p	ELAVL4
LINC01018	hsa-miR-425-5p	ELAVL4
LINC01018	hsa-miR-425-5p	ADCY1
LINC01018	hsa-miR-149-5p	ADCY1
LINC01018	hsa-miR-149-5p	CACNB2
LINC01018	hsa-miR-361-5p	CACNB2
LINC01018	hsa-miR-373-3p	ART5
LINC01018	hsa-miR-425-5p	CADM2
LINC01018	hsa-miR-361-5p	CADM2
LINC01018	hsa-miR-218-5p	CADM2
LINC01018	hsa-miR-373-3p	SMTNL2
LINC01018	hsa-miR-361-5p	GREB1
LINC01018	hsa-miR-149-5p	GREB1
LINC01018	hsa-miR-595	PEG10
LINC01018	hsa-miR-218-5p	PEG10
LINC01018	hsa-miR-516b-5p	PEG10
LINC01018	hsa-miR-425-5p	PEG10
LINC01018	hsa-miR-361-5p	PEG10
CRYZL2P-SEC16B	hsa-miR-126-5p	CHL1
CRYZL2P-SEC16B	hsa-miR-497-3p	CHL1
CRYZL2P-SEC16B	hsa-miR-338-3p	CHL1
CRYZL2P-SEC16B	hsa-miR-125a-5p	DGKB
CRYZL2P-SEC16B	hsa-miR-125b-5p	DGKB
CRYZL2P-SEC16B	hsa-miR-125a-5p	LMTK3
CRYZL2P-SEC16B	hsa-miR-125b-5p	LMTK3
CRYZL2P-SEC16B	hsa-miR-22-3p	LMTK3
CRYZL2P-SEC16B	hsa-miR-382-5p	PTPRD
CRYZL2P-SEC16B	hsa-miR-125b-5p	PTPRD
CRYZL2P-SEC16B	hsa-miR-126-5p	PTPRD
CRYZL2P-SEC16B	hsa-miR-125a-5p	PTPRD
CRYZL2P-SEC16B	hsa-miR-361-5p	STEAP2
CRYZL2P-SEC16B	hsa-miR-3605-3p	STEAP2
CRYZL2P-SEC16B	hsa-miR-382-5p	STEAP2
CRYZL2P-SEC16B	hsa-miR-126-5p	STEAP2
CRYZL2P-SEC16B	hsa-miR-22-3p	STEAP2
CRYZL2P-SEC16B	hsa-miR-125b-5p	KCNJ3
CRYZL2P-SEC16B	hsa-miR-361-5p	KCNJ3
CRYZL2P-SEC16B	hsa-miR-125a-5p	KCNJ3
CRYZL2P-SEC16B	hsa-miR-338-3p	HCN1
CRYZL2P-SEC16B	hsa-miR-22-3p	HCN1
CRYZL2P-SEC16B	hsa-miR-361-5p	CACNB2
CRYZL2P-SEC16B	hsa-miR-125a-5p	CACNB2
CRYZL2P-SEC16B	hsa-miR-125b-5p	CACNB2
CRYZL2P-SEC16B	hsa-miR-125b-5p	PLA2G4F
CRYZL2P-SEC16B	hsa-miR-125a-5p	PLA2G4F
CRYZL2P-SEC16B	hsa-miR-126-5p	NRXN1
CRYZL2P-SEC16B	hsa-miR-377-5p	NRXN1
CRYZL2P-SEC16B	hsa-miR-338-3p	NRXN1
CRYZL2P-SEC16B	hsa-miR-361-5p	NRXN1
CRYZL2P-SEC16B	hsa-miR-361-5p	GREB1
CRYZL2P-SEC16B	hsa-miR-766-3p	GREB1
CRYZL2P-SEC16B	hsa-miR-22-3p	GREB1
CRYZL2P-SEC16B	hsa-miR-766-3p	KBTBD13
AF131216.3	hsa-miR-34a-5p	ITGA2B
AF131216.3	hsa-miR-34a-5p	ASB4
AF131216.3	hsa-miR-34a-5p	USH1C
AF131216.3	hsa-miR-34a-5p	SYT13
AF131216.3	hsa-miR-34a-5p	CDH10
AF131216.3	hsa-miR-34a-5p	SYNE2
AF131216.3	hsa-miR-320a	SYNE2
AF131216.3	hsa-miR-22-3p	SYNE2
AF131216.3	hsa-miR-34a-5p	IL17RB
AF131216.3	hsa-miR-34a-5p	PTPRU
AF131216.3	hsa-miR-22-3p	PTPRU
AF131216.3	hsa-miR-34a-5p	NTHL1
AF131216.3	hsa-miR-22-3p	FGFR2
AF131216.3	hsa-miR-34a-5p	FGFR2
AF131216.3	hsa-miR-320a	ISOC1
AF131216.3	hsa-miR-34a-5p	ISOC1
AF131216.3	hsa-miR-320a	CAMK2A
AF131216.3	hsa-miR-22-3p	PANX2
AF131216.3	hsa-miR-22-3p	WSCD2
AF131216.3	hsa-miR-34a-5p	RAP1GAP
AF131216.3	hsa-miR-34a-5p	AKR1B1
AF131216.3	hsa-miR-34a-5p	FERMT1
AF131216.3	hsa-miR-34a-5p	CNTNAP3
AF131216.3	hsa-miR-34a-5p	PIP5K1B
AF131216.3	hsa-miR-34a-5p	ELMOD1
AF131216.3	hsa-miR-22-3p	SLC30A3
AF131216.3	hsa-miR-34a-5p	SLC30A3
AF131216.3	hsa-miR-22-3p	IGFBP5
AF131216.3	hsa-miR-34a-5p	IGFBP5
AF131216.3	hsa-miR-34a-5p	RALGPS2
AF131216.3	hsa-miR-320a	RALGPS2
AF131216.3	hsa-miR-22-3p	RALGPS2
AF131216.3	hsa-miR-34a-5p	TRIM6
AF131216.3	hsa-miR-22-3p	POF1B
AF131216.3	hsa-miR-34a-5p	EREG
AF131216.3	hsa-miR-34a-5p	C1QL1
AF131216.3	hsa-miR-34a-5p	DMGDH
AF131216.3	hsa-miR-22-3p	CCNJL
AF131216.3	hsa-miR-34a-5p	CCNJL
AF131216.3	hsa-miR-22-3p	ARHGEF4
AF131216.3	hsa-miR-34a-5p	CIB2
AF131216.3	hsa-miR-22-3p	SORD
AF131216.3	hsa-miR-34a-5p	FGF7
AF131216.3	hsa-miR-22-3p	LMTK3
AF131216.3	hsa-miR-34a-5p	SELENBP1
AF131216.3	hsa-miR-34a-5p	CORIN
AF131216.3	hsa-miR-34a-5p	TRIM7
AF131216.3	hsa-miR-34a-5p	SH3KBP1
AF131216.3	hsa-miR-34a-5p	ASTN2
AF131216.3	hsa-miR-34a-5p	FEZ1
AF131216.3	hsa-miR-34a-5p	CABLES2
AF131216.3	hsa-miR-320a	CABLES2
AF131216.3	hsa-miR-34a-5p	FAM124A
AF131216.3	hsa-miR-34a-5p	TMEM178A
AF131216.3	hsa-miR-22-3p	PTDSS1
AF131216.3	hsa-miR-34a-5p	PTDSS1
AF131216.3	hsa-miR-320a	STEAP2
AF131216.3	hsa-miR-22-3p	STEAP2
AF131216.3	hsa-miR-34a-5p	SLC16A14
AF131216.3	hsa-miR-22-3p	SLC16A14
AF131216.3	hsa-miR-22-3p	SLC15A2
AF131216.3	hsa-miR-34a-5p	DNALI1
AF131216.3	hsa-miR-22-3p	HCN1
AF131216.3	hsa-miR-34a-5p	STXBP6
AF131216.3	hsa-miR-34a-5p	ROR2
AF131216.3	hsa-miR-34a-5p	SLN
AF131216.3	hsa-miR-34a-5p	MTSS1
AF131216.3	hsa-miR-34a-5p	SOSTDC1
AF131216.3	hsa-miR-34a-5p	KCND3
AF131216.3	hsa-miR-320a	CADM2
AF131216.3	hsa-miR-34a-5p	CADM2
AF131216.3	hsa-miR-34a-5p	LPCAT4
AF131216.3	hsa-miR-22-3p	GEMIN4
AF131216.3	hsa-miR-34a-5p	GEMIN4
AF131216.3	hsa-miR-34a-5p	FAM216B
AF131216.3	hsa-miR-34a-5p	EFHC2
AF131216.3	hsa-miR-34a-5p	KLHL32
AF131216.3	hsa-miR-320a	GABRA5
AF131216.3	hsa-miR-34a-5p	PRELID2
AF131216.3	hsa-miR-320a	COL4A5
AF131216.3	hsa-miR-22-3p	COL4A5
AF131216.3	hsa-miR-34a-5p	SMTNL2
AF131216.3	hsa-miR-34a-5p	S100A14
AF131216.3	hsa-miR-320a	GREB1
AF131216.3	hsa-miR-22-3p	GREB1
AF131216.3	hsa-miR-34a-5p	BLM
AF131216.3	hsa-miR-320a	BLM
AF131216.3	hsa-miR-22-3p	FOXO6
AF131216.3	hsa-miR-34a-5p	SMIM1
AF131216.3	hsa-miR-320a	PEG10
AF131216.3	hsa-miR-34a-5p	PEG10
AF131216.3	hsa-miR-22-3p	PEG10
AC010186.3	hsa-miR-660-5p	RNF43
AC107398.3	hsa-let-7b-5p	USH1C
AC107398.3	hsa-miR-34a-5p	USH1C
AC107398.3	hsa-miR-103a-3p	HFE
AC107398.3	hsa-miR-107	HFE
AC107398.3	hsa-miR-16-5p	HFE
AC107398.3	hsa-miR-29b-3p	CHDH
AC107398.3	hsa-miR-124-3p	CHDH
AC107398.3	hsa-miR-29a-3p	CHDH
AC107398.3	hsa-miR-29c-3p	CHDH
AC107398.3	hsa-miR-34a-5p	IL17RB
AC107398.3	hsa-miR-16-5p	IL17RB
AC107398.3	hsa-miR-124-3p	IL17RB
AC107398.3	hsa-miR-1-3p	NTHL1
AC107398.3	hsa-miR-124-3p	NTHL1
AC107398.3	hsa-miR-34a-5p	NTHL1
AC107398.3	hsa-miR-16-5p	NTHL1
AC107398.3	hsa-miR-103a-3p	FGFR2
AC107398.3	hsa-miR-107	FGFR2
AC107398.3	hsa-miR-1-3p	FGFR2
AC107398.3	hsa-miR-34a-5p	FGFR2
AC107398.3	hsa-miR-19a-3p	FGFR2
AC107398.3	hsa-miR-19b-3p	FGFR2
AC107398.3	hsa-miR-29a-3p	CLEC2D
AC107398.3	hsa-miR-34a-5p	CLEC2D
AC107398.3	hsa-miR-29c-3p	CLEC2D
AC107398.3	hsa-miR-29b-3p	CLEC2D
AC107398.3	hsa-miR-16-5p	PANX2
AC107398.3	hsa-let-7b-5p	PANX2
AC107398.3	hsa-miR-124-3p	SEMA3A
AC107398.3	hsa-miR-16-5p	SEMA3A
AC107398.3	hsa-miR-1-3p	SEMA3A
AC107398.3	hsa-miR-15b-5p	SEMA3A
AC107398.3	hsa-miR-30b-5p	SEMA3A
AC107398.3	hsa-miR-30c-5p	SEMA3A
AC107398.3	hsa-miR-15a-5p	SEMA3A
AC107398.3	hsa-miR-103a-3p	RAP1GAP
AC107398.3	hsa-miR-107	RAP1GAP
AC107398.3	hsa-miR-195-5p	RAP1GAP
AC107398.3	hsa-miR-34a-5p	RAP1GAP
AC107398.3	hsa-let-7b-5p	RBFOX1
AC107398.3	hsa-miR-369-3p	RBFOX1
AC107398.3	hsa-miR-9-3p	RBFOX1
AC107398.3	hsa-miR-30c-5p	RBFOX1
AC107398.3	hsa-miR-30b-5p	RBFOX1
AC107398.3	hsa-miR-1-3p	CD82
AC107398.3	hsa-miR-103a-3p	CD82
AC107398.3	hsa-miR-107	CD82
AC107398.3	hsa-miR-34a-5p	AKR1B1
AC107398.3	hsa-miR-29a-3p	AKR1B1
AC107398.3	hsa-miR-124-3p	AKR1B1
AC107398.3	hsa-miR-107	EPB41L4B
AC107398.3	hsa-miR-16-5p	EPB41L4B
AC107398.3	hsa-miR-1-3p	EPB41L4B
AC107398.3	hsa-miR-103a-3p	EPB41L4B
AC107398.3	hsa-let-7b-5p	DERL3
AC107398.3	hsa-miR-16-5p	DERL3
AC107398.3	hsa-miR-124-3p	FOXRED2
AC107398.3	hsa-miR-1-3p	FOXRED2
AC107398.3	hsa-miR-107	FOXRED2
AC107398.3	hsa-miR-195-5p	FOXRED2
AC107398.3	hsa-miR-34a-5p	FOXRED2
AC107398.3	hsa-miR-124-3p	CHADL
AC107398.3	hsa-miR-29c-3p	CHADL
AC107398.3	hsa-miR-34a-5p	BMP7
AC107398.3	hsa-miR-137	BMP7
AC107398.3	hsa-let-7b-5p	BMP7
AC107398.3	hsa-miR-1-3p	BMP7
AC107398.3	hsa-miR-19b-3p	NALCN
AC107398.3	hsa-miR-126-5p	NALCN
AC107398.3	hsa-miR-19a-3p	NALCN
AC107398.3	hsa-let-7b-5p	FAM189A1
AC107398.3	hsa-let-7a-5p	FAM189A1
AC107398.3	hsa-let-7b-5p	HPN
AC107398.3	hsa-let-7d-5p	HPN
AC107398.3	hsa-miR-23b-3p	RUNDC3B
AC107398.3	hsa-miR-1-3p	RUNDC3B
AC107398.3	hsa-miR-485-5p	RUNDC3B
AC107398.3	hsa-miR-124-3p	RUNDC3B
AC107398.3	hsa-miR-16-5p	CNTNAP3
AC107398.3	hsa-miR-34a-5p	CNTNAP3
AC107398.3	hsa-miR-1-3p	CNTNAP3
AC107398.3	hsa-miR-107	PIP5K1B
AC107398.3	hsa-miR-34a-5p	PIP5K1B
AC107398.3	hsa-miR-9-5p	PIP5K1B
AC107398.3	hsa-miR-124-3p	PIP5K1B
AC107398.3	hsa-miR-34a-5p	ELMOD1
AC107398.3	hsa-miR-124-3p	ELMOD1
AC107398.3	hsa-miR-369-3p	ELMOD1
AC107398.3	hsa-miR-9-5p	PHACTR1
AC107398.3	hsa-miR-19b-3p	PHACTR1
AC107398.3	hsa-miR-19a-3p	PHACTR1
AC107398.3	hsa-miR-16-5p	PRPH2
AC107398.3	hsa-miR-23b-3p	PRPH2
AC107398.3	hsa-let-7b-5p	RBP1
AC107398.3	hsa-miR-124-3p	RBP1
AC107398.3	hsa-miR-1-3p	RBP1
AC107398.3	hsa-miR-16-5p	GRB14
AC107398.3	hsa-miR-124-3p	GRB14
AC107398.3	hsa-miR-1-3p	GRB14
AC107398.3	hsa-miR-195-5p	IGFBP5
AC107398.3	hsa-miR-23b-3p	IGFBP5
AC107398.3	hsa-miR-34a-5p	IGFBP5
AC107398.3	hsa-miR-185-5p	IGFBP5
AC107398.3	hsa-miR-15b-5p	IGFBP5
AC107398.3	hsa-miR-16-5p	IGFBP5
AC107398.3	hsa-miR-1-3p	IGFBP5
AC107398.3	hsa-miR-103a-3p	IGFBP5
AC107398.3	hsa-miR-107	IGFBP5
AC107398.3	hsa-miR-15a-5p	IGFBP5
AC107398.3	hsa-miR-143-3p	IGFBP5
AC107398.3	hsa-miR-34a-5p	RALGPS2
AC107398.3	hsa-miR-1-3p	RALGPS2
AC107398.3	hsa-miR-124-3p	RALGPS2
AC107398.3	hsa-miR-107	RALGPS2
AC107398.3	hsa-miR-103a-3p	RALGPS2
AC107398.3	hsa-miR-320a	RALGPS2
AC107398.3	hsa-miR-30c-5p	RALGPS2
AC107398.3	hsa-miR-30b-5p	RALGPS2
AC107398.3	hsa-miR-29b-3p	PRDX1
AC107398.3	hsa-miR-29a-3p	PRDX1
AC107398.3	hsa-miR-484	PRDX1
AC107398.3	hsa-miR-23b-3p	PRDX1
AC107398.3	hsa-miR-29c-3p	PRDX1
AC107398.3	hsa-miR-34a-5p	PRDX1
AC107398.3	hsa-miR-34a-5p	TRIM6
AC107398.3	hsa-miR-16-5p	TRIM6
AC107398.3	hsa-miR-1-3p	TRIM6
AC107398.3	hsa-let-7b-5p	TRIM6
AC107398.3	hsa-miR-124-3p	TRIM6
AC107398.3	hsa-miR-103a-3p	PDZRN3
AC107398.3	hsa-miR-107	PDZRN3
AC107398.3	hsa-miR-497-5p	POF1B
AC107398.3	hsa-miR-195-5p	POF1B
AC107398.3	hsa-miR-16-5p	EREG
AC107398.3	hsa-miR-1-3p	EREG
AC107398.3	hsa-miR-124-3p	EREG
AC107398.3	hsa-let-7b-5p	EREG
AC107398.3	hsa-miR-34a-5p	EREG
AC107398.3	hsa-miR-124-3p	GRIA3
AC107398.3	hsa-miR-1-3p	GRIA3
AC107398.3	hsa-miR-137	GRIA3
AC107398.3	hsa-miR-23b-3p	FAM78A
AC107398.3	hsa-miR-126-5p	FAM78A
AC107398.3	hsa-miR-124-3p	FAM78A
AC107398.3	hsa-miR-29a-3p	FAM78A
AC107398.3	hsa-miR-1-3p	FAM78A
AC107398.3	hsa-miR-23a-3p	FAM78A
AC107398.3	hsa-miR-29b-3p	HIVEP3
AC107398.3	hsa-miR-29a-3p	HIVEP3
AC107398.3	hsa-miR-29c-3p	HIVEP3
AC107398.3	hsa-miR-1-3p	C1QL1
AC107398.3	hsa-let-7b-5p	C1QL1
AC107398.3	hsa-miR-34a-5p	C1QL1
AC107398.3	hsa-miR-103a-3p	RAB11FIP4
AC107398.3	hsa-miR-574-5p	RAB11FIP4
AC107398.3	hsa-let-7d-5p	RAB11FIP4
AC107398.3	hsa-miR-107	RAB11FIP4
AC107398.3	hsa-miR-19b-3p	AC002316.1
AC107398.3	hsa-let-7b-5p	AC002316.1
AC107398.3	hsa-miR-124-3p	AC002316.1
AC107398.3	hsa-miR-19a-3p	AC002316.1
AC107398.3	hsa-miR-382-5p	AC002316.1
AC107398.3	hsa-miR-34a-5p	DMGDH
AC107398.3	hsa-miR-124-3p	DMGDH
AC107398.3	hsa-miR-30c-5p	TSPAN2
AC107398.3	hsa-miR-30b-5p	TSPAN2
AC107398.3	hsa-let-7b-5p	TSPAN2
AC107398.3	hsa-miR-1-3p	TSPAN2
AC107398.3	hsa-miR-124-3p	TRIM45
AC107398.3	hsa-miR-16-5p	TRIM45
AC107398.3	hsa-miR-1-3p	TRIM45
AC107398.3	hsa-miR-23b-3p	CCNJL
AC107398.3	hsa-miR-34a-5p	CCNJL
AC107398.3	hsa-miR-124-3p	CCNJL
AC107398.3	hsa-let-7a-5p	CCNJL
AC107398.3	hsa-miR-1-3p	CCNJL
AC107398.3	hsa-miR-195-5p	CIB2
AC107398.3	hsa-miR-34a-5p	CIB2
AC107398.3	hsa-miR-137	SLC40A1
AC107398.3	hsa-miR-124-3p	SLC40A1
AC107398.3	hsa-miR-34a-5p	SLC40A1
AC107398.3	hsa-miR-29a-3p	SLC40A1
AC107398.3	hsa-let-7b-5p	SLC40A1
AC107398.3	hsa-miR-124-3p	CPNE8
AC107398.3	hsa-miR-1-3p	CPNE8
AC107398.3	hsa-miR-30c-5p	CPNE8
AC107398.3	hsa-miR-16-5p	CPNE8
AC107398.3	hsa-miR-30b-5p	CPNE8
AC107398.3	hsa-miR-126-5p	CPNE8
AC107398.3	hsa-miR-16-5p	SLC44A3
AC107398.3	hsa-miR-195-5p	SLC44A3
AC107398.3	hsa-miR-124-3p	SLC44A3
AC107398.3	hsa-miR-1-3p	SELENBP1
AC107398.3	hsa-miR-124-3p	SELENBP1
AC107398.3	hsa-miR-16-5p	SELENBP1
AC107398.3	hsa-miR-34a-5p	SELENBP1
AC107398.3	hsa-miR-124-3p	TIFA
AC107398.3	hsa-miR-1-3p	TIFA
AC107398.3	hsa-miR-30b-5p	TIFA
AC107398.3	hsa-miR-34a-5p	TIFA
AC107398.3	hsa-miR-30c-5p	TIFA
AC107398.3	hsa-miR-124-3p	SH3KBP1
AC107398.3	hsa-miR-16-5p	SH3KBP1
AC107398.3	hsa-miR-1-3p	SH3KBP1
AC107398.3	hsa-miR-34a-5p	SH3KBP1
AC107398.3	hsa-miR-23b-3p	ZNF711
AC107398.3	hsa-miR-23a-3p	ZNF711
AC107398.3	hsa-miR-19b-3p	ZNF711
AC107398.3	hsa-miR-30c-5p	ZNF711
AC107398.3	hsa-miR-143-3p	ZNF711
AC107398.3	hsa-miR-103a-3p	ZNF711
AC107398.3	hsa-miR-185-5p	ZNF711
AC107398.3	hsa-miR-30b-5p	ZNF711
AC107398.3	hsa-miR-124-3p	ZNF711
AC107398.3	hsa-miR-9-5p	ZNF711
AC107398.3	hsa-let-7b-5p	ZNF711
AC107398.3	hsa-miR-320a	ZNF711
AC107398.3	hsa-miR-425-5p	ZNF711
AC107398.3	hsa-miR-107	ZNF711
AC107398.3	hsa-miR-16-5p	ZNF711
AC107398.3	hsa-miR-19a-3p	ZNF711
AC107398.3	hsa-miR-124-3p	ASTN2
AC107398.3	hsa-miR-34a-5p	ASTN2
AC107398.3	hsa-miR-103a-3p	PCDH15
AC107398.3	hsa-miR-195-5p	PCDH15
AC107398.3	hsa-miR-107	PCDH15
AC107398.3	hsa-miR-30c-5p	FAM124A
AC107398.3	hsa-miR-34a-5p	FAM124A
AC107398.3	hsa-miR-30b-5p	FAM124A
AC107398.3	hsa-let-7b-5p	BEND6
AC107398.3	hsa-miR-137	BEND6
AC107398.3	hsa-miR-23a-3p	BEND6
AC107398.3	hsa-miR-23b-3p	BEND6
AC107398.3	hsa-miR-16-5p	BEND6
AC107398.3	hsa-miR-34a-5p	TMEM178A
AC107398.3	hsa-miR-124-3p	TMEM178A
AC107398.3	hsa-miR-369-3p	TMEM178A
AC107398.3	hsa-miR-1-3p	GRID2
AC107398.3	hsa-miR-195-5p	GRID2
AC107398.3	hsa-miR-103a-3p	GRID2
AC107398.3	hsa-miR-107	GRID2
AC107398.3	hsa-let-7f-5p	BCL2L11
AC107398.3	hsa-miR-195-5p	BCL2L11
AC107398.3	hsa-miR-16-5p	BCL2L11
AC107398.3	hsa-miR-15a-5p	BCL2L11
AC107398.3	hsa-miR-497-5p	BCL2L11
AC107398.3	hsa-let-7a-5p	BCL2L11
AC107398.3	hsa-let-7g-5p	BCL2L11
AC107398.3	hsa-miR-19b-3p	BCL2L11
AC107398.3	hsa-miR-124-3p	BCL2L11
AC107398.3	hsa-let-7i-5p	BCL2L11
AC107398.3	hsa-miR-19a-3p	BCL2L11
AC107398.3	hsa-miR-574-5p	BCL2L11
AC107398.3	hsa-let-7b-5p	BCL2L11
AC107398.3	hsa-miR-320a	BCL2L11
AC107398.3	hsa-miR-185-5p	BCL2L11
AC107398.3	hsa-miR-124-3p	RAB39B
AC107398.3	hsa-miR-1-3p	RAB39B
AC107398.3	hsa-miR-23b-3p	RAB39B
AC107398.3	hsa-miR-9-3p	RAB39B
AC107398.3	hsa-miR-23a-3p	RAB39B
AC107398.3	hsa-miR-23b-3p	PTDSS1
AC107398.3	hsa-miR-34a-5p	PTDSS1
AC107398.3	hsa-miR-124-3p	PTDSS1
AC107398.3	hsa-miR-16-5p	PTDSS1
AC107398.3	hsa-miR-23a-3p	PTDSS1
AC107398.3	hsa-miR-1-3p	PTDSS1
AC107398.3	hsa-miR-15a-5p	CACNA2D3
AC107398.3	hsa-miR-15b-5p	CACNA2D3
AC107398.3	hsa-miR-16-5p	CACNA2D3
AC107398.3	hsa-let-7b-5p	CACNA2D3
AC107398.3	hsa-miR-23b-3p	GPSM1
AC107398.3	hsa-miR-23a-3p	GPSM1
AC107398.3	hsa-miR-497-5p	GPSM1
AC107398.3	hsa-miR-9-5p	GPSM1
AC107398.3	hsa-miR-103a-3p	GPSM1
AC107398.3	hsa-miR-34a-5p	GPSM1
AC107398.3	hsa-miR-484	GPSM1
AC107398.3	hsa-miR-107	GPSM1
AC107398.3	hsa-miR-1-3p	GPSM1
AC107398.3	hsa-let-7b-5p	PLCD3
AC107398.3	hsa-miR-23b-3p	PLCD3
AC107398.3	hsa-miR-1-3p	PLCD3
AC107398.3	hsa-miR-16-5p	PLCD3
AC107398.3	hsa-miR-34a-5p	PLCD3
AC107398.3	hsa-miR-1-3p	KLHDC9
AC107398.3	hsa-miR-124-3p	KLHDC9
AC107398.3	hsa-miR-9-3p	KLHDC9
AC107398.3	hsa-miR-29c-3p	KLHDC9
AC107398.3	hsa-miR-29b-3p	KCNJ3
AC107398.3	hsa-miR-29a-3p	KCNJ3
AC107398.3	hsa-miR-369-3p	KCNJ3
AC107398.3	hsa-miR-29c-3p	KCNJ3
AC107398.3	hsa-miR-29c-3p	HTR4
AC107398.3	hsa-miR-19a-3p	COG5
AC107398.3	hsa-miR-34a-5p	COG5
AC107398.3	hsa-miR-16-5p	COG5
AC107398.3	hsa-miR-103a-3p	COG5
AC107398.3	hsa-miR-19b-3p	COG5
AC107398.3	hsa-miR-1-3p	COG5
AC107398.3	hsa-let-7b-5p	PTER
AC107398.3	hsa-miR-29c-3p	PTER
AC107398.3	hsa-miR-15a-5p	PTER
AC107398.3	hsa-miR-1-3p	PTER
AC107398.3	hsa-miR-574-5p	GABRB3
AC107398.3	hsa-miR-23a-3p	GABRB3
AC107398.3	hsa-miR-23b-3p	GABRB3
AC107398.3	hsa-miR-1-3p	GABRB3
AC107398.3	hsa-miR-369-3p	GABRB3
AC107398.3	hsa-miR-23b-3p	FAM83B
AC107398.3	hsa-miR-9-5p	FAM83B
AC107398.3	hsa-let-7b-5p	FAM83B
AC107398.3	hsa-miR-1-3p	FAM83B
AC107398.3	hsa-miR-29a-3p	FAM83B
AC107398.3	hsa-miR-9-3p	LRP1B
AC107398.3	hsa-let-7b-5p	LRP1B
AC107398.3	hsa-miR-9-5p	LRP1B
AC107398.3	hsa-miR-34a-5p	ROR2
AC107398.3	hsa-let-7f-5p	ROR2
AC107398.3	hsa-miR-34a-5p	SLN
AC107398.3	hsa-miR-124-3p	SLN
AC107398.3	hsa-miR-124-3p	LRRN2
AC107398.3	hsa-miR-1-3p	LRRN2
AC107398.3	hsa-miR-16-5p	ATP6V0E2
AC107398.3	hsa-miR-1-3p	ATP6V0E2
AC107398.3	hsa-miR-124-3p	ATP6V0E2
AC107398.3	hsa-miR-107	ATP6V0E2
AC107398.3	hsa-miR-34a-5p	ATP6V0E2
AC107398.3	hsa-miR-30c-5p	TPPP
AC107398.3	hsa-miR-484	TPPP
AC107398.3	hsa-miR-30b-5p	TPPP
AC107398.3	hsa-miR-1-3p	TPPP
AC107398.3	hsa-miR-19b-3p	LRRN3
AC107398.3	hsa-miR-19a-3p	LRRN3
AC107398.3	hsa-miR-29a-3p	LRRN3
AC107398.3	hsa-miR-23b-3p	C11orf45
AC107398.3	hsa-miR-103a-3p	C11orf45
AC107398.3	hsa-miR-107	C11orf45
AC107398.3	hsa-let-7b-5p	C11orf45
AC107398.3	hsa-miR-29a-3p	GAL3ST3
AC107398.3	hsa-miR-29c-3p	GAL3ST3
AC107398.3	hsa-miR-29b-3p	GAL3ST3
AC107398.3	hsa-miR-16-5p	LPCAT4
AC107398.3	hsa-miR-23b-3p	LPCAT4
AC107398.3	hsa-miR-1-3p	LPCAT4
AC107398.3	hsa-miR-34a-5p	LPCAT4
AC107398.3	hsa-let-7b-5p	GPC5
AC107398.3	hsa-miR-16-5p	GPC5
AC107398.3	hsa-miR-1-3p	RNF182
AC107398.3	hsa-let-7b-5p	RNF182
AC107398.3	hsa-miR-34a-5p	RNF182
AC107398.3	hsa-miR-16-5p	RNF182
AC107398.3	hsa-miR-16-5p	C1orf105
AC107398.3	hsa-miR-124-3p	C1orf105
AC107398.3	hsa-miR-1-3p	C1orf105
AC107398.3	hsa-miR-16-5p	H2AW
AC107398.3	hsa-miR-107	H2AW
AC107398.3	hsa-miR-1-3p	H2AW
AC107398.3	hsa-miR-34a-5p	H2AW
AC107398.3	hsa-miR-103a-3p	H2AW
AC107398.3	hsa-miR-15a-5p	H2AW
AC107398.3	hsa-miR-15b-5p	H2AW
AC107398.3	hsa-miR-9-5p	AATK
AC107398.3	hsa-miR-124-3p	AATK
AC107398.3	hsa-miR-15a-5p	AATK
AC107398.3	hsa-miR-107	MGAT4C
AC107398.3	hsa-miR-9-5p	MGAT4C
AC107398.3	hsa-miR-195-5p	MGAT4C
AC107398.3	hsa-miR-34a-5p	EFHC2
AC107398.3	hsa-miR-29c-3p	EFHC2
AC107398.3	hsa-miR-124-3p	MAP7D2
AC107398.3	hsa-miR-107	MAP7D2
AC107398.3	hsa-let-7b-5p	MAP7D2
AC107398.3	hsa-miR-16-5p	MAP7D2
AC107398.3	hsa-miR-1-3p	MAP7D2
AC107398.3	hsa-miR-1-3p	PRELID2
AC107398.3	hsa-miR-124-3p	PRELID2
AC107398.3	hsa-miR-34a-5p	PRELID2
AC107398.3	hsa-miR-30b-5p	JAKMIP3
AC107398.3	hsa-miR-30c-5p	JAKMIP3
AC107398.3	hsa-let-7b-5p	JAKMIP3
AC107398.3	hsa-miR-16-5p	JAKMIP3
AC107398.3	hsa-miR-23a-3p	ZNF273
AC107398.3	hsa-miR-23b-3p	ZNF273
AC107398.3	hsa-miR-124-3p	ZNF273
AC107398.3	hsa-miR-34a-5p	ZNF273
AC107398.3	hsa-let-7g-5p	TMEM229B
AC107398.3	hsa-let-7f-5p	TMEM229B
AC107398.3	hsa-let-7i-5p	TMEM229B
AC107398.3	hsa-miR-1-3p	RORB
AC107398.3	hsa-miR-19b-3p	RORB
AC107398.3	hsa-miR-107	RORB
AC107398.3	hsa-miR-369-3p	RORB
AC107398.3	hsa-miR-195-5p	RORB
AC107398.3	hsa-miR-19a-3p	RORB
AC107398.3	hsa-miR-16-5p	FOXO6
AC107398.3	hsa-let-7b-5p	FOXO6
AC107398.3	hsa-let-7b-5p	TENM3
AC107398.3	hsa-miR-16-5p	TENM3
AC107398.3	hsa-let-7f-5p	TENM3
AC107398.3	hsa-let-7i-5p	TENM3
AC107398.3	hsa-let-7g-5p	TENM3
AC107398.3	hsa-miR-124-3p	SMIM1
AC107398.3	hsa-miR-34a-5p	SMIM1
AL049555.1	hsa-miR-182-5p	USH1C
AL049555.1	hsa-miR-24-3p	CYB561
AL049555.1	hsa-miR-182-5p	CYB561
AL049555.1	hsa-miR-182-5p	SYNE2
AL049555.1	hsa-miR-24-3p	SYNE2
AL049555.1	hsa-miR-182-5p	MCOLN3
AL049555.1	hsa-miR-182-5p	ASIC4
AL049555.1	hsa-miR-24-3p	PANX2
AL049555.1	hsa-miR-182-5p	MT3
AL049555.1	hsa-miR-19a-3p	NALCN
AL049555.1	hsa-miR-182-5p	HPN
AL049555.1	hsa-miR-24-3p	APBA1
AL049555.1	hsa-miR-24-3p	HLF
AL049555.1	hsa-miR-19a-3p	HLF
AL049555.1	hsa-miR-182-5p	PRPH2
AL049555.1	hsa-miR-24-3p	HRH2
AL049555.1	hsa-miR-182-5p	CNTN3
AL049555.1	hsa-miR-182-5p	CA14
AL049555.1	hsa-miR-19a-3p	GDA
AL049555.1	hsa-miR-182-5p	GDA
AL049555.1	hsa-miR-182-5p	TRIM6
AL049555.1	hsa-miR-19a-3p	SLITRK3
AL049555.1	hsa-miR-182-5p	TMEM74B
AL049555.1	hsa-miR-182-5p	ENOSF1
AL049555.1	hsa-miR-182-5p	RBM38
AL049555.1	hsa-miR-19a-3p	RBM38
AL049555.1	hsa-miR-19a-3p	FGF7
AL049555.1	hsa-miR-182-5p	CDH13
AL049555.1	hsa-miR-24-3p	CDH13
AL049555.1	hsa-miR-182-5p	LMTK3
AL049555.1	hsa-miR-182-5p	CELSR2
AL049555.1	hsa-miR-24-3p	CELSR2
AL049555.1	hsa-miR-182-5p	RNF175
AL049555.1	hsa-miR-182-5p	SH3KBP1
AL049555.1	hsa-miR-24-3p	ZNF711
AL049555.1	hsa-miR-19a-3p	ZNF711
AL049555.1	hsa-miR-182-5p	ZNF711
AL049555.1	hsa-miR-182-5p	GSDMC
AL049555.1	hsa-miR-24-3p	FEZ1
AL049555.1	hsa-miR-182-5p	SLC7A11
AL049555.1	hsa-miR-19a-3p	SLC7A11
AL049555.1	hsa-miR-182-5p	BCL2L11
AL049555.1	hsa-miR-24-3p	BCL2L11
AL049555.1	hsa-miR-19a-3p	BCL2L11
AL049555.1	hsa-miR-182-5p	PTPRD
AL049555.1	hsa-miR-19a-3p	PTPRD
AL049555.1	hsa-miR-182-5p	GRIP1
AL049555.1	hsa-miR-182-5p	ASB16
AL049555.1	hsa-miR-24-3p	ELAVL4
AL049555.1	hsa-miR-182-5p	DNAJC5G
AL049555.1	hsa-miR-182-5p	LRP1B
AL049555.1	hsa-miR-182-5p	STXBP6
AL049555.1	hsa-miR-24-3p	SH3TC2
AL049555.1	hsa-miR-182-5p	SLN
AL049555.1	hsa-miR-182-5p	MTSS1
AL049555.1	hsa-miR-182-5p	PDE7B
AL049555.1	hsa-miR-19a-3p	PDE7B
AL049555.1	hsa-miR-19a-3p	LRRN3
AL049555.1	hsa-miR-182-5p	WDR49
AL049555.1	hsa-miR-182-5p	SPSB4
AL049555.1	hsa-miR-182-5p	C1orf105
AL049555.1	hsa-miR-19a-3p	NKAIN2
AL049555.1	hsa-miR-24-3p	TCEA3
AL049555.1	hsa-miR-182-5p	INSYN1
AL049555.1	hsa-miR-24-3p	TMEM178B
AL049555.1	hsa-miR-19a-3p	TMEM178B
AC091230.2	hsa-miR-195-5p	CDH10
AC091230.2	hsa-miR-16-5p	CDH10
AC091230.2	hsa-miR-15a-5p	PLEKHH1
AC091230.2	hsa-miR-16-5p	PLEKHH1
AC091230.2	hsa-miR-15b-5p	ISOC1
AC091230.2	hsa-miR-15a-5p	ISOC1
AC091230.2	hsa-miR-16-5p	ISOC1
AC091230.2	hsa-miR-16-5p	PANX2
AC091230.2	hsa-miR-497-5p	ADAM11
AC091230.2	hsa-miR-424-5p	ADAM11
AC091230.2	hsa-miR-15b-5p	SEMA3A
AC091230.2	hsa-miR-15a-5p	SEMA3A
AC091230.2	hsa-miR-16-5p	SEMA3A
AC091230.2	hsa-miR-16-5p	EPB41L4B
AC091230.2	hsa-miR-424-5p	EPB41L4B
AC091230.2	hsa-miR-16-5p	DERL3
AC091230.2	hsa-miR-16-5p	RPS6KA5
AC091230.2	hsa-miR-15a-5p	RPS6KA5
AC091230.2	hsa-miR-15b-5p	RPS6KA5
AC091230.2	hsa-miR-195-5p	RPS6KA5
AC091230.2	hsa-miR-195-5p	ALDOC
AC091230.2	hsa-miR-16-5p	ALDOC
AC091230.2	hsa-miR-16-5p	FAM149A
AC091230.2	hsa-miR-16-5p	PRPH2
AC091230.2	hsa-miR-16-5p	HRH2
AC091230.2	hsa-miR-497-5p	POF1B
AC091230.2	hsa-miR-195-5p	POF1B
AC091230.2	hsa-miR-195-5p	EGF
AC091230.2	hsa-miR-16-5p	SLC44A3
AC091230.2	hsa-miR-195-5p	SLC44A3
AC091230.2	hsa-miR-195-5p	SNCA
AC091230.2	hsa-miR-16-5p	SNCA
AC091230.2	hsa-miR-16-5p	CABLES2
AC091230.2	hsa-miR-195-5p	CABLES2
AC091230.2	hsa-miR-424-5p	BCL2L11
AC091230.2	hsa-miR-195-5p	BCL2L11
AC091230.2	hsa-miR-497-5p	BCL2L11
AC091230.2	hsa-miR-15a-5p	BCL2L11
AC091230.2	hsa-miR-16-5p	BCL2L11
AC091230.2	hsa-miR-15a-5p	TFF3
AC091230.2	hsa-miR-16-5p	ASB16
AC091230.2	hsa-miR-15b-5p	SLC16A14
AC091230.2	hsa-miR-16-5p	SLC16A14
AC091230.2	hsa-miR-15a-5p	SLC16A14
AC091230.2	hsa-miR-195-5p	SLC16A14
AC091230.2	hsa-miR-16-5p	GABRB1
AC091230.2	hsa-miR-195-5p	GABRB1
AC091230.2	hsa-miR-195-5p	ADGRV1
AC091230.2	hsa-miR-5682	ADGRV1
AC091230.2	hsa-miR-16-5p	KIAA0895
AC091230.2	hsa-miR-424-5p	KIAA0895
AC091230.2	hsa-miR-15b-5p	KIAA0895
AC091230.2	hsa-miR-195-5p	KIAA0895
AC091230.2	hsa-miR-15a-5p	MN1
AC091230.2	hsa-miR-16-5p	MN1
AC091230.2	hsa-miR-15b-5p	CADM2
AC091230.2	hsa-miR-195-5p	CADM2
AC091230.2	hsa-miR-195-5p	MGAT4C
AC091230.2	hsa-miR-16-5p	RGS6
AC091230.2	hsa-miR-195-5p	RGS6
AC091230.2	hsa-miR-497-5p	KCNQ5
AC091230.2	hsa-miR-424-5p	KCNQ5
AC091230.2	hsa-miR-195-5p	BLM
AC091230.2	hsa-miR-16-5p	BLM
AC091230.2	hsa-miR-497-5p	PEG10
AC091230.2	hsa-miR-424-5p	PEG10
AC091230.2	hsa-miR-195-5p	PEG10
AC091230.2	hsa-miR-15b-5p	PEG10
AC091230.2	hsa-miR-15a-5p	PEG10
AC091230.2	hsa-miR-16-5p	PEG10
AC091230.2	hsa-miR-424-5p	FRRS1L
AC091230.2	hsa-miR-15a-5p	FRRS1L
AC091230.2	hsa-miR-195-5p	FRRS1L
SSTR5-AS1	hsa-miR-22-3p	PANX2
SSTR5-AS1	hsa-miR-22-3p	WSCD2
SSTR5-AS1	hsa-miR-22-3p	POF1B
SSTR5-AS1	hsa-miR-361-3p	MZT2A
SSTR5-AS1	hsa-miR-22-3p	COL4A5
SSTR5-AS1	hsa-miR-625-5p	COL4A5
SSTR5-AS1	hsa-miR-361-3p	KBTBD13
AC010980.2	hsa-miR-30b-5p	CYB561
AC010980.2	hsa-miR-30c-5p	CYB561
AC010980.2	hsa-miR-30c-5p	HSF2
AC010980.2	hsa-miR-30b-5p	HSF2
AC010980.2	hsa-miR-361-5p	SYNE2
AC010980.2	hsa-miR-22-3p	SYNE2
AC010980.2	hsa-miR-361-5p	MCOLN3
AC010980.2	hsa-miR-22-3p	PANX2
AC010980.2	hsa-miR-22-3p	WSCD2
AC010980.2	hsa-miR-30b-5p	SEMA3A
AC010980.2	hsa-miR-30c-5p	SEMA3A
AC010980.2	hsa-miR-30c-5p	CTTNBP2
AC010980.2	hsa-miR-30b-5p	CTTNBP2
AC010980.2	hsa-miR-30b-5p	RBFOX1
AC010980.2	hsa-miR-30c-5p	RBFOX1
AC010980.2	hsa-miR-22-3p	TMEM38B
AC010980.2	hsa-miR-361-5p	TMEM38B
AC010980.2	hsa-miR-30c-5p	HLF
AC010980.2	hsa-miR-30b-5p	HLF
AC010980.2	hsa-miR-30c-5p	ENPP5
AC010980.2	hsa-miR-30b-5p	ENPP5
AC010980.2	hsa-miR-22-3p	RALGPS2
AC010980.2	hsa-miR-30b-5p	RALGPS2
AC010980.2	hsa-miR-30c-5p	RALGPS2
AC010980.2	hsa-miR-22-3p	POF1B
AC010980.2	hsa-miR-30b-5p	CHL1
AC010980.2	hsa-miR-30c-5p	CHL1
AC010980.2	hsa-miR-30c-5p	TSPAN2
AC010980.2	hsa-miR-30b-5p	TSPAN2
AC010980.2	hsa-miR-22-3p	ARHGEF4
AC010980.2	hsa-miR-30b-5p	SLC44A5
AC010980.2	hsa-miR-30c-5p	SLC44A5
AC010980.2	hsa-miR-30c-5p	CPNE8
AC010980.2	hsa-miR-30b-5p	CPNE8
AC010980.2	hsa-miR-22-3p	SORD
AC010980.2	hsa-miR-30b-5p	CDH13
AC010980.2	hsa-miR-30c-5p	CDH13
AC010980.2	hsa-miR-361-5p	TIFA
AC010980.2	hsa-miR-30b-5p	TIFA
AC010980.2	hsa-miR-30c-5p	TIFA
AC010980.2	hsa-miR-361-5p	PCDH15
AC010980.2	hsa-miR-30b-5p	FAM124A
AC010980.2	hsa-miR-30c-5p	FAM124A
AC010980.2	hsa-miR-361-5p	SLC7A11
AC010980.2	hsa-miR-30b-5p	SLC7A11
AC010980.2	hsa-miR-30c-5p	SLC7A11
AC010980.2	hsa-miR-22-3p	STEAP2
AC010980.2	hsa-miR-361-5p	STEAP2
AC010980.2	hsa-miR-30b-5p	FAM81A
AC010980.2	hsa-miR-30c-5p	FAM81A
AC010980.2	hsa-miR-30b-5p	GABRB1
AC010980.2	hsa-miR-30c-5p	GABRB1
AC010980.2	hsa-miR-22-3p	SLC15A2
AC010980.2	hsa-miR-22-3p	HCN1
AC010980.2	hsa-miR-361-5p	CXXC4
AC010980.2	hsa-miR-30b-5p	TPPP
AC010980.2	hsa-miR-30c-5p	TPPP
AC010980.2	hsa-miR-361-5p	CADM2
AC010980.2	hsa-miR-30c-5p	CADM2
AC010980.2	hsa-miR-30b-5p	CADM2
AC010980.2	hsa-miR-30b-5p	NRXN1
AC010980.2	hsa-miR-30c-5p	NRXN1
AC010980.2	hsa-miR-361-5p	NRXN1
AC010980.2	hsa-miR-361-5p	NTM
AC010980.2	hsa-miR-30b-5p	GABRA5
AC010980.2	hsa-miR-30c-5p	GABRA5
AC010980.2	hsa-miR-30b-5p	SBK1
AC010980.2	hsa-miR-30c-5p	SBK1
AC010980.2	hsa-miR-30b-5p	JAKMIP3
AC010980.2	hsa-miR-30c-5p	JAKMIP3
AC010980.2	hsa-miR-22-3p	GREB1
AC010980.2	hsa-miR-361-5p	GREB1
AC010980.2	hsa-miR-22-3p	FOXO6
AC010980.2	hsa-miR-361-5p	ATP6V1G2
AC010980.2	hsa-miR-30b-5p	PEG10
AC010980.2	hsa-miR-361-5p	PEG10
AC010980.2	hsa-miR-30c-5p	PEG10
AC010980.2	hsa-miR-22-3p	PEG10
AC021683.2	hsa-miR-338-3p	GALNT16
AC021683.2	hsa-miR-338-3p	ADGRB2
AC021683.2	hsa-miR-149-5p	ARHGEF4
AC021683.2	hsa-miR-149-5p	CABLES2
AC021683.2	hsa-miR-149-5p	ELAVL4
AC021683.2	hsa-miR-149-5p	C1orf115
AC021683.2	hsa-miR-149-5p	SLC15A2
AC021683.2	hsa-miR-338-3p	HCN1
AC021683.2	hsa-miR-149-5p	CACNB2
AC021683.2	hsa-miR-149-5p	NRXN1
AC021683.2	hsa-miR-338-3p	NRXN1
AC021683.2	hsa-miR-338-3p	C11orf87

## Sheet: yellow
Triple network in yellow module
lncRNA	miRNA	mRNA
LINC02397	hsa-miR-124-3p	ITGA3
LINC02397	hsa-miR-34a-5p	ITGA3
LINC02397	hsa-miR-155-5p	ITGA3
LINC02397	hsa-miR-34a-5p	ETV1
LINC02397	hsa-miR-155-5p	ETV1
LINC02397	hsa-miR-34a-5p	RNF216
LINC02397	hsa-miR-618	RNF216
LINC02397	hsa-miR-34a-5p	ARNTL2
LINC02397	hsa-miR-155-5p	ARNTL2
LINC02397	hsa-miR-155-5p	RPS6KA2
LINC02397	hsa-miR-124-3p	RPS6KA2
LINC02397	hsa-miR-124-3p	MYH7B
LINC02397	hsa-miR-124-3p	OXCT1
LINC02397	hsa-miR-155-5p	OXCT1
LINC02397	hsa-miR-365a-3p	RAPGEF4
LINC02397	hsa-miR-365b-3p	RAPGEF4
LINC02397	hsa-miR-155-5p	MYH7
LINC02397	hsa-miR-34a-5p	KDELR3
LINC02397	hsa-miR-124-3p	KDELR3
LINC02397	hsa-miR-124-3p	DMC1
LINC02397	hsa-miR-124-3p	NIN
LINC02397	hsa-miR-618	NIN
LINC02397	hsa-miR-155-5p	NIN
LINC02397	hsa-miR-124-3p	SLC8A3
LINC02397	hsa-miR-124-3p	BIRC7
LINC02397	hsa-miR-155-5p	SMAD7
LINC02397	hsa-miR-124-3p	SMAD7
LINC02397	hsa-miR-34a-5p	SMAD7
LINC02397	hsa-miR-124-3p	CRYM
LINC02397	hsa-miR-155-5p	PRKAR1A
LINC02397	hsa-miR-124-3p	PRKAR1A
LINC02397	hsa-miR-34a-5p	PRKAR1A
LINC02397	hsa-miR-34a-5p	P3H3
LINC02397	hsa-miR-155-5p	P3H3
LINC02397	hsa-miR-124-3p	SH2B3
LINC02397	hsa-miR-155-5p	SH2B3
LINC02397	hsa-miR-34a-5p	SH2B3
LINC02397	hsa-miR-155-5p	ENO2
LINC02397	hsa-miR-34a-5p	ENO2
LINC02397	hsa-miR-124-3p	ENO2
LINC02397	hsa-miR-618	BACH2
LINC02397	hsa-miR-155-5p	BACH2
LINC02397	hsa-miR-124-3p	DAP
LINC02397	hsa-miR-34a-5p	DAP
LINC02397	hsa-miR-124-3p	IGFBP2
LINC02397	hsa-miR-34a-5p	IGFBP2
LINC02397	hsa-miR-124-3p	FHL2
LINC02397	hsa-miR-34a-5p	FHL2
LINC02397	hsa-miR-124-3p	SLC1A4
LINC02397	hsa-miR-155-5p	SLC1A4
LINC02397	hsa-miR-34a-5p	SLC1A4
LINC02397	hsa-miR-124-3p	SPR
LINC02397	hsa-miR-155-5p	EPHA4
LINC02397	hsa-miR-34a-5p	EPHA4
LINC02397	hsa-miR-365a-3p	EPHA4
LINC02397	hsa-miR-365b-3p	EPHA4
LINC02397	hsa-miR-155-5p	PAPPA2
LINC02397	hsa-miR-34a-5p	KCNC4
LINC02397	hsa-miR-124-3p	KCNC4
LINC02397	hsa-miR-155-5p	KCNC4
LINC02397	hsa-miR-155-5p	NPPB
LINC02397	hsa-miR-124-3p	NPPB
LINC02397	hsa-miR-124-3p	HSPA2
LINC02397	hsa-miR-155-5p	HSPA2
LINC02397	hsa-miR-34a-5p	HSPA2
LINC02397	hsa-miR-124-3p	TNNI3
LINC02397	hsa-miR-34a-5p	TNNI3
LINC02397	hsa-miR-155-5p	NES
LINC02397	hsa-miR-124-3p	NES
LINC02397	hsa-miR-34a-5p	MYO18B
LINC02397	hsa-miR-155-5p	GALNT5
LINC02397	hsa-miR-124-3p	GALNT5
LINC02397	hsa-miR-155-5p	CGREF1
LINC02397	hsa-miR-124-3p	MYPN
LINC02397	hsa-miR-155-5p	MYPN
LINC02397	hsa-miR-124-3p	CHRNA1
LINC02397	hsa-miR-365a-3p	B4GALNT3
LINC02397	hsa-miR-618	B4GALNT3
LINC02397	hsa-miR-365b-3p	B4GALNT3
LINC02397	hsa-miR-155-5p	PHLDA1
LINC02397	hsa-miR-34a-5p	PHLDA1
LINC02397	hsa-miR-124-3p	PHLDA1
LINC02397	hsa-miR-155-5p	SDSL
LINC02397	hsa-miR-34a-5p	SDSL
LINC02397	hsa-miR-124-3p	ARMH4
LINC02397	hsa-miR-124-3p	TGFB1I1
LINC02397	hsa-miR-34a-5p	TGFB1I1
LINC02397	hsa-miR-155-5p	RPL3L
LINC02397	hsa-miR-155-5p	SLC47A1
LINC02397	hsa-miR-124-3p	SLC47A1
LINC02397	hsa-miR-365a-3p	EPHA2
LINC02397	hsa-miR-34a-5p	EPHA2
LINC02397	hsa-miR-124-3p	EPHA2
LINC02397	hsa-miR-365a-3p	ROPN1L
LINC02397	hsa-miR-34a-5p	DPYSL4
LINC02397	hsa-miR-124-3p	DPYSL4
LINC02397	hsa-miR-155-5p	ADPRHL1
LINC02397	hsa-miR-124-3p	GRIA1
LINC02397	hsa-miR-124-3p	RCAN1
LINC02397	hsa-miR-155-5p	RCAN1
LINC02397	hsa-miR-34a-5p	RCAN1
LINC02397	hsa-miR-124-3p	LRRC2
LINC02397	hsa-miR-124-3p	PDP1
LINC02397	hsa-miR-155-5p	PDP1
LINC02397	hsa-miR-365b-3p	PDP1
LINC02397	hsa-miR-365a-3p	PDP1
LINC02397	hsa-miR-124-3p	PACSIN3
LINC02397	hsa-miR-155-5p	PACSIN3
LINC02397	hsa-miR-155-5p	ABTB2
LINC02397	hsa-miR-34a-5p	ABTB2
LINC02397	hsa-miR-124-3p	MTCL1
LINC02397	hsa-miR-34a-5p	MTCL1
LINC02397	hsa-miR-155-5p	PLEKHA2
LINC02397	hsa-miR-124-3p	PLEKHA2
LINC02397	hsa-miR-124-3p	CTNND2
LINC02397	hsa-miR-34a-5p	CTNND2
LINC02397	hsa-miR-124-3p	FRMD5
LINC02397	hsa-miR-155-5p	FRMD5
LINC02397	hsa-miR-34a-5p	RASGRP1
LINC02397	hsa-miR-155-5p	RASGRP1
LINC02397	hsa-miR-124-3p	LCLAT1
LINC02397	hsa-miR-155-5p	LCLAT1
LINC02397	hsa-miR-34a-5p	LCLAT1
LINC02397	hsa-miR-155-5p	ADCY6
LINC02397	hsa-miR-124-3p	ADCY6
LINC02397	hsa-miR-124-3p	PHLDA3
LINC02397	hsa-miR-155-5p	PHLDA3
LINC02397	hsa-miR-34a-5p	ARHGAP1
LINC02397	hsa-miR-124-3p	ARHGAP1
LINC02397	hsa-miR-155-5p	ETV4
LINC02397	hsa-miR-124-3p	ETV4
LINC02397	hsa-miR-155-5p	FAM133A
LINC02397	hsa-miR-124-3p	FAM133A
LINC02397	hsa-miR-124-3p	LSMEM2
LINC02397	hsa-miR-155-5p	C6orf223
LINC02397	hsa-miR-124-3p	EXT1
LINC02397	hsa-miR-34a-5p	EXT1
LINC02397	hsa-miR-124-3p	KCNA4
LINC02397	hsa-miR-124-3p	NXPH4
LINC02397	hsa-miR-34a-5p	NXPH4
LINC02397	hsa-miR-155-5p	PLCB1
LINC02397	hsa-miR-124-3p	PLCB1
LINC02397	hsa-miR-34a-5p	PYCR1
LINC02397	hsa-miR-155-5p	PYCR1
LINC02397	hsa-miR-124-3p	PYCR1
LINC02397	hsa-miR-155-5p	BEGAIN
LINC02397	hsa-miR-34a-5p	BEGAIN
LINC02397	hsa-miR-124-3p	LIN9
LINC02397	hsa-miR-155-5p	LIN9
LINC02397	hsa-miR-34a-5p	LIN9
LINC02397	hsa-miR-124-3p	ROR1
LINC02397	hsa-miR-155-5p	ROR1
LINC02397	hsa-miR-34a-5p	ROR1
LINC02397	hsa-miR-124-3p	ADAMTSL5
LINC02397	hsa-miR-155-5p	PCYT2
LINC02397	hsa-miR-155-5p	LAMB3
LINC02397	hsa-miR-124-3p	LAMB3
LINC02397	hsa-miR-34a-5p	LAMB3
LINC02397	hsa-miR-124-3p	PDGFA
LINC02397	hsa-miR-34a-5p	PDGFA
LINC02397	hsa-miR-34a-5p	COL13A1
LINC02397	hsa-miR-155-5p	MAFK
LINC02397	hsa-miR-124-3p	MAFK
LINC02397	hsa-miR-618	SCAMP5
LINC02397	hsa-miR-124-3p	SCAMP5
LINC02397	hsa-miR-124-3p	LBH
LINC02397	hsa-miR-155-5p	LBH
LINC02397	hsa-miR-155-5p	ETV5
LINC02397	hsa-miR-34a-5p	ETV5
AL158066.1	hsa-miR-19b-3p	MAP4
AL158066.1	hsa-miR-126-5p	MAP4
AL158066.1	hsa-miR-19a-3p	MAP4
AL158066.1	hsa-miR-19a-3p	SLC9A1
AL158066.1	hsa-miR-19b-3p	SLC9A1
AL158066.1	hsa-miR-19a-3p	BAMBI
AL158066.1	hsa-miR-19b-3p	BAMBI
AL158066.1	hsa-miR-19a-3p	MID1
AL158066.1	hsa-miR-19b-3p	MID1
AL158066.1	hsa-miR-19a-3p	SLC1A2
AL158066.1	hsa-miR-126-5p	SLC1A2
AL158066.1	hsa-miR-19b-3p	SLC1A2
AL158066.1	hsa-miR-19b-3p	HSPA2
AL158066.1	hsa-miR-19a-3p	HSPA2
AL158066.1	hsa-miR-19b-3p	SLC6A6
AL158066.1	hsa-miR-19a-3p	SLC6A6
AL158066.1	hsa-miR-19b-3p	ATP13A3
AL158066.1	hsa-miR-126-5p	ATP13A3
AL158066.1	hsa-miR-19a-3p	ATP13A3
AL158066.1	hsa-miR-19a-3p	TTC9
AL158066.1	hsa-miR-19b-3p	TTC9
AL158066.1	hsa-miR-19a-3p	MDFIC
AL158066.1	hsa-miR-19b-3p	MDFIC
AL158066.1	hsa-miR-19a-3p	PHLDA1
AL158066.1	hsa-miR-19b-3p	PHLDA1
AL158066.1	hsa-miR-19a-3p	SMYD2
AL158066.1	hsa-miR-19b-3p	SMYD2
AL158066.1	hsa-miR-19b-3p	MED12L
AL158066.1	hsa-miR-19a-3p	MED12L
AL158066.1	hsa-miR-126-5p	LCLAT1
AL158066.1	hsa-miR-19a-3p	LCLAT1
AL158066.1	hsa-miR-19b-3p	LCLAT1
AL158066.1	hsa-miR-19a-3p	PHLDA3
AL158066.1	hsa-miR-19b-3p	PHLDA3
AL158066.1	hsa-miR-19a-3p	PLCB1
AL158066.1	hsa-miR-126-5p	PLCB1
AL158066.1	hsa-miR-19b-3p	ABAT
AL158066.1	hsa-miR-19a-3p	ABAT
AL158066.1	hsa-miR-19b-3p	LIN9
AL158066.1	hsa-miR-19a-3p	LIN9
AL158066.1	hsa-miR-19a-3p	LINC00672
AL158066.1	hsa-miR-19b-3p	LINC00672
AC147651.1	hsa-miR-142-3p	CHGB
AC147651.1	hsa-miR-149-5p	CHGB
AC147651.1	hsa-miR-744-5p	GRIP2
SH3BP5-AS1	hsa-miR-16-5p	CYP26B1
SH3BP5-AS1	hsa-miR-15a-5p	CYP26B1
SH3BP5-AS1	hsa-miR-15b-5p	CYP26B1
SH3BP5-AS1	hsa-miR-195-5p	EHD3
SH3BP5-AS1	hsa-miR-16-5p	EHD3
SH3BP5-AS1	hsa-let-7a-5p	MAP4
SH3BP5-AS1	hsa-miR-22-3p	MAP4
SH3BP5-AS1	hsa-miR-16-5p	MAP4
SH3BP5-AS1	hsa-miR-195-5p	MAP4
SH3BP5-AS1	hsa-miR-15a-5p	MAP4
SH3BP5-AS1	hsa-miR-15b-5p	MAP4
SH3BP5-AS1	hsa-let-7e-5p	MAP4
SH3BP5-AS1	hsa-miR-15b-5p	LTBP1
SH3BP5-AS1	hsa-miR-16-5p	LTBP1
SH3BP5-AS1	hsa-miR-195-5p	LTBP1
SH3BP5-AS1	hsa-miR-15a-5p	LTBP1
SH3BP5-AS1	hsa-miR-15a-5p	PTPN3
SH3BP5-AS1	hsa-miR-16-5p	PTPN3
SH3BP5-AS1	hsa-miR-15b-5p	PTPN3
SH3BP5-AS1	hsa-miR-195-5p	PTPN3
SH3BP5-AS1	hsa-let-7b-5p	PTPN3
SH3BP5-AS1	hsa-let-7b-5p	DHRS9
SH3BP5-AS1	hsa-miR-16-5p	DHRS9
SH3BP5-AS1	hsa-miR-16-5p	CFAP61
SH3BP5-AS1	hsa-let-7a-5p	SLC9A1
SH3BP5-AS1	hsa-miR-16-5p	SLC9A1
SH3BP5-AS1	hsa-miR-15a-5p	SLC9A1
SH3BP5-AS1	hsa-miR-15b-5p	P3H2
SH3BP5-AS1	hsa-miR-15a-5p	P3H2
SH3BP5-AS1	hsa-miR-16-5p	P3H2
SH3BP5-AS1	hsa-miR-22-3p	BAMBI
SH3BP5-AS1	hsa-miR-195-5p	BAMBI
SH3BP5-AS1	hsa-miR-15b-5p	BAMBI
SH3BP5-AS1	hsa-miR-16-5p	BAMBI
SH3BP5-AS1	hsa-miR-15a-5p	BAMBI
SH3BP5-AS1	hsa-let-7i-5p	HCN2
SH3BP5-AS1	hsa-let-7a-5p	HCN2
SH3BP5-AS1	hsa-let-7b-5p	HCN2
SH3BP5-AS1	hsa-let-7e-5p	HCN2
SH3BP5-AS1	hsa-miR-195-5p	KDELR3
SH3BP5-AS1	hsa-miR-16-5p	KDELR3
SH3BP5-AS1	hsa-miR-15a-5p	NIN
SH3BP5-AS1	hsa-miR-15b-5p	NIN
SH3BP5-AS1	hsa-miR-16-5p	NIN
SH3BP5-AS1	hsa-miR-195-5p	NIN
SH3BP5-AS1	hsa-miR-195-5p	SHB
SH3BP5-AS1	hsa-miR-16-5p	SHB
SH3BP5-AS1	hsa-let-7b-5p	SHB
SH3BP5-AS1	hsa-miR-15b-5p	PRKAR1A
SH3BP5-AS1	hsa-miR-15a-5p	PRKAR1A
SH3BP5-AS1	hsa-miR-16-5p	PRKAR1A
SH3BP5-AS1	hsa-miR-22-3p	PRKAR1A
SH3BP5-AS1	hsa-miR-195-5p	PRKAR1A
SH3BP5-AS1	hsa-miR-16-5p	INPP4B
SH3BP5-AS1	hsa-let-7b-5p	INPP4B
SH3BP5-AS1	hsa-let-7b-5p	ENO2
SH3BP5-AS1	hsa-miR-16-5p	ENO2
SH3BP5-AS1	hsa-miR-195-5p	ENO2
SH3BP5-AS1	hsa-let-7e-5p	BACH2
SH3BP5-AS1	hsa-miR-195-5p	BACH2
SH3BP5-AS1	hsa-miR-16-5p	BACH2
SH3BP5-AS1	hsa-miR-16-5p	PDE8B
SH3BP5-AS1	hsa-let-7b-5p	PDE8B
SH3BP5-AS1	hsa-miR-195-5p	FGF1
SH3BP5-AS1	hsa-miR-16-5p	FGF1
SH3BP5-AS1	hsa-let-7i-5p	FHL2
SH3BP5-AS1	hsa-miR-16-5p	FHL2
SH3BP5-AS1	hsa-miR-15a-5p	FHL2
SH3BP5-AS1	hsa-miR-195-5p	FHL2
SH3BP5-AS1	hsa-let-7g-5p	FHL2
SH3BP5-AS1	hsa-miR-195-5p	PAPPA2
SH3BP5-AS1	hsa-let-7b-5p	PAPPA2
SH3BP5-AS1	hsa-let-7b-5p	LRP4
SH3BP5-AS1	hsa-miR-16-5p	LRP4
SH3BP5-AS1	hsa-miR-195-5p	CHRNA1
SH3BP5-AS1	hsa-miR-16-5p	CHRNA1
SH3BP5-AS1	hsa-miR-16-5p	B4GALNT3
SH3BP5-AS1	hsa-miR-15b-5p	B4GALNT3
SH3BP5-AS1	hsa-miR-195-5p	B4GALNT3
SH3BP5-AS1	hsa-miR-15a-5p	B4GALNT3
SH3BP5-AS1	hsa-let-7b-5p	TGFB1I1
SH3BP5-AS1	hsa-miR-195-5p	TGFB1I1
SH3BP5-AS1	hsa-miR-16-5p	TGFB1I1
SH3BP5-AS1	hsa-let-7b-5p	MYOCD
SH3BP5-AS1	hsa-miR-16-5p	MYOCD
SH3BP5-AS1	hsa-let-7b-5p	EPHA2
SH3BP5-AS1	hsa-let-7a-5p	EPHA2
SH3BP5-AS1	hsa-miR-195-5p	EPHA2
SH3BP5-AS1	hsa-miR-22-3p	EPHA2
SH3BP5-AS1	hsa-miR-16-5p	EPHA2
SH3BP5-AS1	hsa-let-7g-5p	XPR1
SH3BP5-AS1	hsa-let-7a-5p	XPR1
SH3BP5-AS1	hsa-let-7i-5p	XPR1
SH3BP5-AS1	hsa-let-7f-5p	XPR1
SH3BP5-AS1	hsa-let-7b-5p	XPR1
SH3BP5-AS1	hsa-miR-16-5p	SORBS2
SH3BP5-AS1	hsa-let-7b-5p	SORBS2
SH3BP5-AS1	hsa-miR-15a-5p	NMNAT2
SH3BP5-AS1	hsa-miR-195-5p	NMNAT2
SH3BP5-AS1	hsa-miR-15a-5p	ZNF618
SH3BP5-AS1	hsa-let-7b-5p	ZNF618
SH3BP5-AS1	hsa-miR-16-5p	ZNF618
SH3BP5-AS1	hsa-miR-195-5p	HK2
SH3BP5-AS1	hsa-let-7b-5p	HK2
SH3BP5-AS1	hsa-miR-16-5p	HK2
SH3BP5-AS1	hsa-miR-16-5p	CALM3
SH3BP5-AS1	hsa-let-7f-5p	CALM3
SH3BP5-AS1	hsa-let-7g-5p	CALM3
SH3BP5-AS1	hsa-let-7b-5p	CALM3
SH3BP5-AS1	hsa-let-7i-5p	CALM3
SH3BP5-AS1	hsa-let-7a-5p	CALM3
SH3BP5-AS1	hsa-miR-22-3p	CALM3
SH3BP5-AS1	hsa-let-7b-5p	DIRAS3
SH3BP5-AS1	hsa-miR-16-5p	DIRAS3
SH3BP5-AS1	hsa-miR-22-3p	MYOZ3
SH3BP5-AS1	hsa-miR-195-5p	PDP1
SH3BP5-AS1	hsa-let-7b-5p	PDP1
SH3BP5-AS1	hsa-miR-16-5p	PDP1
SH3BP5-AS1	hsa-miR-15b-5p	PDP1
SH3BP5-AS1	hsa-miR-15a-5p	PDP1
SH3BP5-AS1	hsa-miR-16-5p	PACSIN3
SH3BP5-AS1	hsa-miR-22-3p	PACSIN3
SH3BP5-AS1	hsa-let-7a-5p	NAV2
SH3BP5-AS1	hsa-miR-16-5p	NAV2
SH3BP5-AS1	hsa-miR-22-3p	NAV2
SH3BP5-AS1	hsa-let-7b-5p	FRMD5
SH3BP5-AS1	hsa-miR-195-5p	FRMD5
SH3BP5-AS1	hsa-miR-16-5p	FRMD5
SH3BP5-AS1	hsa-miR-16-5p	RASGRP1
SH3BP5-AS1	hsa-let-7b-5p	RASGRP1
SH3BP5-AS1	hsa-let-7f-5p	LCLAT1
SH3BP5-AS1	hsa-let-7b-5p	LCLAT1
SH3BP5-AS1	hsa-let-7e-5p	LCLAT1
SH3BP5-AS1	hsa-let-7a-5p	LCLAT1
SH3BP5-AS1	hsa-let-7g-5p	LCLAT1
SH3BP5-AS1	hsa-let-7i-5p	LCLAT1
SH3BP5-AS1	hsa-miR-22-3p	ADCY6
SH3BP5-AS1	hsa-miR-15b-5p	ADCY6
SH3BP5-AS1	hsa-miR-15a-5p	ADCY6
SH3BP5-AS1	hsa-miR-195-5p	ADCY6
SH3BP5-AS1	hsa-miR-16-5p	ADCY6
SH3BP5-AS1	hsa-miR-16-5p	ETV4
SH3BP5-AS1	hsa-let-7b-5p	ETV4
SH3BP5-AS1	hsa-miR-16-5p	MTURN
SH3BP5-AS1	hsa-miR-195-5p	MTURN
SH3BP5-AS1	hsa-miR-15a-5p	MTURN
SH3BP5-AS1	hsa-miR-15b-5p	MTURN
SH3BP5-AS1	hsa-miR-16-5p	KCNA4
SH3BP5-AS1	hsa-miR-195-5p	COLEC10
SH3BP5-AS1	hsa-let-7e-5p	ROR1
SH3BP5-AS1	hsa-let-7b-5p	ROR1
SH3BP5-AS1	hsa-miR-16-5p	ROR1
SH3BP5-AS1	hsa-miR-16-5p	OLFML2A
SH3BP5-AS1	hsa-let-7b-5p	OLFML2A
SH3BP5-AS1	hsa-miR-16-5p	SPRY4
SH3BP5-AS1	hsa-miR-15a-5p	SPRY4
SH3BP5-AS1	hsa-miR-15b-5p	SPRY4
SH3BP5-AS1	hsa-miR-195-5p	FAM180A
SH3BP5-AS1	hsa-miR-16-5p	FAM180A
SH3BP5-AS1	hsa-miR-195-5p	PDGFA
SH3BP5-AS1	hsa-miR-15a-5p	PDGFA
SH3BP5-AS1	hsa-miR-16-5p	PDGFA
SH3BP5-AS1	hsa-miR-15b-5p	PDGFA
SH3BP5-AS1	hsa-miR-195-5p	MAFK
SH3BP5-AS1	hsa-miR-16-5p	MAFK
SH3BP5-AS1	hsa-miR-15a-5p	MAFK
SH3BP5-AS1	hsa-miR-15b-5p	MAFK
SH3BP5-AS1	hsa-miR-16-5p	SCAMP5
SH3BP5-AS1	hsa-miR-15b-5p	SCAMP5
SH3BP5-AS1	hsa-miR-15a-5p	SCAMP5
SH3BP5-AS1	hsa-miR-195-5p	SCAMP5
SH3BP5-AS1	hsa-let-7b-5p	LBH
SH3BP5-AS1	hsa-miR-16-5p	LBH
SH3BP5-AS1	hsa-miR-195-5p	LBH
SH3BP5-AS1	hsa-miR-16-5p	B3GNT9
SFTA1P	hsa-miR-149-5p	CHGB
SFTA1P	hsa-miR-143-3p	CHGB
SFTA1P	hsa-miR-149-5p	ARVCF
SFTA1P	hsa-miR-149-5p	FGF14
SFTA1P	hsa-miR-143-3p	GNL3L
SFTA1P	hsa-miR-143-3p	PLCE1
SFTA1P	hsa-miR-143-3p	CALM3
SFTA1P	hsa-miR-149-5p	CALM3
SFTA1P	hsa-miR-143-3p	SLC6A20
SFTA1P	hsa-miR-143-3p	PDP1
SFTA1P	hsa-miR-149-5p	PDP1
SFTA1P	hsa-miR-149-5p	MAP1A
SFTA1P	hsa-miR-143-3p	MAP1A
SFTA1P	hsa-miR-143-3p	LINGO1
SFTA1P	hsa-miR-143-3p	DLGAP1
SFTA1P	hsa-miR-143-3p	RASGRP1
SFTA1P	hsa-miR-149-5p	LINC00672
LINC00884	hsa-miR-338-3p	PTPN3
LINC00884	hsa-miR-338-3p	ARVCF
LINC00884	hsa-miR-338-3p	NHSL1
LINC00884	hsa-miR-338-3p	NEU3
LINC00884	hsa-miR-338-3p	MTCL1
LINC00884	hsa-miR-338-3p	BEGAIN
LINC00884	hsa-miR-338-3p	LINC00672
KRTAP5-AS1	hsa-miR-766-3p	RNF216
KRTAP5-AS1	hsa-miR-130b-5p	RNF216
KRTAP5-AS1	hsa-miR-149-5p	RNF216
KRTAP5-AS1	hsa-miR-520a-5p	RNF216
KRTAP5-AS1	hsa-miR-181a-5p	VASH1
KRTAP5-AS1	hsa-miR-766-3p	VASH1
KRTAP5-AS1	hsa-miR-221-5p	VASH1
KRTAP5-AS1	hsa-miR-143-3p	VASH1
KRTAP5-AS1	hsa-miR-149-5p	CHGB
KRTAP5-AS1	hsa-miR-378a-5p	CHGB
KRTAP5-AS1	hsa-miR-143-3p	CHGB
KRTAP5-AS1	hsa-miR-146a-3p	CHGB
KRTAP5-AS1	hsa-miR-181a-5p	KCTD17
KRTAP5-AS1	hsa-miR-615-5p	KCTD17
KRTAP5-AS1	hsa-miR-149-5p	FGF14
KRTAP5-AS1	hsa-miR-125b-5p	FGF14
KRTAP5-AS1	hsa-miR-125a-5p	FGF14
KRTAP5-AS1	hsa-miR-500a-3p	EPHA4
KRTAP5-AS1	hsa-miR-24-3p	EPHA4
KRTAP5-AS1	hsa-miR-362-3p	EPHA4
KRTAP5-AS1	hsa-miR-125a-5p	EPHA4
KRTAP5-AS1	hsa-miR-125b-5p	EPHA4
KRTAP5-AS1	hsa-miR-766-3p	EPHA4
KRTAP5-AS1	hsa-miR-193b-3p	EPHA4
KRTAP5-AS1	hsa-miR-3176	EPHA4
KRTAP5-AS1	hsa-miR-378a-5p	PPP1R12C
KRTAP5-AS1	hsa-miR-125a-5p	PPP1R12C
KRTAP5-AS1	hsa-miR-3176	PPP1R12C
KRTAP5-AS1	hsa-miR-125b-5p	PPP1R12C
KRTAP5-AS1	hsa-miR-766-3p	PPP1R12C
KRTAP5-AS1	hsa-miR-518c-5p	ALPK3
KRTAP5-AS1	hsa-miR-520a-5p	ALPK3
KRTAP5-AS1	hsa-miR-125a-5p	ALPK3
KRTAP5-AS1	hsa-miR-125b-5p	ALPK3
KRTAP5-AS1	hsa-miR-125a-5p	PRICKLE1
KRTAP5-AS1	hsa-miR-125b-5p	PRICKLE1
KRTAP5-AS1	hsa-miR-766-3p	PRICKLE1
KRTAP5-AS1	hsa-miR-223-5p	SORBS2
KRTAP5-AS1	hsa-miR-125a-5p	SORBS2
KRTAP5-AS1	hsa-miR-125b-5p	SORBS2
KRTAP5-AS1	hsa-miR-221-5p	ZNF618
KRTAP5-AS1	hsa-miR-193b-3p	ZNF618
KRTAP5-AS1	hsa-miR-143-3p	ZNF618
KRTAP5-AS1	hsa-miR-181a-5p	ZNF618
KRTAP5-AS1	hsa-miR-125b-5p	HK2
KRTAP5-AS1	hsa-miR-143-3p	HK2
KRTAP5-AS1	hsa-miR-181a-5p	HK2
KRTAP5-AS1	hsa-miR-125a-5p	HK2
KRTAP5-AS1	hsa-miR-181c-5p	HK2
KRTAP5-AS1	hsa-miR-502-3p	CALM3
KRTAP5-AS1	hsa-miR-362-3p	CALM3
KRTAP5-AS1	hsa-miR-296-5p	CALM3
KRTAP5-AS1	hsa-miR-501-3p	CALM3
KRTAP5-AS1	hsa-miR-149-5p	CALM3
KRTAP5-AS1	hsa-miR-143-3p	CALM3
KRTAP5-AS1	hsa-miR-181a-5p	CALM3
KRTAP5-AS1	hsa-miR-24-3p	SLC6A20
KRTAP5-AS1	hsa-miR-143-3p	SLC6A20
KRTAP5-AS1	hsa-miR-766-3p	MKRN2OS
AL138828.1	hsa-miR-10a-5p	MCF2L2
AL049838.1	hsa-miR-23b-3p	MAP4
AL049838.1	hsa-miR-101-3p	MAP4
AL049838.1	hsa-miR-23a-3p	MAP4
AL049838.1	hsa-miR-126-5p	MAP4
AL049838.1	hsa-miR-126-5p	RPS6KA2
AL049838.1	hsa-miR-143-3p	RPS6KA2
AL049838.1	hsa-miR-101-3p	RPS6KA2
AL049838.1	hsa-miR-101-3p	OXCT1
AL049838.1	hsa-miR-23a-3p	OXCT1
AL049838.1	hsa-miR-23b-3p	OXCT1
AL049838.1	hsa-miR-101-3p	BAMBI
AL049838.1	hsa-miR-23b-3p	BAMBI
AL049838.1	hsa-miR-101-3p	DOK5
AL049838.1	hsa-miR-23b-3p	MYL12A
AL049838.1	hsa-miR-23a-3p	MYL12A
AL049838.1	hsa-miR-101-3p	CRYM
AL049838.1	hsa-miR-143-3p	ATRNL1
AL049838.1	hsa-miR-23b-3p	ATRNL1
AL049838.1	hsa-miR-23a-3p	ATRNL1
AL049838.1	hsa-miR-23a-3p	PRKAR1A
AL049838.1	hsa-miR-101-3p	PRKAR1A
AL049838.1	hsa-miR-23b-3p	PRKAR1A
AL049838.1	hsa-miR-101-3p	SLC1A2
AL049838.1	hsa-miR-126-5p	SLC1A2
AL049838.1	hsa-miR-143-3p	SLC1A2
AL049838.1	hsa-miR-101-3p	PDE8B
AL049838.1	hsa-miR-23b-3p	PDE8B
AL049838.1	hsa-miR-23a-3p	PDE8B
AL049838.1	hsa-miR-143-3p	FGF1
AL049838.1	hsa-miR-101-3p	FGF1
AL049838.1	hsa-miR-126-5p	FGF1
AL049838.1	hsa-miR-23b-3p	FHL2
AL049838.1	hsa-miR-23a-3p	FHL2
AL049838.1	hsa-miR-101-3p	CSRP3
AL049838.1	hsa-miR-126-5p	ATP13A3
AL049838.1	hsa-miR-23b-3p	ATP13A3
AL049838.1	hsa-miR-23a-3p	ATP13A3
AL049838.1	hsa-miR-23b-3p	TTC9
AL049838.1	hsa-miR-23a-3p	TTC9
AL049838.1	hsa-miR-23a-3p	EPHA2
AL049838.1	hsa-miR-101-3p	EPHA2
AL049838.1	hsa-miR-143-3p	ZNF618
AL049838.1	hsa-miR-101-3p	ZNF618
AL049838.1	hsa-miR-101-3p	LRRC38
AL049838.1	hsa-miR-143-3p	SLC6A20
AL049838.1	hsa-miR-126-5p	TMEM144
AL049838.1	hsa-miR-101-3p	TMEM144
AL049838.1	hsa-miR-143-3p	PDP1
AL049838.1	hsa-miR-101-3p	PDP1
AL049838.1	hsa-miR-101-3p	SPACA9
AL049838.1	hsa-miR-101-3p	SYNPO2L
AL049838.1	hsa-miR-143-3p	MAP1A
AL049838.1	hsa-miR-23b-3p	MAP1A
AL049838.1	hsa-miR-23a-3p	MAP1A
AL049838.1	hsa-miR-23b-3p	KCNJ4
AL049838.1	hsa-miR-23a-3p	MTCL1
AL049838.1	hsa-miR-23b-3p	MTCL1
AL049838.1	hsa-miR-23a-3p	PLEKHA2
AL049838.1	hsa-miR-23b-3p	PLEKHA2
AL049838.1	hsa-miR-143-3p	DLGAP1
AL049838.1	hsa-miR-101-3p	DLGAP1
AL049838.1	hsa-miR-23b-3p	KCNK3
AL049838.1	hsa-miR-23a-3p	KCNK3
AL049838.1	hsa-miR-23a-3p	ADCY6
AL049838.1	hsa-miR-23b-3p	ADCY6
AL049838.1	hsa-miR-101-3p	PYCR1
AL049838.1	hsa-miR-23a-3p	PYCR1
AL049838.1	hsa-miR-23b-3p	PYCR1
AL049838.1	hsa-miR-23b-3p	KCNQ3
AL049838.1	hsa-miR-23a-3p	KCNQ3
AL049838.1	hsa-miR-23b-3p	NAP1L3
AL049838.1	hsa-miR-23a-3p	NAP1L3
AL049838.1	hsa-miR-101-3p	TRIQK
AL049838.1	hsa-miR-126-5p	TRIQK
AL049838.1	hsa-miR-101-3p	CPT1B
AL049838.1	hsa-miR-23b-3p	ETV5
AL049838.1	hsa-miR-101-3p	ETV5
AL049838.1	hsa-miR-23a-3p	LINC00672
AL049838.1	hsa-miR-23b-3p	LINC00672
LINC01616	hsa-miR-1-3p	ITGA3
LINC01616	hsa-miR-101-3p	ITGA3
LINC01616	hsa-miR-1-3p	ST3GAL1
LINC01616	hsa-miR-101-3p	ST3GAL1
LINC01616	hsa-miR-101-3p	RNF216
LINC01616	hsa-miR-149-5p	RNF216
LINC01616	hsa-miR-1-3p	ARNTL2
LINC01616	hsa-miR-101-3p	ARNTL2
LINC01616	hsa-miR-101-3p	MAP4
LINC01616	hsa-miR-369-3p	MAP4
LINC01616	hsa-miR-1-3p	MAP4
LINC01616	hsa-miR-101-3p	OXCT1
LINC01616	hsa-miR-1-3p	OXCT1
LINC01616	hsa-miR-1-3p	BAMBI
LINC01616	hsa-miR-101-3p	BAMBI
LINC01616	hsa-miR-1-3p	STX1B
LINC01616	hsa-miR-149-5p	ARVCF
LINC01616	hsa-miR-101-3p	DOK5
LINC01616	hsa-miR-149-5p	FGF14
LINC01616	hsa-miR-369-3p	FGF14
LINC01616	hsa-miR-101-3p	CRYM
LINC01616	hsa-miR-369-3p	SLC1A2
LINC01616	hsa-miR-101-3p	SLC1A2
LINC01616	hsa-miR-1-3p	SLC1A2
LINC01616	hsa-miR-101-3p	SH2B3
LINC01616	hsa-miR-1-3p	SH2B3
LINC01616	hsa-miR-101-3p	DAP
LINC01616	hsa-miR-1-3p	DAP
LINC01616	hsa-miR-1-3p	FGF1
LINC01616	hsa-miR-101-3p	FGF1
LINC01616	hsa-miR-1-3p	SLC1A4
LINC01616	hsa-miR-101-3p	SLC1A4
LINC01616	hsa-miR-1-3p	SPR
LINC01616	hsa-miR-1-3p	RGS4
LINC01616	hsa-miR-369-3p	RGS4
LINC01616	hsa-miR-101-3p	NPPB
LINC01616	hsa-miR-101-3p	COL21A1
LINC01616	hsa-miR-101-3p	CSRP3
LINC01616	hsa-miR-101-3p	BEX1
LINC01616	hsa-miR-1-3p	BEX1
LINC01616	hsa-miR-1-3p	ARMH4
LINC01616	hsa-miR-1-3p	TGFB1I1
LINC01616	hsa-miR-149-5p	TGFB1I1
LINC01616	hsa-miR-1-3p	MYOCD
LINC01616	hsa-miR-1-3p	SLC47A1
LINC01616	hsa-miR-101-3p	EPHA2
LINC01616	hsa-miR-1-3p	EPHA2
LINC01616	hsa-miR-369-3p	MED12L
LINC01616	hsa-miR-101-3p	MED12L
LINC01616	hsa-miR-1-3p	DPYSL4
LINC01616	hsa-miR-101-3p	SPOCK1
LINC01616	hsa-miR-1-3p	SPOCK1
LINC01616	hsa-miR-1-3p	FGF18
LINC01616	hsa-miR-369-3p	RCAN1
LINC01616	hsa-miR-1-3p	RCAN1
LINC01616	hsa-miR-101-3p	LRRC38
LINC01616	hsa-miR-101-3p	HSPA4L
LINC01616	hsa-miR-1-3p	HSPA4L
LINC01616	hsa-miR-101-3p	SPACA9
LINC01616	hsa-miR-1-3p	SPACA9
LINC01616	hsa-miR-1-3p	NAB2
LINC01616	hsa-miR-1-3p	MAP1A
LINC01616	hsa-miR-149-5p	MAP1A
LINC01616	hsa-miR-1-3p	DNAAF3
LINC01616	hsa-miR-1-3p	SYT12
LINC01616	hsa-miR-1-3p	ARHGAP1
LINC01616	hsa-miR-101-3p	ARHGAP1
LINC01616	hsa-miR-1-3p	FAM133A
LINC01616	hsa-miR-1-3p	LSMEM2
LINC01616	hsa-miR-1-3p	PYCR1
LINC01616	hsa-miR-101-3p	PYCR1
LINC01616	hsa-miR-101-3p	BEGAIN
LINC01616	hsa-miR-1-3p	BEGAIN
LINC01616	hsa-miR-1-3p	ADAMTSL5
LINC01616	hsa-miR-1-3p	PCYT2
LINC01616	hsa-miR-369-3p	NAP1L3
LINC01616	hsa-miR-1-3p	NAP1L3
LINC01616	hsa-miR-101-3p	PDGFA
LINC01616	hsa-miR-1-3p	PDGFA
LINC01616	hsa-miR-1-3p	COL13A1
LINC01616	hsa-miR-1-3p	MAFK
LINC01616	hsa-miR-101-3p	MAFK
LINC01616	hsa-miR-101-3p	TRIQK
LINC01616	hsa-miR-1-3p	TRIQK
LINC01616	hsa-miR-101-3p	CPT1B
LINC01616	hsa-miR-1-3p	LNP1
LINC01616	hsa-miR-1-3p	ETV5
LINC01616	hsa-miR-101-3p	ETV5
LINC01616	hsa-miR-149-5p	LINC00672
KCNJ2-AS1	hsa-miR-369-3p	FGF14
KCNJ2-AS1	hsa-miR-369-3p	MED12L
KCNJ2-AS1	hsa-miR-369-3p	BICD1
KCNJ2-AS1	hsa-miR-369-3p	FRMPD4
KCNJ2-AS1	hsa-miR-369-3p	PLCB1
KCNJ2-AS1	hsa-miR-369-3p	NAP1L3
